# Supplementary material for: Use of intravenous magnesium sulfate among patients with acute myocardial infarction in China from 2001 to 2015: China PEACE—Retrospective AMI Study
Source: PubMed Central journal article supplement — BMJ Open. 2020 Mar 26;10(3):e033269. doi: 10.1136/bmjopen-2019-033269 (PMC7170603; doi:10.1136/bmjopen-2019-033269), 2020-03-26
Supplement: bmjopen-2019-033269.draft_revisions.pdf [file bmjopen-2019-033269.draft_revisions.pdf]

# BMJ Open

BMJ Open is committed to open peer review. As part of this commitment we make the peer review history of every article we publish publicly available.

When an article is published we post the peer reviewers' comments and the authors' responses online. We also post the versions of the paper that were used during peer review. These are the versions that the peer review comments apply to.

The versions of the paper that follow are the versions that were submitted during the peer review process. They are not the versions of record or the final published versions. They should not be cited or distributed as the published version of this manuscript.

BMJ Open is an open access journal and the full, final, typeset and author-corrected version of record of the manuscript is available on our site with no access controls, subscription charges or pay-per-view fees (<http://bmjopen.bmj.com>).

If you have any questions on BMJ Open's open peer review process please email [info.bmjopen@bmj.com](mailto:info.bmjopen@bmj.com)

# BMJ Open

## Use of Intravenous Magnesium Sulfate among Patients with Acute Myocardial Infarction in China from 2001 to 2015: China PEACE-Retrospective AMI Study

|                               |                                                                                                                                                                                                                                                                                                                                                                                                                                                                                                                                                                                                                                                                                                                                                                                                                                                                                                                                                                                                                                                                                                                                                                                                                                                                                                                                                                                                                                                                                                                                                                                                                                                                                                                                                                                                                                                                                                                                                                                                                                                                                                                                                                                                                                                                                                      |
|-------------------------------|------------------------------------------------------------------------------------------------------------------------------------------------------------------------------------------------------------------------------------------------------------------------------------------------------------------------------------------------------------------------------------------------------------------------------------------------------------------------------------------------------------------------------------------------------------------------------------------------------------------------------------------------------------------------------------------------------------------------------------------------------------------------------------------------------------------------------------------------------------------------------------------------------------------------------------------------------------------------------------------------------------------------------------------------------------------------------------------------------------------------------------------------------------------------------------------------------------------------------------------------------------------------------------------------------------------------------------------------------------------------------------------------------------------------------------------------------------------------------------------------------------------------------------------------------------------------------------------------------------------------------------------------------------------------------------------------------------------------------------------------------------------------------------------------------------------------------------------------------------------------------------------------------------------------------------------------------------------------------------------------------------------------------------------------------------------------------------------------------------------------------------------------------------------------------------------------------------------------------------------------------------------------------------------------------|
| Journal:                      | <i>BMJ Open</i>                                                                                                                                                                                                                                                                                                                                                                                                                                                                                                                                                                                                                                                                                                                                                                                                                                                                                                                                                                                                                                                                                                                                                                                                                                                                                                                                                                                                                                                                                                                                                                                                                                                                                                                                                                                                                                                                                                                                                                                                                                                                                                                                                                                                                                                                                      |
| Manuscript ID                 | bmjopen-2019-033269                                                                                                                                                                                                                                                                                                                                                                                                                                                                                                                                                                                                                                                                                                                                                                                                                                                                                                                                                                                                                                                                                                                                                                                                                                                                                                                                                                                                                                                                                                                                                                                                                                                                                                                                                                                                                                                                                                                                                                                                                                                                                                                                                                                                                                                                                  |
| Article Type:                 | Original research                                                                                                                                                                                                                                                                                                                                                                                                                                                                                                                                                                                                                                                                                                                                                                                                                                                                                                                                                                                                                                                                                                                                                                                                                                                                                                                                                                                                                                                                                                                                                                                                                                                                                                                                                                                                                                                                                                                                                                                                                                                                                                                                                                                                                                                                                    |
| Date Submitted by the Author: | 29-Jul-2019                                                                                                                                                                                                                                                                                                                                                                                                                                                                                                                                                                                                                                                                                                                                                                                                                                                                                                                                                                                                                                                                                                                                                                                                                                                                                                                                                                                                                                                                                                                                                                                                                                                                                                                                                                                                                                                                                                                                                                                                                                                                                                                                                                                                                                                                                          |
| Complete List of Authors:     | <p>Wang, Xianqiang; National Clinical Research Center of Cardiovascular Diseases, State Key Laboratory of Cardiovascular Disease, Fuwai Hospital, National Center for Cardiovascular Diseases, Chinese Academy of Medical Sciences and Peking Union Medical College, Beijing, People's Republic of China</p> <p>Du, Xue; National Clinical Research Center of Cardiovascular Diseases, State Key Laboratory of Cardiovascular Disease, Fuwai Hospital, National Center for Cardiovascular Diseases, Chinese Academy of Medical Sciences and Peking Union Medical College, Beijing, People's Republic of China</p> <p>Yang, Hao; National Clinical Research Center of Cardiovascular Diseases, State Key Laboratory of Cardiovascular Disease, Fuwai Hospital, National Center for Cardiovascular Diseases, Chinese Academy of Medical Sciences and Peking Union Medical College, Beijing, People's Republic of China</p> <p>Bucholz, Emily ; Center for Outcomes Research and Evaluation, Yale-New Haven Hospital</p> <p>Downing, Nicholas ; Center for Outcomes Research and Evaluation, Yale-New Haven Hospital</p> <p>Spertus, John; St. Luke's Mid America Heart Institute, Cardiovascular Outcomes Research</p> <p>Masoudi, Fredrick; University of Colorado Anschutz Medical Campus, Medicine</p> <p>Li, Jing; National Clinical Research Center of Cardiovascular Diseases, State Key Laboratory of Cardiovascular Disease, Fuwai Hospital, National Center for Cardiovascular Diseases, Chinese Academy of Medical Sciences and Peking Union Medical College, Beijing, People's Republic of China</p> <p>Guan, Wenchi; National Clinical Research Center of Cardiovascular Diseases, State Key Laboratory of Cardiovascular Disease, Fuwai Hospital, National Center for Cardiovascular Diseases, Chinese Academy of Medical Sciences and Peking Union Medical College, Beijing, People's Republic of China</p> <p>Gao, Yan; National Clinical Research Center of Cardiovascular Diseases, State Key Laboratory of Cardiovascular Disease, Fuwai Hospital, National Center for Cardiovascular Diseases, Chinese Academy of Medical Sciences and Peking Union Medical College, Beijing, People's Republic of China</p> <p>Hu, Shuang; National Clinical Research Center of Cardiovascular</p> |

1  
2  
3  
4  
5  
6  
7  
8  
9  
10  
11  
12  
13  
14  
15  
16  
17  
18  
19  
20  
21  
22  
23  
24  
25  
26  
27  
28  
29  
30  
31  
32  
33  
34  
35  
36  
37  
38  
39  
40  
41  
42  
43  
44  
45  
46  
47  
48  
49  
50  
51  
52  
53  
54  
55  
56  
57  
58  
59  
60

|           |                                                                                                                                                                                                                                                                                                                                                                                                                                                                                                                                                                                                                                                                                                                                                                                                                                                                                                                                                   |
|-----------|---------------------------------------------------------------------------------------------------------------------------------------------------------------------------------------------------------------------------------------------------------------------------------------------------------------------------------------------------------------------------------------------------------------------------------------------------------------------------------------------------------------------------------------------------------------------------------------------------------------------------------------------------------------------------------------------------------------------------------------------------------------------------------------------------------------------------------------------------------------------------------------------------------------------------------------------------|
|           | <p>Diseases, State Key Laboratory of Cardiovascular Disease, Fuwai Hospital, National Center for Cardiovascular Diseases, Chinese Academy of Medical Sciences and Peking Union Medical College, Beijing, People's Republic of China</p> <p>Bai, Xueke; National Clinical Research Center of Cardiovascular Diseases, State Key Laboratory of Cardiovascular Disease, Fuwai Hospital, National Center for Cardiovascular Diseases, Chinese Academy of Medical Sciences and Peking Union Medical College, Beijing, People's Republic of China</p> <p>Krumholz, Harlan; Yale-New Haven Hospital Center for Outcomes Research and Evaluation,</p> <p>Li, Xi; National Clinical Research Center of Cardiovascular Diseases, State Key Laboratory of Cardiovascular Disease, Fuwai Hospital, National Center for Cardiovascular Diseases, Chinese Academy of Medical Sciences and Peking Union Medical College, Beijing, People's Republic of China</p> |
| Keywords: | acute myocardial infarction, Magnesium Sulfate, quality of health care                                                                                                                                                                                                                                                                                                                                                                                                                                                                                                                                                                                                                                                                                                                                                                                                                                                                            |
|           |                                                                                                                                                                                                                                                                                                                                                                                                                                                                                                                                                                                                                                                                                                                                                                                                                                                                                                                                                   |

SCHOLARONE™  
Manuscripts

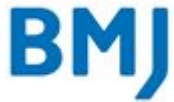

I, the Submitting Author has the right to grant and does grant on behalf of all authors of the Work (as defined in the below author licence), an exclusive licence and/or a non-exclusive licence for contributions from authors who are: i) UK Crown employees; ii) where BMJ has agreed a CC-BY licence shall apply, and/or iii) in accordance with the terms applicable for US Federal Government officers or employees acting as part of their official duties; on a worldwide, perpetual, irrevocable, royalty-free basis to BMJ Publishing Group Ltd ("BMJ") its licensees and where the relevant Journal is co-owned by BMJ to the co-owners of the Journal, to publish the Work in this journal and any other BMJ products and to exploit all rights, as set out in our [licence](#).

The Submitting Author accepts and understands that any supply made under these terms is made by BMJ to the Submitting Author unless you are acting as an employee on behalf of your employer or a postgraduate student of an affiliated institution which is paying any applicable article publishing charge ("APC") for Open Access articles. Where the Submitting Author wishes to make the Work available on an Open Access basis (and intends to pay the relevant APC), the terms of reuse of such Open Access shall be governed by a Creative Commons licence – details of these licences and which [Creative Commons](#) licence will apply to this Work are set out in our licence referred to above.

Other than as permitted in any relevant BMJ Author's Self Archiving Policies, I confirm this Work has not been accepted for publication elsewhere, is not being considered for publication elsewhere and does not duplicate material already published. I confirm all authors consent to publication of this Work and authorise the granting of this licence.

1  
2  
3 1 **Use of Intravenous Magnesium Sulfate among Patients with Acute Myocardial**  
4  
5 2 **Infarction in China from 2001 to 2015: China PEACE-Retrospective AMI Study**  
6

7 3  
8  
9 4 **Running head: Magnesium Sulfate for AMI in China**  
10

11 5  
12  
13 6 Xianqiang Wang\*, MD; Xue Du\*, MD; Hao Yang; Emily Bucholz, MD PhD; Nicholas  
14  
15 7 Downing, MD; John A. Spertus, MD, MPH; Frederick A Masoudi, MD, MSPH; Jing Li,  
16  
17 8 MD, PhD; Wenchi Guan, MD; Yan Gao; Shuang Hu, PhD; Xueke Bai, MS; Harlan M.  
18  
19 9 Krumholz#, MD SM; Xi Li#, PhD; for the China PEACE Collaborative Group (see  
20  
21 10 Appendix A)  
22  
23

24 11  
25  
26 12 \* Contribute equally  
27

28 13 # Co-senior authors  
29

30 14  
31  
32 15 National Clinical Research Center of Cardiovascular Diseases, State Key Laboratory  
33  
34 16 of Cardiovascular Disease (XW, XD, HY, JL, WG, YG, SH, XB, XL), Fuwai Hospital,  
35  
36 17 National Center for Cardiovascular Diseases, Chinese Academy of Medical Sciences  
37  
38 18 and Peking Union Medical College, Beijing, People's Republic of China;  
39  
40 19 Saint Luke's Mid America Heart Institute and the University of Missouri-Kansas City  
41  
42 20 (JAS), Kansas City, Missouri, United States;  
43  
44 21 Division of Cardiology (FAM), University of Colorado Anschutz Medical Campus,  
45  
46 22 Aurora, Colorado, United States;  
47  
48 23 Center for Outcomes Research and Evaluation (HMK, EB, ND), Yale-New Haven  
49  
50 24 Hospital, New Haven, Connecticut, United States; Section of Cardiovascular  
51  
52 25 Medicine (HMK), Robert Wood Johnson Clinical Scholars Program (HMK),  
53  
54 26 Department of Internal Medicine, Yale University School of Medicine, New Haven,  
55  
56 27 Connecticut, United States; Department of Health Policy and Management (HMK),  
57  
58 28 Yale School of Public Health, New Haven, Connecticut, United States.  
59  
60

1  
2  
3 1 **Correspondence:** Dr Xi Li, National Clinical Research Center of Cardiovascular  
4  
5 2 Diseases, Fuwai Hospital, 167 Beilishi Road, Beijing 100037, People's Republic of  
6  
7 3 China; Tel: +86 10 8839 6203; Fax: +86 10 8836 5201;  
8  
9 4 Email: academic\_event@163.com  
10  
11  
12 5  
13  
14  
15  
16  
17  
18  
19  
20  
21  
22  
23  
24  
25  
26  
27  
28  
29  
30  
31  
32  
33  
34  
35  
36  
37  
38  
39  
40  
41  
42  
43  
44  
45  
46  
47  
48  
49  
50  
51  
52  
53  
54  
55  
56  
57  
58  
59  
60

For peer review only

1  
2  
3 1 **ABSTRACT**

4  
5 2 **Objective**

6  
7 3 To assess the trends and variation in use of IV magnesium sulfate among patient  
8  
9 4 with acute myocardial infarction (AMI) in China.

10  
11 5 **Methods**

12  
13 6 In an observational study (China PEACE–Retrospective Study) of AMI care, we used  
14  
15 7 a 2-stage, random sampling strategy to create a nationally representative sample of  
16  
17 8 28,208 patients with AMI at 162 Chinese hospitals in 2001, 2006, 2011, and 2015.  
18  
19 9 The main outcome is use of IV magnesium sulfate over time.

20  
21  
22 10 **Results**

23  
24 11 We identified 24,418 patients admitted for AMI, without hypokalemia, in the four  
25  
26 12 study years. Over time, there was a significant initial decrease in IV magnesium  
27  
28 13 sulfate use, from 32.1% in 2001 to 17.1% in 2015 ( $p < .001$  for trend). The decline  
29  
30 14 was greater in the Eastern (from 33.3% to 16.5%) and Western (from 34.8% to  
31  
32 15 17.2%) regions, as compared with the Central region (from 25.9% to 18.1%), with  
33  
34 16 little difference between rural and urban areas. The proportion of hospitals using IV  
35  
36 17 magnesium sulfate did not change over time (from 81.3% to 77.9%). The median  
37  
38 18 odds ratios, representing hospital-level variation, were 6.03 in 2001, 3.86 in 2006,  
39  
40 19 4.26 in 2011, and 4.72 in 2015. IV magnesium sulfate use was associated with  
41  
42 20 cardiac arrest at admission and receipt of reperfusion therapy, but no hospital-  
43  
44 21 specific characteristics.

45  
46  
47 22 **Conclusions**

48  
49 23 Despite recommendations against its use, IV magnesium sulfate is used in about 1 in  
50  
51 24 6 patients with AMI in China. Our findings highlight the need for more efficient  
52  
53 25 mechanisms to stop using ineffective therapies to improve patients' outcomes and  
54  
55 26 reduce medical waste.

56  
57  
58 27

59  
60 28

## 1 **Clinical Trial Registration**

2 URL: <https://www.clinicaltrials.gov>. Unique identifier: NCT01624883

## 3 **Keywords**

4 acute myocardial infarction, Magnesium Sulfate, quality of health care

5

6

## 7 **Strengths and limitations of this study**

- 8 • This is the first large nationally representative registry demonstrating IV  
9 magnesium sulfate is still used in about 1 in 6 patients with AMI in China,  
10 despite recommendations against its use since 2000s.
- 11 • The study assessed the 15-year trend in the use of IV magnesium sulfate  
12 among patient with AMI in China.
- 13 • The study firstly reported both patients- and hospital-level resulted in the use  
14 of IV magnesium sulfate use, which could provide more targeted information  
15 for efficient mechanisms to stop using this ineffective therapy.
- 16 • The study adopted standardized procedures for abstraction of medical  
17 records that ensure the reliability of our results in describing the use pattern  
18 of magnesium sulfate in the real world.
- 19 • The very low prevalence of patients with some indications, such as  
20 magnesium sulfate deficiency would have little influence on the reliability of  
21 the results.

22



## 1 INTRODUCTION

2 The history of intravenous (IV) magnesium sulfate use for acute myocardial infarction  
3 (AMI) is convoluted. Once lauded in small, early trials as safe and highly effective,<sup>1-3</sup>  
4 it was later demonstrated to be ineffective, and even harmful, in two large clinical  
5 trials (MAGIC and ISIS-4) and in a subsequent meta-analysis.<sup>4 5</sup> Beginning in the  
6 early 2000s, AMI practice guidelines in the United States have specifically  
7 recommended against its routine use (Class III, level of evidence: C).<sup>6 7</sup> Similarly,  
8 China published guidelines in 2001 recommending against the use of IV magnesium  
9 sulfate in patients with AMI, except in the setting of hypomagnesemia or polymorphic  
10 ventricular tachycardia.<sup>8</sup>

11  
12 Although several studies have evaluated the introduction and uptake of new  
13 therapies,<sup>9-11</sup> few have examine de-adoption of ineffective therapy in clinical  
14 practice.<sup>12</sup> The de-adoption of therapy is particularly important because the situation  
15 may involve greater resistance and barriers to discontinuing long-standing practices  
16 than simply introducing new and promising therapies into practice.<sup>13</sup> Characterizing  
17 the use of magnesium sulfate for AMI in clinical practice offers an opportunity to  
18 assess the speed with which providers stop using a therapy when new evidence has  
19 overturned prior dogma.

20  
21 Accordingly, our objectives were to assess the trends and variation of regional and  
22 hospital-level use of IV magnesium sulfate among patient with AMI using data from  
23 the China PEACE Retrospective AMI Study between 2001 and 2015. These data,  
24 from a nationally representative network of hospitals throughout China, provided a  
25 unique opportunity to examine the trend for discontinuing routine IV magnesium  
26 sulfate over time and to describe the variations across hospitals in its discontinuation.

27  
28

## 1       2       3       4       5       6       7       8       9       10       11       12       13       14       15       16       17       18       19       20       21       22       23       24       25       26       27       28       29       30       31       32       33       34       35       36       37       38       39       40       41       42       43       44       45       46       47       48       49       50       51       52       53       54       55       56       57       58       59       60

## 1       2       3       4       5       6       7       8       9       10       11       12       13       14       15       16       17       18       19       20       21       22       23       24       25       26       27       28

### 2       3       4       5       6       7       8       9       10       11       12       13       14       15       16       17       18       19       20       21       22       23       24       25       26       27       28       29       30       31       32       33       34       35       36       37       38       39       40       41       42       43       44       45       46       47       48       49       50       51       52       53       54       55       56       57       58       59       60

### 1       2       3       4       5       6       7       8       9       10       11       12       13       14       15       16       17       18       19       20       21       22       23       24       25       26       27       28

3       4       5       6       7       8       9       10       11       12       13       14       15       16       17       18       19       20       21       22       23       24       25       26       27       28       29       30       31       32       33       34       35       36       37       38       39       40       41       42       43       44       45       46       47       48       49       50       51       52       53       54       55       56       57       58       59       60

The design and methods of the China PEACE-Retrospective AMI Study have been previously published.<sup>14</sup> In addition to a nationally representative sample of patients admitted for AMI in China during 2001, 2006, and 2011 created in the China PEACE-Retrospective AMI Study, we also included a more recent sample of patients admitted in 2015 using the same two-stage random sampling process. Briefly, in the first stage, we identified hospitals using a simple random sampling procedure within 5 economic-geographic regions: Eastern rural, Central rural, Western rural, Eastern urban, and Central/Western urban. We stratified on both location and urban-rural classifications because economic development and clinical capacities differed across these categories. We sampled representative hospitals from 2011 to reflect current practices and used the same hospitals for the 2006, 2001, and 2015 so as to describe temporal trends. In the second stage, we sampled AMI cases from hospital databases in 2001, 2006, 2011, and 2015 using random sampling procedures.

17       18       19       20       21       22       23       24       25       26       27       28       29       30       31       32       33       34       35       36       37       38       39       40       41       42       43       44       45       46       47       48       49       50       51       52       53       54       55       56       57       58       59       60

Trained personnel at the national coordinating centers abstracted data from the medical records using standardized data definitions. Data abstraction quality was rigorously monitored by randomly auditing 5% of the medical records, in a process that ensured that the overall variable accuracy exceeded 98%.<sup>14</sup> We also obtained information on the organizational learning culture of hospital in 2013 through questionnaires completed by the director and a physician of the Cardiology Department in each participating hospital (see Appendix B).<sup>15</sup>

25       26       27       28       29       30       31       32       33       34       35       36       37       38       39       40       41       42       43       44       45       46       47       48       49       50       51       52       53       54       55       56       57       58       59       60

The Ethics Committee at the National Center for Cardiovascular Diseases approved the study. All collaborating hospitals either accepted central ethics approval or obtained local ethics approval by their ethics committees. Given the retrospective nature of the data and the lack of personal identifiers, patient-level consent was not

1 required. The study was registered with ClinicalTrials.gov (NCT01624883).

2

### 3 **Study Sample**

4 Among the randomly sampled patients hospitalized for AMI in 2001, 2006, 2011, and  
5 2015, only patients with a definite discharge diagnosis of AMI were included. We  
6 were unable to exclude patients with hypomagnesemia, because magnesium levels  
7 were not collected. However, we excluded patients with chart-documented  
8 hypokalemia during their hospitalization, which could also represent an indication for  
9 magnesium repletion. In hospital-level analysis, only hospitals with 10 or more cases  
10 in a study year were included.

11

### 12 **Variables**

13 Receipt of IV magnesium sulfate was ascertained from the medical record. Patient-  
14 level characteristics abstracted from the medical records included demographics  
15 (age, gender), medical history (hypertension, diabetes, dyslipidemia, current  
16 smoking, and history of myocardial infarction, coronary heart disease, ischemic  
17 stroke, coronary artery bypass grafting (CABG), or primary coronary intervention  
18 (PCI)), clinical presentation (chest discomfort, heart rate, systolic blood pressure on  
19 admission, and left bundle branch block on electrocardiogram), as well as in-hospital  
20 complications (cardiac arrest, cardiogenic shock, and acute stroke) and year of  
21 hospitalization (2001, 2006, 2011, 2015). The outcomes included: 1) in-hospital  
22 mortality or withdrawal from treatment due to a terminal status at discharge; and 2)  
23 in-hospital composite of major complications (including death, withdrawal from  
24 treatment, re-infarction, shock, ischemic stroke, or congestive heart failure  
25 (Appendix). Hospital characteristics included teaching status, PCI capability,  
26 economic geographic regions, and urban or rural location.

27

28 Organizational learning culture was measured with Learning Organization Survey

1 (LOS-27, an abbreviated version of the original Garvin et al. Learning Organization  
2 Survey).<sup>16</sup> The LOS-27 consists of 27 questions, grouped into 7 domains of  
3 organizational learning characteristics, including supportive learning environment,  
4 time for reflection, leadership that reinforces learning, experimentation, training,  
5 knowledge acquisition, and performance monitoring.

### 6 **Statistical analysis**

7 To examine the trends at both the population and hospital levels across different  
8 study periods, p-values for trends were reported using the Cochran–Armitage test.

9 We described the hospital-level distribution of the IV magnesium sulfate use among  
10 the hospitals with at least 10 patients with AMI in the study years. To further  
11 understand the hospital-level variation in IV magnesium sulfate use, we quantified  
12 inter-hospital variation using the median odds ratio (MOR), by constructing  
13 generalized estimating equations in 2001, 2006, 2011, and 2015, respectively. MOR  
14 represents the average (median) OR for receiving IV magnesium sulfate for 2 AMI  
15 patients with similar clinical characteristics admitted to 2 randomly selected hospitals.

16 To understand the most current pattern in IV magnesium sulfate use, we constructed  
17 multivariable models using the data from 2015, which also adopted generalized  
18 estimating equations to account for the clustering of patients within hospitals. Factors  
19 were selected based on clinical judgment and literature review,<sup>10,11</sup> including patient  
20 and hospital characteristics. All covariates, except those with frequencies below 1%,  
21 were included in the multivariable model. We transformed continuous variables (e.g.  
22 age and heart rate) into categorical variables using clinically meaningful cut-off  
23 values, and then created dummy variables. From the multivariable model in 2015, we  
24 then computed risk-standardized rates for each hospital separately. The risk-  
25 standardized rate was calculated as the ratio of observed to predicted outcomes,  
26 multiplied by the overall unadjusted rate, a form of indirect standardization.

1  
2  
3 1  
4  
5 2 To compare the outcomes between patients with and without IV magnesium sulfate,  
6  
7 3 we applied propensity score matching to adjust differences in observed  
8  
9 4 characteristics between them. We obtained the log odds of the probability that  
10  
11 5 patients received IV magnesium sulfate with modeling a function of all the variables  
12  
13 6 in Table 1. Then we performed a one-to-one no replacement match between the two  
14  
15 7 groups based on the estimated propensity score. The no IV magnesium sulfate  
16  
17 8 patients was matched if patient had the closest score with a randomly selected IV  
18  
19 9 magnesium sulfate patient, and were considered eligible to match if the estimated  
20  
21 10 logit within 0.6 standard deviation of the selected IV magnesium sulfate patient. This  
22  
23 11 matching interval has been shown to eliminate approximately 90% of the bias in  
24  
25 12 observed confounders (Appendix).<sup>17</sup>

26  
27  
28  
29  
30  
31 14 For the questionnaire with LOS-27 (Appendix), we analyzed the responses at the  
32  
33 15 hospital level by calculating the average of the 2 responses to each question.  
34  
35 16 Responses were categorized as positive if they were  $\geq 5$  on a 7-point scale or  $\geq 4$  on a  
36  
37 17 5-point scale. We then calculated the positive response rate at each hospital as the  
38  
39 18 proportion of questions that had a positive response by the hospital, and  
40  
41 19 demonstrated the correlations between positive response rate and risk-standardize  
42  
43 20 rate of IV magnesium sulfate use in 2015, as well as the reduction in IV magnesium  
44  
45 21 sulfate use from 2011 to 2015.

46  
47  
48  
49  
50 23 All comparisons were two-sided, with statistical significance defined as p less  
51  
52 24 than .05. Statistical analysis was done with SAS software, version 9.4, and R  
53  
54 25 software, version 3.3.1.

### 55 56 57 58 27 ***Patient and Public Involvement statement***

59  
60 28 Patients or public were not involved in the development of the study protocol.

## 1 RESULTS

### 2 *Study population*

3 We identified 28,208 patients with AMI in 2001, 2006, 2011 and 2015 admitted to  
4 162 hospitals. After excluding patients with hypokalemia (<3.5 mmol/L, n= 3,004),  
5 24,418 patients remained, including 2,073 in 2001, 3,888 in 2006, 8,117 in 2011 and  
6 10,340 in 2015 (**Figure 1**). In the study population, the average age was  $65.1 \pm 12.7$   
7 years, 29.7% were female, almost three quarters had at least one cardiac risk factors  
8 (hypertension, diabetes, dyslipidemia or smoking), and about 10% had has a prior  
9 myocardial infarction or ischemic stroke (**Table 1**).

10

### 11 *Temporal trends and regional variations in IV magnesium sulfate use*

12 Over time, there was a significant initial decrease in the use of IV magnesium sulfate,  
13 from 32.1% (665) in 2001 to 18.4% (715) in 2006, 15.4% (1,251) in 2011 and 17.1%  
14 (1,763) in 2015 ( $p < .001$  for trend) (**Figure 2**). There was significant variation in the  
15 temporal trends of use of IV magnesium sulfate across the five strata ( $p < .001$  for  
16 interaction). In general, the decline was greater in the Eastern region [16.8% (from  
17 33.3% in 2001 to 16.5% in 2015),  $p < .001$ ] and Western region [16.6% (from 34.8%  
18 in 2001 to 17.2% in 2015),  $p < .001$ ], compared with the Central regions [7.8% (from  
19 25.9% in 2001 to 18.1% in 2015),  $p < .001$ ]. There was a more modest difference  
20 between rural areas [16.3% (from 31.6% to 15.3%),  $p < .001$ ] than in urban areas  
21 [13.9% (from 32.4% to 18.5%),  $p < .001$ ]. No significant association was found  
22 between the positive response rate of LOS-27 in 2013 and the hospital-level  
23 reduction in IV magnesium sulfate use from 2011 to 2015 ( $R^2=0.011$ ,  $p = .237$ )  
24 (Appendix C).

25

### 26 *Hospital-level distributions in IV magnesium sulfate use*

27 We examined hospital-level rates of IV magnesium sulfate use among hospitals with

28

1  
2  
3 1 10 or more cases per year, and observed a downward trend in the median, from  
4  
5 2 17.4% in 2001, 9.1% in 2006, 8.0% in 2011 to 10.7% in 2015 (**Figure 3**). However,  
6  
7 3 the proportion of hospitals still using magnesium sulfate were 81.3% in 2001, 84.8%  
8  
9 4 in 2006, 76.6% in 2011, and 77.9% in 2015, with no significant decline (p for trend  
10  
11 5 = .26). Even in 2015, a quarter of hospitals had rates of IV magnesium sulfate use  
12  
13 6 exceeding 25%. The MORs (95% CI) of each year characterized similar degrees of  
14  
15 7 hospital-level variation (6.03 (3.93-8.52) in 2001, 3.86 (3.00-.4.77) in 2006, 4.26  
16  
17 8 (3.38-5.20) in 2011, and 4.72 (3.70-5.83) in 2015).  
18  
19  
20 9

### 21 22 10 ***Patient and hospital characteristics associated with IV magnesium sulfate use***

23  
24 11 In univariate analysis, patients receiving IV magnesium sulfate were more likely to  
25  
26 12 not have diabetes, dyslipidemia or a prior revascularization, were more likely to have  
27  
28 13 had a prior ischemic stroke or cardiac arrest at presentation. They were more likely  
29  
30 14 to receive reperfusion therapy, be at urban hospital, or be in Central or Western  
31  
32 15 regions (**Table 1**). In the multivariable model, presence of cardiac arrest at admission  
33  
34 16 (OR 3.41, 95% CI 2.2-5.26, P< .001) and receipt of reperfusion therapy (1.64 (1.38-  
35  
36 17 1.94) for fibrinolytic therapy, 1.68 (1.44-1.97) for primary PCI, both P< .0001) were  
37  
38 18 positively associated with IV magnesium sulfate use. No significant difference was  
39  
40 19 identified across the teaching status, economic geographic region and rural/urban of  
41  
42 20 hospitals (**Table 1**). The risk-standardized rate of IV magnesium sulfate use in 2015  
43  
44 21 was not associated with the positive response rate of LOS-27 ( $R^2=0.027$ ,  $p= .04$ )  
45  
46 22 (Appendix C).  
47  
48  
49 23

### 50 51 24 ***In-hospital outcomes of patients with and without IV magnesium sulfate use***

52  
53 25 In the patients treated with IV magnesium sulfate, the crude rates of in-hospital death  
54  
55 26 (7.5% vs. 6.4%) (**Figure 4**), in-hospital death or treatment withdraw (10.8% vs.  
56  
57 27 9.5%), and in-hospital composite of major complications (22.0% vs. 17.6%) were  
58  
59 28 higher than patients without IV magnesium sulfate therapy (P< .01 for all). After  
60



1  
2  
3 1 adjusted for hospital characteristics, patient risk profiles and reperfusion therapies,  
4  
5 2 using propensity score matching, the in-hospital death rates were not significantly  
6  
7 3 different between the treated and non-treated patients (OR 1.13, 95% CI 0.96-1.33,  
8  
9 4 P= .15). However, the patients treated with IV magnesium sulfate had still higher risk  
10  
11 5 for in-hospital death or treatment withdraw (OR 1.19, 95% CI 1.04-1.37, P= .01), and  
12  
13 6 in-hospital composite of major complications (OR 1.35, 95% CI 1.21-1.50, P< .001).  
14  
15  
16 7

## 17 8 **DISCUSSION**

19 9 In this large nationally representative study, we found that despite an initial decline in  
20  
21 10 the use of IV magnesium sulfate for patients with AMI in China after 2001, about 1 in  
22  
23 11 6 patients continued to be treated with it through 2015. Furthermore, there was  
24  
25 12 substantial variation in the use of IV magnesium sulfate use across hospitals. No  
26  
27 13 hospital characteristics were associated with IV magnesium sulfate use after  
28  
29 14 adjusting for patient factors. including cardiac arrest and use of reperfusion therapy  
30  
31 15 during hospitalization.  
32  
33 16

34  
35 17 Our study is the first, to our knowledge, to characterize the rate of de-adoption of  
36  
37 18 magnesium sulfate in patients with AMI in China. The only study on the use of  
38  
39 19 magnesium sulfate to treat AMI, which was based on data from the National Registry  
40  
41 20 of Myocardial Infarction (NRMI-2) in the United States, found that the use rate of  
42  
43 21 magnesium sulfate in patients within first 24 hours after AMI was 5.1% in 2001 – 5  
44  
45 22 years after the US guideline recommended against the use of magnesium sulfate.<sup>18</sup>  
46  
47 23 In contrast in 2015, three-fold more Chinese patients with AMI were receiving  
48  
49 24 magnesium sulfate. This is congruent with a survey among cardiologists in 2012,  
50  
51 25 where over one fifth reported that they were routinely using magnesium sulfate in  
52  
53 26 patients with ACS.<sup>19</sup>  
54  
55  
56  
57  
58  
59  
60

28 Several patient characteristics were identified to be associated with the use of IV



1  
2  
3 1 magnesium sulfate for AMI. It was plausible that the presence of cardiac arrest or  
4  
5 2 reperfusion therapy may spur some physicians to use magnesium sulfate to prevent  
6  
7 3 arrhythmias, according to prior studies in both China and other countries.<sup>1 6 20-23</sup>  
8  
9 4 These explanations, even though not recommended by the guidelines, highlighted  
10  
11 5 the gaps in physicians' practice and highlights the needs for targeted education in the  
12  
13 6 future.  
14  
15  
16 7

17  
18 8 The hospital-level and regional variations in IV magnesium sulfate highlights the  
19  
20 9 marked variability with which different hospitals adopted new evidence about the lack  
21  
22 10 of benefit from IV magnesium sulfate use. On the one hand, magnesium sulfate use  
23  
24 11 in 2015 was neither associated with hospital-specific characteristics, nor different  
25  
26 12 across geographic or socio-economic regions. On the other hand, the regional  
27  
28 13 variation in de-adoption of magnesium sulfate during the 15-year period seemed not  
29  
30 14 directly related to the regional socio-economic development status that might be  
31  
32 15 assumed to affect the resources available for acquiring and implementing guideline  
33  
34 16 recommendation. Moreover, no evidence connects organizational learning culture  
35  
36 17 with high performance, even much has been observed in studies of US hospitals.<sup>24</sup>  
37  
38 18 Given our findings, more research is needed to better understand current practice  
39  
40 19 patterns that cause some hospitals to still use ineffective therapies.  
41  
42  
43 20

44  
45 21 Our findings raise several questions about the dissemination and implementation of  
46  
47 22 evidence and guidelines in China, particularly regarding education for physicians  
48  
49 23 when long-standing therapies are demonstrated to be non-beneficial, and need to be  
50  
51 24 de-adopted. We hypothesized that several factors may explain why the rate of  
52  
53 25 magnesium sulfate use has remained relatively high in China. First, few actions have  
54  
55 26 been taken to disseminate guidelines – after China published the guideline against IV  
56  
57 27 magnesium sulfate for AMI in 2001,<sup>8</sup> the textbook used in all Chinese medical  
58  
59 28 colleges had not stopped recommending IV magnesium sulfate use in patients with  
60

1 AMI until 2009.<sup>25</sup> Second, China's hospital system is short for mechanisms to  
2 facilitate the implementation of guideline recommendations, and systematic  
3 approaches for monitoring the performance of hospitals and physicians in following  
4 the guidelines are lacking in China.<sup>26</sup>

5  
6 The successful de-adoption of non-beneficial or potentially harmful therapies for  
7 corresponding disease, which could reduce costs and potentially prevent  
8 complications, requires more than increased efforts from the part of guideline  
9 developers.<sup>12</sup> After the dissemination of the guideline, more complicated issues need  
10 to be addressed, including how to develop tools reminding and alerting physicians  
11 when non-recommended therapies are ordered, how to establish a system to report  
12 feedback periodically on the appropriateness of treatment by practitioners and  
13 hospitals, how to design an accountability-oriented mechanism to prohibit ineffective  
14 regimen being prescribed, etc. These issues could only be properly addressed  
15 through collaborations with researchers, educators, policymakers and other  
16 stakeholders.<sup>27 28</sup>

17  
18 This study has several limitations that warrant consideration. First, we could not  
19 exclude patients with some indications, such as magnesium sulfate deficiency and  
20 episodes of Torsade de pointes. However, we estimate that this number is relatively  
21 small given previous reports documenting a low prevalence of magnesium sulfate  
22 deficits in AMI patients.<sup>29 30</sup> Second, we did not have the ability to prospectively ask  
23 clinicians why they were prescribing IV magnesium sulfate, which limited our  
24 capability to gain better understanding of the use pattern and influencing factors.  
25 Third, our data were acquired retrospectively through medical record abstraction.  
26 Thus, the quality of our data depends on the accuracy and completeness of prior  
27 documentation and abstraction. Nevertheless, the standardized procedures for  
28 abstraction of medical records ensure the reliability of our results in describing the

1 use pattern of magnesium sulfate in the real world. Finally, we analyzed the data at  
2 the hospital level and were not able to determine whether the observed patterns  
3 were due to only a few physicians, or were common throughout a hospital's staff.

4  
5 In conclusion, the de-adoption of magnesium sulfate for patients with AMI is  
6 suboptimal, moreover, the decrease of rate was slowing down recently, steady at an  
7 unacceptably high level. Our findings highlight the need for more efficient  
8 mechanisms to translate evidence-based therapies into clinical practice in China to  
9 improve patients' outcomes and reduce medical waste.

## 10 **ACKNOWLEDGMENTS**

11 We appreciate the multiple contributions made by study teams at National Clinical  
12 Research Center of Cardiovascular Diseases and Yale-New Haven Hospital Center  
13 for Outcomes Research and Evaluation in study design and operations, particularly  
14 the data collection by Yi Pi, Jiamin Liu, Wuhanbilige Hundei, Haibo Zhang, Lihua  
15 Zhang, Wenchi Guan, Xiaofang Yan, Yuan Yu, Xiqian Huo, Xin Zheng, and Yuanlin  
16 Guo. We appreciate the editing by Aoxi Tian. We are grateful for the support  
17 provided by the Chinese government.

## 18 **CONTRIBUTORS**

19  
20 XL, JL and HMK conceived the China PEACE study and take responsibility for all  
21 aspects of it. XW, XD, JL, FAM, JAS, JL, HMK and XL designed the study. XW and  
22 XD wrote the first draft of the article, with further contributions from HY, EB, ND, JAS,  
23 FAM, JL, WG, HMK and XL. SH, YG and XB did statistical analysis. XL had full  
24 access to all the data in the study and take responsibility for the integrity of the data  
25 and the accuracy of the data analysis. All authors interpreted data and approved the  
26 final version of the article.

## 1 DISCLOSURES

2 There are no relevant conflicts of interest.

## 4 FUNDING

5 This project was partly supported by the National Key Research and Development  
6 Program (2017YFC1310803, 2017YFC1310801, 2015BAI12B01) from the Ministry  
7 of Science and Technology of China, the Major Public Health Service Project from  
8 the Ministry of Finance and National Health and Family Planning Commission of  
9 China, the 111 Project from the Ministry of Education of China (B16005). Dr.  
10 Krumholz is supported by grant U01 HL105270-05 (Center for Cardiovascular  
11 Outcomes Research at Yale University). The sponsors had no role in the conduct of  
12 the study; in the collection, management, analysis, and interpretation of the data; or  
13 in the preparation or approval of the manuscript.

## 15 DATA SHARING STATEMENT

16 Extra data is available by emailing [xi.li@fwoxford.org](mailto:xi.li@fwoxford.org).

## 20 REFERENCE

- 21 1. Horner SM. Efficacy of intravenous magnesium in acute myocardial infarction  
22 in reducing arrhythmias and mortality. Meta-analysis of magnesium in  
23 acute myocardial infarction. *Circulation* 1992;86(3):774-9. [published  
24 Online First: 1992/09/01]
- 25 2. Teo KK, Yusuf S, Collins R, et al. Effects of intravenous magnesium in suspected  
26 acute myocardial infarction: overview of randomised trials. *BMJ*  
27 1991;303(6816):1499-503. [published Online First: 1991/12/14]
- 28 3. Thogersen AM, Johnson O, Wester PO. Effects of magnesium infusion on  
29 thrombolytic and non-thrombolytic treated patients with acute myocardial

- 1  
2  
3  
4 1 infarction. *Int J Cardiol* 1993;39(1):13-22. [published Online First:  
5 2 1993/04/01]  
6  
7 3 4. ISIS-4: a randomised factorial trial assessing early oral captopril, oral  
8  
9 4 mononitrate, and intravenous magnesium sulphate in 58,050 patients with  
10  
11 5 suspected acute myocardial infarction. ISIS-4 (Fourth International Study  
12  
13 6 of Infarct Survival) Collaborative Group. *Lancet* 1995;345(8951):669-85.  
14  
15 7 [published Online First: 1995/03/18]  
16  
17 8 5. Early administration of intravenous magnesium to high-risk patients with acute  
18  
19 9 myocardial infarction in the Magnesium in Coronaries (MAGIC) Trial: a  
20  
21 10 randomised controlled trial. *Lancet* 2002;360(9341):1189-96. [published  
22  
23 11 Online First: 2002/10/29]  
24  
25 12 6. Antman EM, Anbe DT, Armstrong PW, et al. ACC/AHA guidelines for the  
26  
27 13 management of patients with ST-elevation myocardial infarction--  
28  
29 14 executive summary: a report of the American College of  
30  
31 15 Cardiology/American Heart Association Task Force on Practice Guidelines  
32  
33 16 (Writing Committee to Revise the 1999 Guidelines for the Management of  
34  
35 17 Patients With Acute Myocardial Infarction). *Circulation* 2004;110(5):588-  
36  
37 18 636. doi: 10.1161/01.cir.0000134791.68010.fa [published Online First:  
38  
39 19 2004/08/04]  
40  
41 20 7. Ryan TJ, Anderson JL, Antman EM, et al. ACC/AHA guidelines for the  
42  
43 21 management of patients with acute myocardial infarction. A report of the  
44  
45 22 American College of Cardiology/American Heart Association Task Force on  
46  
47 23 Practice Guidelines (Committee on Management of Acute Myocardial  
48  
49 24 Infarction). *J Am Coll Cardiol* 1996;28(5):1328-428. [published Online First:  
50  
51 25 1996/11/01]  
52  
53 26 8. China Society of Cardiology of Chinese Medical Association EBoCJoC. Guideline  
54  
55 27 for diagnosis and treatment of patients with acute myocardial infarction.  
56  
57 28 *Chinese Circulation Journal* 2001;16(6):407-22.  
58  
59 29 9. Gambassi G, Forman DE, Lapane KL, et al. Management of heart failure among  
60  
30 very old persons living in long-term care: has the voice of trials spread? The  
31  
32 SAGE Study Group. *Am Heart J* 2000;139(1 Pt 1):85-93. [published Online  
33  
34 First: 2000/01/05]  
35  
36 10. Kim N, Gross C, Curtis J, et al. The impact of clinical trials on the use of hormone

- 1  
2  
3  
4 1 replacement therapy. A population-based study. *J Gen Intern Med*  
5 2 2005;20(11):1026-31. doi: JGI221 [pii]  
6  
7 3 10.1111/j.1525-1497.2005.0221.x [published Online First: 2005/11/26]  
8  
9 4 11. Stafford RS, Furberg CD, Finkelstein SN, et al. Impact of clinical trial results on  
10 5 national trends in alpha-blocker prescribing, 1996-2002. *JAMA*  
11 6 2004;291(1):54-62. doi: 10.1001/jama.291.1.54 [published Online First:  
12 7 2004/01/08]  
13  
14 8 12. Hauptman PJ, Schnitzler MA, Swindle J, et al. Use of nesiritide before and after  
15 9 publications suggesting drug-related risks in patients with acute  
16 10 decompensated heart failure. *JAMA* 2006;296(15):1877-84. doi:  
17 11 10.1001/jama.296.15.1877 [published Online First: 2006/10/19]  
18  
19 12 13. Niven DJ, Rubenfeld GD, Kramer AA, et al. Effect of published scientific  
20 13 evidence on glycemic control in adult intensive care units. *JAMA Intern Med*  
21 14 2015;175(5):801-9. doi: 10.1001/jamainternmed.2015.0157 [published  
22 15 Online First: 2015/03/17]  
23  
24 16 14. Dharmarajan K, Li J, Li X, et al. The China Patient-Centered Evaluative  
25 17 Assessment of Cardiac Events (China PEACE) retrospective study of acute  
26 18 myocardial infarction: study design. *Circulation Cardiovascular quality and*  
27 19 *outcomes* 2013;6(6):732-40. doi: 10.1161/circoutcomes.113.000441  
28 20 [published Online First: 2013/11/14]  
29  
30 21 15. Yin ES, Downing NS, Li X, et al. Organizational culture in cardiovascular care in  
31 22 Chinese hospitals: a descriptive cross-sectional study. *Bmc Health Services*  
32 23 *Research* 2015;15(1):569.  
33  
34 24 16. Singer SJ, Moore SC, Meterko M, et al. Development of a short-form Learning  
35 25 Organization Survey: the LOS-27. *Med Care Res Rev* 2012;69(4):432-59. doi:  
36 26 10.1177/1077558712448135  
37  
38 27 17. Xing SG, Rosenbaum PR. Comparison of Multivariate Matching Methods:  
39 28 Structures, Distances, and Algorithms. *Journal of Computational &*  
40 29 *Graphical Statistics* 1993;2(4):405-20.  
41  
42 30 18. Ziegelstein RC, Hilbe JM, French WJ, et al. Magnesium use in the treatment of  
43 31 acute myocardial infarction in the United States (observations from the  
44 32 Second National Registry of Myocardial Infarction). *Am J Cardiol*  
45 33 2001;87(1):7-10. [published Online First: 2001/01/04]

- 1  
2  
3  
4 19. Yiping Chen LJ, Qiuli Zhang, Xiaoshuai Wei, Xi Li, Margaret Smith, Zhengming  
5 2 Chen. Doctor-reported hospital management of acute coronary syndrome  
6 3 in China: A nationwide survey of 1029 hospitals in 30 provinces. *World*  
7 4 *Journal of Cardiovascular Diseases* 2012;2:168-76. doi:  
8 5 10.4236/wjcd.2012.23029 Published Online July 2012
- 6 20. Abraham AS, Rosenmann D, Kramer M, et al. Magnesium in the prevention of  
7 7 lethal arrhythmias in acute myocardial infarction. *Arch Intern Med*  
8 8 1987;147(4):753-5. [published Online First: 1987/04/01]
- 9 21. Rapaport E. Guidelines for the acute coronary syndromes. *Current cardiology*  
10 9 *reports* 2001;3(4):289-98. [published Online First: 2001/06/19]
- 11 22. Raghu C, Peddeswara Rao P, Seshagiri Rao D. Protective effect of intravenous  
12 10 magnesium in acute myocardial infarction following thrombolytic therapy.  
13 11 *Int J Cardiol* 1999;71(3):209-15. [published Online First: 2000/01/15]
- 14 23. Zhou H, Sun M. Suppression of thrombolysis-induced reperfusion arrhythmias  
15 12 in acute myocardial infarction by magnesium sulfate. *Journal of Clinical*  
16 13 *Cardiology* 2000;16(4):156-58.
- 17 24. Bradley EH, Curry LA, Spatz ES, et al. Hospital strategies for reducing risk-  
18 14 standardized mortality rates in acute myocardial infarction. *Ann Intern*  
19 15 *Med* 2012;156(9):618-26. doi: 10.7326/0003-4819-156-9-201205010-  
20 16 00003
- 21 25. Lu Z, Zhong N. Internal Medicine (The seventh edition). Beijing: People's  
22 17 Medical Publishing House 2009.
- 23 26. Jiang L, Krumholz HM, Li X, et al. Achieving best outcomes for patients with  
24 18 cardiovascular disease in China by enhancing the quality of medical care  
25 19 and establishing a learning health-care system. *Lancet*  
26 20 2015;386(10002):1493-505.
- 27 27. Carrese JA, Malek J, Watson K, et al. The essential role of medical ethics  
28 21 education in achieving professionalism: the Romanell Report. *Academic*  
29 22 *medicine : journal of the Association of American Medical Colleges*  
30 23 2015;90(6):744-52. doi: 10.1097/acm.0000000000000715 [published  
31 24 Online First: 2015/04/18]
- 32 28. Grimshaw J, Eccles M, Tetroe J. Implementing clinical guidelines: current  
33 25 evidence and future implications. *The Journal of continuing education in the*



- 1  
2  
3  
4 1 *health professions* 2004;24 Suppl 1:S31-7. doi: 10.1002/chp.1340240506  
5 2 [published Online First: 2005/02/17]  
6  
7 3 29. Kafka H, Langevin L, Armstrong PW. Serum magnesium and potassium in acute  
8  
9 4 myocardial infarction. Influence on ventricular arrhythmias. *Arch Intern*  
10 5 *Med* 1987;147(3):465-9. [published Online First: 1987/03/01]  
11  
12 6 30. Romano TJ. Serum magnesium levels may not indicate low tissue magnesium  
13  
14 7 levels. *Arch Intern Med* 1997;157(4):460. [published Online First:  
15  
16 8 1997/02/24]  
17  
18  
19  
20  
21  
22  
23  
24  
25  
26  
27  
28  
29  
30  
31  
32  
33  
34  
35  
36  
37  
38  
39  
40  
41  
42  
43  
44  
45  
46  
47  
48  
49  
50  
51  
52  
53  
54  
55  
56  
57  
58  
59  
60

For peer review only



**Table 1. Baseline characteristics of using IV magnesium sulfate**

| Characteristics                   | Overall     | Use N(%)   | Non-Use(%)  | P value |
|-----------------------------------|-------------|------------|-------------|---------|
| <b>Patient characteristics</b>    |             |            |             |         |
| Age                               |             |            |             | .234    |
| <55                               | 5262(21.5)  | 938(21.3)  | 4324(21.6)  |         |
| 55-64                             | 5821(23.8)  | 1072(24.4) | 4749(23.7)  |         |
| 65-74                             | 6989(28.6)  | 1290(29.4) | 5699(28.5)  |         |
| >=75                              | 6346(26)    | 1094(24.9) | 5252(26.2)  |         |
| Gender                            |             |            |             | .144    |
| Female                            | 7257(29.7)  | 1346(30.6) | 5911(29.5)  |         |
| Male                              | 17161(70.3) | 3048(69.4) | 14113(70.5) |         |
| Hypertension                      | 12551(51.4) | 2247(51.1) | 10304(51.5) | .7      |
| Diabetes                          | 4758(19.5)  | 768(17.5)  | 3990(19.9)  | <.001   |
| Dyslipidemia                      | 1588(6.5)   | 235(5.3)   | 1353(6.8)   | <.001   |
| Currently smoking                 | 8084(33.1)  | 1496(34)   | 6588(32.9)  | .144    |
| Prior ischemic stroke             | 2706(11.1)  | 546(12.4)  | 2160(10.8)  | .002    |
| Prior myocardial infarction       | 2504(10.3)  | 416(9.5)   | 2088(10.4)  | .057    |
| Prior CABG/PCI                    | 713(2.9)    | 104(2.4)   | 609(3)      | .016    |
| Chest discomfort                  | 22211(91)   | 4021(91.5) | 18190(90.8) | .161    |
| Left branch block at presentation | 342(1.4)    | 65(1.5)    | 277(1.4)    | .624    |
| Cardiac arrest at presentation    | 271(1.1)    | 81(1.8)    | 190(0.9)    | <.001   |
| Cardiogenic shock at presentation | 1436(5.9)   | 279(6.3)   | 1157(5.8)   | .145    |
| Acute stroke at presentation      | 530(2.2)    | 77(1.8)    | 453(2.3)    | .036    |
| Heart rate at presentation, bpm   |             |            |             | .052    |
| <50                               | 1019(4.2)   | 177(4)     | 842(4.2)    |         |
| 50-110                            | 21760(89.1) | 3886(88.4) | 17874(89.3) |         |
| >110                              | 1639(6.7)   | 331(7.5)   | 1308(6.5)   |         |
| SBP at presentation, mmHg         |             |            |             | .004    |
| <120                              | 8181(33.5)  | 1565(35.6) | 6616(33)    |         |
| 120-139                           | 7534(30.9)  | 1299(29.6) | 6235(31.1)  |         |
| 140-159                           | 5041(20.6)  | 913(20.8)  | 4128(20.6)  |         |
| >=160                             | 3662(15)    | 617(14)    | 3045(15.2)  |         |
| Reperfusion therapies             |             |            |             | <.001   |
| No reperfusion                    | 18720(76.7) | 3130(71.2) | 15590(77.9) |         |
| Fibrinolytic therapy              | 3136(12.8)  | 746(17)    | 2390(11.9)  |         |
| Primary PCI                       | 2562(10.5)  | 518(11.8)  | 2044(10.2)  |         |
| <b>Hospital characteristics</b>   |             |            |             |         |
| Teaching hospital                 | 19081(78.1) | 3462(78.8) | 15619(78)   | .252    |
| Hospital level                    |             |            |             | .075    |

|    |                            |             |            |             |
|----|----------------------------|-------------|------------|-------------|
| 1  |                            |             |            |             |
| 2  |                            |             |            |             |
| 3  | Secondary or lower         | 9045(37)    | 1576(35.9) | 7469(37.3)  |
| 4  | Tertiary hospital          | 15373(63)   | 2818(64.1) | 12555(62.7) |
| 5  |                            |             |            |             |
| 6  | Economic geographic region |             |            | .01         |
| 7  |                            |             |            |             |
| 8  | Eastern                    | 13614(55.8) | 2360(53.7) | 11254(56.2) |
| 9  | Central                    | 5886(24.1)  | 1115(25.4) | 4771(23.8)  |
| 10 | Western                    | 4918(20.1)  | 919(20.9)  | 3999(20)    |
| 11 |                            |             |            |             |
| 12 | Urban/Rural                |             |            | .003        |
| 13 |                            |             |            |             |
| 14 | Rural                      | 10064(41.2) | 1724(39.2) | 8340(41.7)  |
| 15 | Urban                      | 14354(58.8) | 2670(60.8) | 11684(58.3) |

For peer review only

1  
2  
3 **Figure 1. Flowchart of study cohort**  
4

5  
6  
7 **Figure 2. Trends of intravenous magnesium sulfate therapy in 2001, 2006, 2011**  
8 **and 2015 in five economic-geographic regions.**  
9

10  
11  
12  
13 **Figure 3. IV magnesium sulfate use in 2001, 2006, 2011 and 2015 among all**  
14 **hospitals.**  
15

16  
17  
18  
19 **Figure 4. In-hospital outcomes between patients with and without IV**  
20 **magnesium sulfate.**  
21  
22  
23  
24  
25  
26  
27  
28  
29  
30  
31  
32  
33  
34  
35  
36  
37  
38  
39  
40  
41  
42  
43  
44  
45  
46  
47  
48  
49  
50  
51  
52  
53  
54  
55  
56  
57  
58  
59  
60

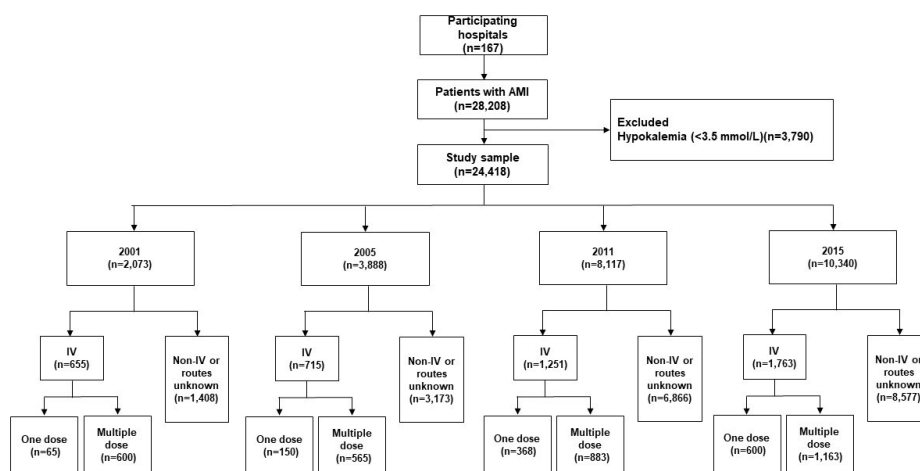

Figure 1

338x190mm (96 x 96 DPI)

1  
2  
3  
4  
5  
6  
7  
8  
9  
10  
11  
12  
13  
14  
15  
16  
17  
18  
19  
20  
21  
22  
23  
24  
25  
26  
27  
28  
29  
30  
31  
32  
33  
34  
35  
36  
37  
38  
39  
40  
41  
42  
43  
44  
45  
46  
47  
48  
49  
50  
51  
52  
53  
54  
55  
56  
57  
58  
59  
60

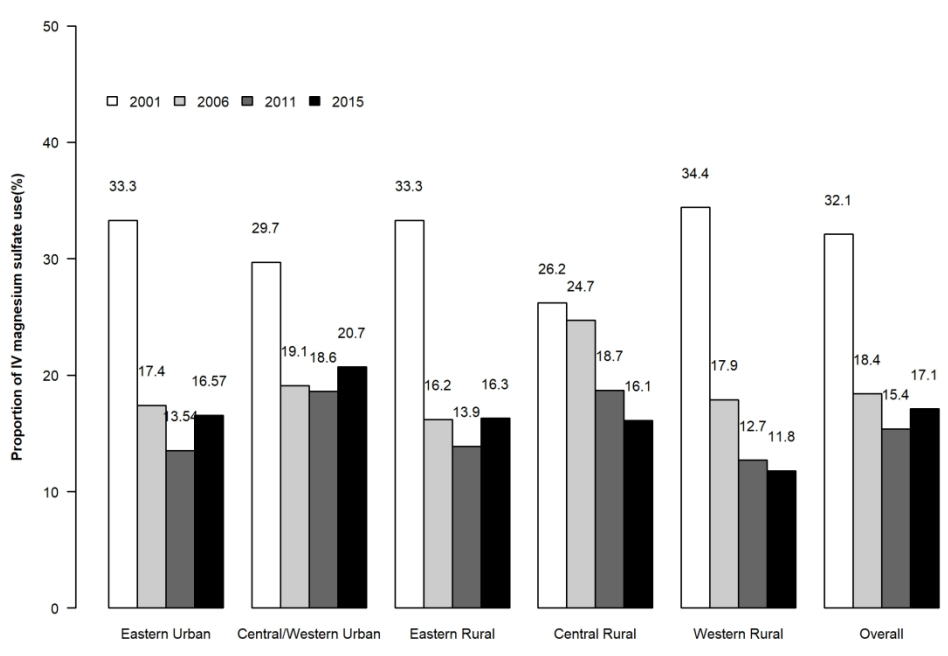

Figure 2

179x119mm (300 x 300 DPI)

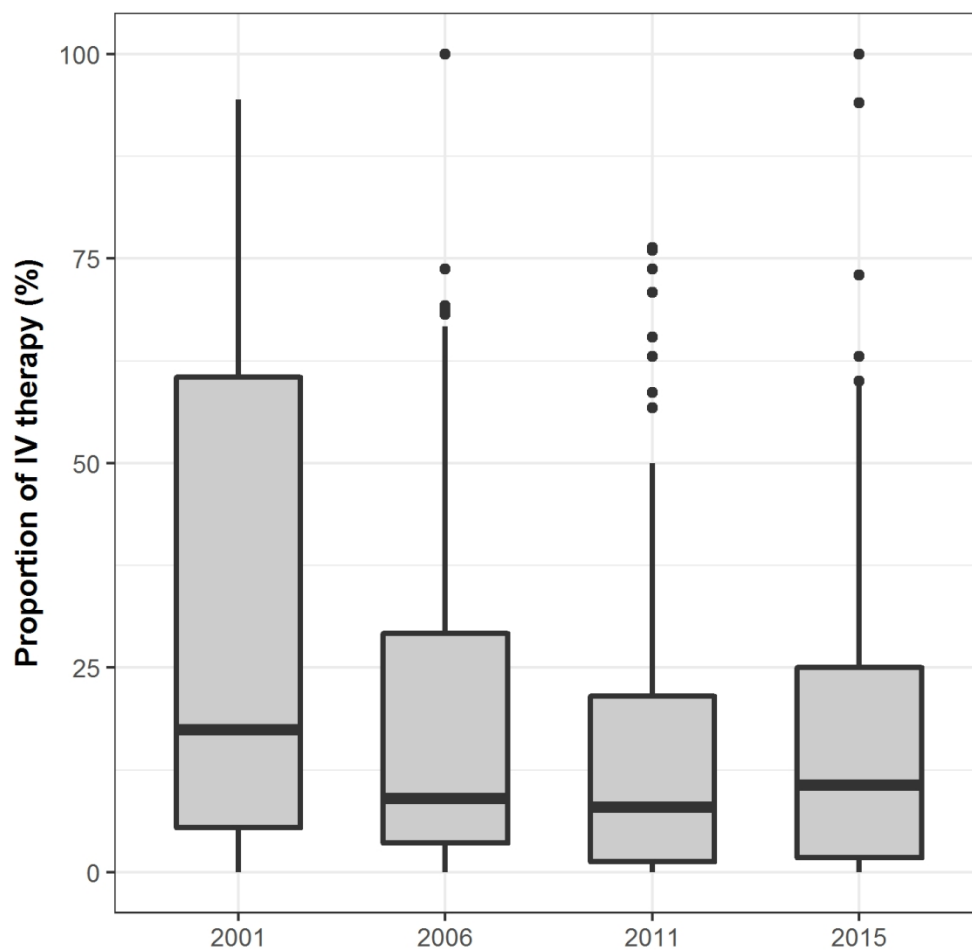

Figure 3

127x127mm (300 x 300 DPI)

1  
2  
3  
4  
5  
6  
7  
8  
9  
10  
11  
12  
13  
14  
15  
16  
17  
18  
19  
20  
21  
22  
23  
24  
25  
26  
27  
28  
29  
30  
31  
32  
33  
34  
35  
36  
37  
38  
39  
40  
41  
42  
43  
44  
45  
46  
47  
48  
49  
50  
51  
52  
53  
54  
55  
56  
57  
58  
59  
60

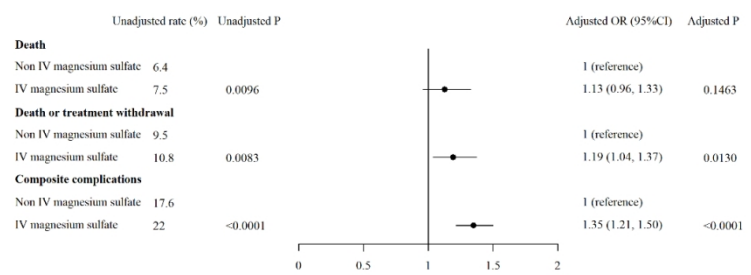

Figure 4

163x78mm (220 x 220 DPI)

## APPENDIX

### A. China PEACE-Retrospective AMI Study Site Investigators by Hospital

Aba Tibetan and Qiang Autonomous Prefecture People's Hospital, ShipingWeng, ShuyingXie;  
Affiliated Hospital of Guiyang Medical College, Lirong Wu, Jiulin Chen; Affiliated Hospital of Hainan  
Medical College, Tianfa Li, Jun Wang; Affiliated Zhongshan Hospital of Dalian University, Qin Yu,  
Xiaofei Li; Alxa League Central Hospital, Zhong Li, ShiguoHao, Yuzhen Zhang, Xuemei Wu;  
Baiquan County People's Hospital, Yachen Zhang, Zhifeng Liu; Biyang People's Hospital, Zhongxin  
Wang, HaoJia; Bortala Mongol Autonomous Prefecture People's Hospital, Bayin Bate, BadengQiqige;  
Changda Hospital Of Anshan, Xiang Jin, Ting Cai; Chengwu County People's Hospital, Fengqin Liu,  
Dayong Xu; Chenxi County People's Hospital, Xuejin He, Shui Yang; Chongren County People's  
Hospital, Chun Yuan, Jiping Wang; County People's Hospital of Jinning, LihuaGu, Lin Li, Shijiao  
Chen; Dalian Municipal Central Hospital, YongchaoZhi, Lili Sun; Dao County People's Hospital,  
Shengcheng Zhou, Lingjiao Jin; Daofu County People's Hospital, Yong Leng, Liangchuan Zhang,  
Tianyun Deng; Dingyuan County People's Hospital of Anhui Province, Yuanjin Wang, Wenhua Zhang,  
Xinmin Ma; Dongyang People's Hospital, Weimin Li, Liang Lu, Xuan Ge; Dulong and Nu  
Autonomous County People's Hospital of Gongshan, Xiaoping Wu, Yanming He; Dunhua City  
Hospital of Jilin Province, FanjuMeng, Jia Li; Fenghuang County People's Hospital, Dexi Liao,  
Guangyong Liu, Wen Qin; Fengshan County People's Hospital, Wen Long, Xiangwen Chen; Fourth  
Hospital of Baotou City, Baohong Zhang, Yonghou Yin, Bin Tian; Fourth People's Hospital of Zigong  
City, Yong Yi, Chaoyong Wu; Fugu County People's Hospital of Shaanxi Province, Baoqi Liu, Zhihui  
Zhao, Haiming Li; Fujian Provincial Hospital, YansongGuo, Xinjing Chen; Fuling Center Hospital of  
Chongqing City, Liquan Xiang, Lin Ning; Gannan County People's Hospital, Mei Chen, Xin Jin,  
Guiling Li; General Hospital of the Yangtze River Shipping, Xiuqi Li, Xing'an Wu; Gongcheng Yao  
Autonomous County People's Hospital, Congjun Tan, Mingfang Feng, Meili Wang; Guangchang  
County People's Hospital, Liangfa Wen, Xiang Fu, QunxingXie; Guilin People's Hospital, Wei Zhang,  
Yanni Zhuang, Hua Lu; Guiping People's Hospital, Jiaqian Lu, Yu Huang; Haerbin 242 Hospital, Yin  
Zhou, Qiuling Hu; Haiyan People's Hospital, Chunhui Xiao, Xiaoli Hu; Heling Ge Er County People's  
Hospital, Yongshuan Wu, Qiuli Wang; Helong Municipal People's Hospital, Youlin Xu, Xuefei Yu;



1  
2  
3  
4 Henan Provincial People's Hospital, Chuanyu Gao, Jianhong Zhang, You Zhang; Heze Municipal  
5 Hospital, WentangNiu, Xiaolei Ma, Yong Wang; HGKY Group Company General Hospital, Xiaowen  
6 Pan, Yanlong Liu; Hua Xin HospitalFirst Hospital of Tsinghua University, Lifu Miao, Yanping Yin,  
7 Zhiying Zhang; Huairen People's Hospital, Shutang Feng; Huayin People's Hospital, Aiping Wang,  
8 Jiangli Zhang, Feipeng Li; Huaying People's Hospital , Hong Wang; Hunchun Hospital, Lijun Yu,  
9 Xinxin Zhao; Huizhou Municipal Central Hospital, Yuansheng Shen, Zhiming Li, Lizhen He; Hunan  
10 Province Mawangdui Hospital, ZhiyiRong, Wei Luo; Ji'an Municipal Central People's hospital,  
11 Xueqiao Wang; Jianghua Yao Autonomous County People's Hospital, Rongjun Wan, Jianglin Tang,  
12 Guanghan Wu; Jiangsu Haimen People's Hospital, Jie Wu, Bin Xu; Jiangxi Provincial People's  
13 Hospital, Qing Huang, Xiaohe Wu; Jiangzi County People's Hospital, Sang Ge, Pian Pu, PingcuoDuoji;  
14 Jilin Province People's Hospital, Hui Dai, Yuming Du, Wei Guo; Jilin Integrated Traditional Chinese  
15 & Western Medicine Hospital, Jilin Province, Jianping Shi; Jinghai County Hospital, Peihua Zhao,  
16 Jingsheng Sun; Jingxi County People's Hospital, Hongxiang Li, Wen Liang; Jingxing County Hospital,  
17 Zhiwen Dong, Zhenhai Zhao; Jingzhou Central Hospital, Xin Li, Qin Xu; Jiuquan City People's  
18 Hospital, Yaofeng Yuan, Zhirong Li; Jixi People's Hospital of The Jixi Municipal People's Hospital  
19 Medical Group, Jinbo Gao; Jize County Hospital, Qiu'eGuo; Kangbao County People's Hospital,  
20 Ruiqing Zhao, Guangjun Song; Keshiketengqi Hospital of Chifeng City, Lize Wang, Haiyun Song;  
21 Lanping Bai and Pumi Autonomous County People's Hospital, Jinwen He, Jinming He; Laoting  
22 County Hospital, Keyong Shang, Changjiang Liu, Kuituan Xi; Liaoyang Central Hospital, Rihui Liu,  
23 Peng Guo; Liaoyuan Central Hospital, ChaoyangGuo, Xiangjun Liu, Rujun Zhao, Zeyong Yu; Lindian  
24 County Hospital, Wenzhou Li, Xudong Jing, Huanling Wang; Linxiang People's Hospital, Xiyuan  
25 Zhao, Chao Zhang, Long Chen; Liujiang County People's Hospital, Meifa Wei, Yan Liu, Shengde  
26 Chen; Longyan First Hospital, Kaihong Chen, Yong Fang, Ying Liao; Luancheng County Hospital,  
27 Junli Wang, Tianyu Liu, Suzhe Cheng; Lucheng People's Hospital, Yunke Zhou, XiaoxiaNiu, Huifang  
28 Cao; Luchuan County People's Hospital, Zebin Feng, Min Feng; Luxi County People's Hospital,  
29 FeilongDuan, Haiming Yi; Luyi County People's Hospital, Yuanxun Xu, AnranGuo; Macheng People's  
30 Hospital, Xianshun Zhou, HongzhuanCai, Peng Zheng; Mengcheng First People's Hospital,  
31 GaofengGuo; MenglianLahudaiwa autonomous counties People's Hospital, Xiang Li; Min County  
32  
33  
34  
35  
36  
37  
38  
39  
40  
41  
42  
43  
44  
45  
46  
47  
48  
49  
50  
51  
52  
53  
54  
55  
56  
57  
58  
59  
60

1  
2  
3  
4 People's Hospital, MinwuBao, Yuhong Liu; Nanjing First Hospital, Shaoliang Chen, HaiboJia,  
5  
6 Hongjuan Peng; Nan'an Hospital, Duanping Dai, Shaoxiong Hong; Nantong Third People's Hospital,  
7  
8 Song Chen, Dongya Zhang, Ying Wang; Nanyang Central Hospital, Yudong Li, Jianbu Gao,  
9  
10 Shouzhong Yang; Ningwu County People's Hospital, Junhu An; Peking University People's Hospital,  
11  
12 Chenyang Shen, Yunfeng Liu; Peking University Shenzhen Hospital, Chun Wu, Huan Qu, Saiyong  
13  
14 Chen; People's Hospital of Jingyu, Yuhui Lin, Dehai Jiao; People's Hospital of Yueqing City, Manhong  
15  
16 Wang, Qiu Wang; Pianguan County People's Hospital, YingliangXue, Ruijun Zhang; Puding County  
17  
18 People's Hospital, Cheng Yuan, Lei Wu; Qinghai Red Cross Hospital, Jianqing Zhang, Chunmei Wei,  
19  
20 Yanmei Shen; Qinshui County People's Hospital, Hehua Zhang, Hongmei Pan, Yong Gao; Qinyang  
21  
22 People's Hospital, Xiaowen Ma, Yanli Liang, Tianbiao Wang; Queshan County People's Hospital,  
23  
24 Daguo Zhao; Quzhou People's Hospital, XiaomingTu, Zhenyan Gao; Rongjiang County People's  
25  
26 Hospital, Fangning Wang, Qiang Yang; Rudong County People's Hospital, Xiaoping Kang, Jianbin  
27  
28 Fang, Dongmei Liu; Ruyang County People's Hospital, Chengning Shen, Mengfei Li; Shangluo  
29  
30 Central Hospital, Yingmin Guan, Wenfeng Wang, Ting Xiao; ShangqiuChangzheng People's Hospital,  
31  
32 Qian Wang; Shaoyang County People's Hospital, Fengyun Jiang, Kaiyou Wu; Shengsi People's  
33  
34 Hospital, Songguo Wang; Shenyang Weikang Hospital, Xujie Fu, Shu Zhang, Lifang Gao;  
35  
36 ShougangShuicheng Iron & Steel (Group) Co., Ltd. General Hospital, Min Zhang, Kai Fu,  
37  
38 XiaojingDuan; Shuangshan Hospital Of Anshan, Rui Xiao, Ruixia Wu, Bin Li; Siziwang County  
39  
40 People's Hospital, Hongtu Zhang, Yuerong Ma, Zhonghui Cao; SunanYugur Autonomous County  
41  
42 People's Hospital, Zhansheng Ba, Wanhai Fu; Taizhou Hospital of Zhejiang Province, Jianjun Jiang,  
43  
44 YafeiMi, Weiwei Zhou; The Affiliated Hospital of Beihua University, Feng Sun, Qi Zhang, Shiyu  
45  
46 Zheng; The Fifth People's Hospital of Dalian, Jing Zhang, Yang Zhong; The First Affiliated Hospital  
47  
48 of Hebei North University, Fangjiang Li, Xiaoyuan Wang; The First Affiliated Hospital of Henan  
49  
50 University of Science & Technology, Pingshuan Dong, Laijing Du, Wei Liu; The First Affiliated  
51  
52 Hospital Of Jia Mu Si University, Zhaofa He, Meihua Jin; The First Hospital of Fuzhou City, Ting  
53  
54 Jiang, Zhuoyan Chen; The First Hospital of Xi'an, Manli Cheng, YuqiangJi; The First People's  
55  
56 Hospital of Danzhou, Youhua Zhou, Jyuan Li; The First People's Hospital of Guangzhou, Yizhi Pan,  
57  
58 Jian Liu; The First People's Hospital of Guangyuan, Tianxun Wang, Ping Yang; The Fourth People's  
59  
60

1  
2  
3  
4 Hospital of Shangqiu Shi, Guiyu Huang, JianjunPan, QingliangCai, Qianying Wang; The General  
5  
6 Hospital of Yongzhou, Hunan Province, MingliLv; The people's hospital of Wuchuan, Yuanming Yi,  
7  
8 Xuelian Deng; The People's Hospital of Yuanling, Wenhua Chen, RongCai; The People's Hospital of  
9  
10 Zhijiang City, Bing Zhang; The Second Affiliated Hospital of Harbin Medical University, Bo Yu,  
11  
12 Yousheng Xu, Zhengqiu Wang; The Second Affiliated Hospital of Kunming Medical University, Jun  
13  
14 Shu, Ge Zhang, Kai Li; The Second Central Hospital of Baoding City, Guang Ma, PuxiaSuo; The  
15  
16 Second People's Hospital of Liaoyuan City, Aimin Zhang, Yongfen Kang; Tianjin Medical University  
17  
18 General Hospital, Zheng Wan, Yuemin Sun, Bo Bian; Tibet Autonomous Region People's Hospital,  
19  
20 Xuejun Hu, DawaCiren; Tongchuan Mining Bureau Central Hospital, GuojiongJia, Jieli Pan;  
21  
22 Tongliang County People's Hospital, Guofu Li, Hongliang Zhang, Longliang Zhan; Tongliao City  
23  
24 Horqin District First People's Hospital, Junping Fang, Xinli Yu; Ulanqab Central Hospital, Dacheng  
25  
26 Wang, Dajun Liu, Xinhong Cao; Wencheng County People's Hospital, Yi Tian,  
27  
28 HaishengZhu, Wanchuan Liu; Wuhai People's Hospital, Zhaohai Zhou, Lei Shi; Wuhu Second People's  
29  
30 Hospital, Wuwang Fang, Manxin Chen; Wulate County People's  
31  
32 Hospital, FuqinHan, JianyeFu, Yunmei Wang; Wuqiang County People's Hospital, Binglu Liu,  
33  
34 YanliangZhang, Xiupin Yuan; Wuyishan Municipal Hospital, Qingfei Lin, Yun Chen; Xiangtan County  
35  
36 People's Hospital, Yuliang Zhu, ZhiqiangCai; Xing County People's Hospital, Xingping Li, LirongAo;  
37  
38 Xingshan County People's Hospital, Shubing Wu, Hui Zhang; Xinmi First People's Hospital, Fusheng  
39  
40 Zhao, Guangming Yang; Xinshao County People's Hospital, Renfei Liu, Wenwei Ai; Xiuwu County  
41  
42 People's Hospital, JianbaoChang, Haijie Zhao; Xuanhan County People's Hospital, Qijun Ran, Xuan  
43  
44 Ma; Xupu County People's Hospital, Shijun Jiang, Xiaochun Shu; Yanggao County People's Hospital,  
45  
46 Zhiru Peng, Yan Han; Yanqing County Hospital, Jianbin Wang, Li Yang; Ying County People's  
47  
48 Hospital, Yu Shen, Xingcun Shang; Yitong Manchu Autonomous County First People's Hospital,  
49  
50 Haifeng Wang; Yongxing County People's Hospital, Hongyan Li, Zhisong Liao, Yang Cao; Yuanzhou  
51  
52 District People's Hospital of Guyuan City, Xiaoping Gao, MeiyongCai, Lining You; Yuncheng Central  
53  
54 Hospital, Xuexin Li, Shuqin Li, Yingjia Li; Yunlong County People's Hospital, Jianxun Yang, Song  
55  
56 Ai, Jianfei Ma; Yuyao People's Hospital, Lailin Deng; ZhangjiachuanHui Autonomous County First  
57  
58 People's Hospital, Keyu Wang, Shitang Gao, Jian Guan; Zhouning County Hospital, Banghua He,  
59  
60

1  
2  
3  
4 Youyi Lu; Zhuoni County People's Hospital, Weirong Yang, Hong Li; Zhuozi County People's  
5  
6 Hospital, Zhizhong Zhang, Xiaohong Chi; Zuoyun County People's Hospital, Ru Duan, Guangli Wang.  
7  
8  
9  
10  
11  
12  
13  
14  
15  
16  
17  
18  
19  
20  
21  
22  
23  
24  
25  
26  
27  
28  
29  
30  
31  
32  
33  
34  
35  
36  
37  
38  
39  
40  
41  
42  
43  
44  
45  
46  
47  
48  
49  
50  
51  
52  
53  
54  
55  
56  
57  
58  
59  
60

For peer review only

## **B. China PEACE hospital survey: design, conduction, and materials**

### **Participants**

In the collaborative network, we invited the principal investigator and the coordinator of each hospital to participate in the survey. The definitions of the roles were established during the planning phase of the China PEACE-Retrospective AMI Study: typically, the director of the Cardiology Department or Internal Medicine Department at each hospital served as the principal investigator, and the China PEACE study coordinator was most often a physician selected by the principal investigator.

### **Survey design**

We organized the survey in 4 sections: personal information of the respondent (part A); general information about the hospital and the department in charge of AMI care (part B); information about hospital practices relating to the diagnosis and treatment of cardiovascular heart disease (part C); and organizational learning characteristics and quality improvement for AMI care (part D). Organizational learning culture was measured using questions from the Short-Form Learning Organization Survey (LOS-27) and the Survival after AMI (SAMI) study.

The survey was written in English and translated into Chinese. To ensure accuracy, a double translation was conducted in which the survey was translated into Chinese and then back into English independently by 2 bilingual Chinese medical researchers. Modifications were made to the Chinese translation accordingly. Participants were informed at the start of the survey that their responses would be used to study institutional characteristics and medical care patterns.

### **Survey conduction**

The survey was piloted using a convenience sample of 6 hospitals with percutaneous coronary intervention capability. The principal investigators were invited to participate in the pilot, and one study coordinator also volunteered to participate. The responses of the 6 principal investigators (3 via in-person interviews and 3 via self-administered paper-based survey) and 1 study coordinator (via self-administered paper-based survey) were collected. The cognitive interviewing methodology, in which individual in-person interviews were conducted with each pilot participant, was used to assess understanding of the pilot survey. For paper-based pilot surveys, cognitive interviewing consisted of retrospective (post-survey) probes; for in-person interviews, concurrent (during survey) probes allowed

1  
2  
3  
4 participants to provide survey feedback in real-time. Based on the experience from the pilot, minor  
5  
6 revisions were made to clarify the meaning of certain questions, and the sequence of questions was  
7  
8 modified to improve logic and flow. No questions were removed or added. All data from the pilot  
9  
10 testing were included in the final data set.

11  
12 The survey was available in 2 forms: web-based e-survey, in which each participant was able to log in  
13  
14 with a unique password to a website where the survey was hosted, and PDF-based survey, in which  
15  
16 subjects digitally marked their answers in PDF files and returned the files via email. We applied 2  
17  
18 methods to ensure the quality of the responses. We checked the response data for completeness, either  
19  
20 by automatic verification (web-based) or by manual check by our staff (PDF-based), and on the basis  
21  
22 of logic. For the web-based e-survey submissions, we used automatic logic check and verification  
23  
24 while subjects were responding to the survey, and recorded total time spent on the survey. For the  
25  
26 PDF-based survey submissions, we conducted a manual logic check, focusing on whether subjects  
27  
28 correctly skipped inapplicable questions as indicated by the instructions in other parts of the survey. In  
29  
30 cases of missing or illogical (e.g., questions incorrectly skipped or completed) data for PDF-based  
31  
32 surveys, we contacted respondents by email and/or phone, informed them of which questions needed to  
33  
34 be resolved, and asked them to resubmit the survey with the necessary changes.  
35  
36  
37  
38  
39  
40  
41  
42  
43  
44  
45  
46  
47  
48  
49  
50  
51  
52  
53  
54  
55  
56  
57  
58  
59  
60

## Survey questionnaires

**A. Personal information**

- A.1 Gender:  
 Male  Female
- A.2 Education  
 Junior high school  
 Senior high school (technical school or technical secondary school)  
 College (junior college)  
 Postgraduate
- A.3 Clinical job title:  
 Consultant  Attendant  Resident  Nurse  Other, please specify: \_\_\_\_
- A.4 Senior administrative position in hospital:  
 No  Yes, please specify: \_\_\_\_
- A.5 You have been working in the department for \_\_\_\_ years.

**B. General Information of the hospital and the department**

**Instructions: This section focuses on characteristics of your hospital and department. For all questions, please reflect upon them during the 1-year period from 1/1/2011 to 12/31/2011 (for some of them, please consider 1/1/2001 to 12/31/2001, and 1/1/2006 to 12/31/2006, as specified). Even some questions in this section might be somewhat hard to answer immediately, especially those about the characteristics of your hospital or department in 2001 and 2006. Please try best to find the answer - as accurate as possible - to every applicable question.**

- B.1 Affiliated hospital of medical college:  
 No  Yes, please specify the name of the college: \_\_\_\_\_ [Skip to B3]
- B.2 Teaching hospital of medical college:  
 No  Yes, please specify the name of the college: \_\_\_\_\_
- Total No. in your department
- |                 | In 2001 | In 2006 | In 2011 |
|-----------------|---------|---------|---------|
| B.3 Beds        |         |         |         |
| B.4 Consultants |         |         |         |
| B.5 Attendants  |         |         |         |
| B.6 Residents   |         |         |         |
| B.7 Nurses      |         |         |         |
- B.8 Is there any other department in your hospital providing inpatient treatment for AMI?  
 No  Yes, please specify the name of the department: \_\_\_\_\_
- B.9 Coronary Care Unit (CCU) in hospital?  
 No  Yes, please specify the No. of beds: \_\_\_\_\_
- B.10 Cath lab in hospital?  
 No [Skip to B12]  Yes, please specify when started: \_\_\_\_\_
- B.11 How many qualified cardiac interventionalist there are in your hospital: \_\_\_\_\_  unknown
- B.12 Could CABG be performed in hospital?  
 No  Yes, please specify the No. of cases in 2011: \_\_\_\_\_

- B.13 Independent emergency department?  
 No  Yes, please specify the No. of cardiologists in charge in emergency department normally: \_\_\_\_\_
- B.14 Formal GCP training of clinical staff in your department?  
 No  Yes  Unknown
- B.15 Have your apartment participated in international clinical trials?  
 No  Yes, please specify the names of the trials: \_\_\_\_\_  Unknown
- B.16 SFDA certified site for CVD drug trials?  
 No  Yes  Unknown
- B.17 Existence of Ethics Committee in hospital?  
 No  Yes  Unknown
- Total No. in your hospital

|                                       | In 2001 | In 2006 | In 2011 |
|---------------------------------------|---------|---------|---------|
| B.18 Patients with stroke             |         |         |         |
| B.19 Patients with ischemic stroke    |         |         |         |
| B.20 Patients with hemorrhagic stroke |         |         |         |

- B.21 Independent neurology department?  
 No  Yes, please specify the No. of beds in the department: \_\_\_\_\_
- B.22 Carotid endarterectomy performed in hospital?  
 No  Yes, please specify when started: \_\_\_\_\_  Unknown
- B.23 Carotid stenting performed in hospital?  
 No  Yes, please specify when started: \_\_\_\_\_  Unknown
- The average cost of the following items in your hospital

|      | Items                                                                                    | Cost, ¥ |
|------|------------------------------------------------------------------------------------------|---------|
| B.24 | Biochemical test, including glucose, lipid, liver function, renal function, CRP or hsCRP |         |
| B.25 | Coagulation function test                                                                |         |
| B.26 | BNP or NT-proBNP                                                                         |         |
| B.27 | Stress test                                                                              |         |
| B.28 | UCG                                                                                      |         |
| B.29 | Cardiac CT                                                                               |         |
| B.30 | Carotid US                                                                               |         |

**C. Diagnosis and treatment for CHD**

**Instructions: This section focuses on hospital processes and care of patients with AMI. For all questions, please reflect upon them during the 1-year period from 1/1/2011 to 12/31/2011.**

- C.1 Routine diagnostic test of CK for ACS patients after admission?  
 No  Yes, please specify the average time delay in reporting results: \_\_\_\_\_  Unknown



- 1  
2  
3  
4  
5  
6  
7  
8  
9  
10  
11  
12  
13  
14  
15  
16  
17  
18  
19  
20  
21  
22  
23  
24  
25  
26  
27  
28  
29  
30  
31  
32  
33  
34  
35  
36  
37  
38  
39  
40  
41  
42  
43  
44  
45  
46  
47  
48  
49  
50  
51  
52  
53  
54  
55  
56  
57  
58  
59  
60
- C.2 Routine diagnostic test of CK-MB for ACS patients after admission?  
 No  Yes, please specify the average time delay in reporting results: \_\_\_\_\_  Unknown
- C.3 Routine diagnostic test of troponin for ACS patients after admission?  
 No  Yes, please specify the average time delay in reporting results: \_\_\_\_\_  Unknown
- C.4 Are patients who are stable after PCI admitted to an intensive care unit? SAMI-Q25  
 Always  Usually  Sometimes  Rarely  Unknown
- C.5 Did your emergency department use a uniform protocol to care for patients who arrived to the emergency department with STEMI? SAMI-Q26  
 No  Yes  Unknown
- C.6 Did your emergency department use a uniform protocol to care for patients who arrived to the emergency department with Unstable Angina/NSTEMI? SAMI-Q27  
 No  Yes  Unknown
- C.7 Did your hospital use simulations (i.e., trial exercises, dry-runs) to practice any of the following AMI care processes? [*Check all that apply*] SAMI-Q28  
 Door-to-balloon or door-to-drug protocols  
 Chest pain in hospitalized patients  
 Inpatient codes (e.g., cardiac arrest, respiratory failure)  
 None above  
 Unknown
- C.8 To which patient care unit were patients who were stable with Unstable Angina/NSTEMI most likely admitted? SAMI-Q29  
 CCU  ICU  Step-down unit  Designated chest pain/telemetry/cardiology floor  
 General medicine floor  We did not have a routine method of assigning beds for patients with Unstable Angina/NSTEMI  Unknown
- C.9 Did all, or nearly all, patients with AMI have a cardiologist as their primary attending physician? SAMI-Q30  
 No  Yes [**Skip to C11**]  Unknown

- 1  
2  
3  
4  
5  
6  
7  
8  
9  
10  
11  
12  
13  
14  
15  
16  
17  
18  
19  
20  
21  
22  
23  
24  
25  
26  
27  
28  
29  
30  
31  
32  
33  
34  
35  
36  
37  
38  
39  
40  
41  
42  
43  
44  
45  
46  
47  
48  
49  
50  
51  
52  
53  
54  
55  
56  
57  
58  
59  
60
- C.10 Were cardiology consults required for all patients with AMI? SAMI-Q30a
- No  Yes  Unknown
- C.11 In the intensive care unit, who was primarily responsible for the care of patients with AMI? [*Check all that apply*] SAMI-Q31
- Critical care physicians (i.e., intensivists)
- Cardiologist/s based exclusively in the unit
- Other cardiologists
- Other, please specify: \_\_\_\_\_
- Unknown
- C.12 Electronic medical record?
- No [**Skip to C14**]  Yes, please specify when started: \_\_\_\_\_  Unknown
- C.13 Did your hospital use an electronic medical record (EMR) in the following areas? [*Check all that apply*] SAMI-Q34
- Emergency department
- Inpatient floors
- Critical care units
- Affiliated ambulatory offices/clinics
- None above
- C.14 On the inpatient floors, did your hospital have the following electronic capabilities? [*Check all that apply*] SAMI-Q35
- Computerized assisted physician order entry
- Computer prompts to alert user to potential drug-drug interactions or allergies
- Computer prompts to alert user to potential errors in dosing and information
- Computer prompts to alert user to medication order expiration
- Computer prompts to improve adherence to core measures for AMI care (e.g., beta-blocker use)
- None above

- 1  
2  
3  
4  
5  
6  
7  
8  
9  
10  
11  
12  
13  
14  
15  
16  
17  
18  
19  
20  
21  
22  
23  
24  
25  
26  
27  
28  
29  
30  
31  
32  
33  
34  
35  
36  
37  
38  
39  
40  
41  
42  
43  
44  
45  
46  
47  
48  
49  
50  
51  
52  
53  
54  
55  
56  
57  
58  
59  
60
- C.15 In the emergency department, were prior ECG's electronically available at the time of care? SAMI-Q36
- No  Yes  Unknown
- C.16 Did physicians regularly use explicit protocols or clinical pathways for patients with AMI? SAMI-Q37
- No  Yes  Unknown
- C.17 Did clinicians on the inpatient care units regularly use order sets (either paper-based or electronic) for patients with STEMI? SAMI-Q38
- No  Yes  Unknown
- C.18 Did clinicians on the inpatient care units regularly use order sets (either paper-based or electronic) for with Unstable Angina/NSTEMI? SAMI-Q39
- No  Yes  Unknown
- C.19 Which of the following types of physicians were at the hospital 24-hours/day and 7-days/week?  
*[Check all that apply]* SAMI-Q42
- Critical care physicians (i.e., intensivists)
- Non-interventional cardiologists
- Interventional cardiologists
- Cardiology fellows (including non-interventional and interventional)
- Hospitalists
- None above
- C.20 Are there any protocols used to guide nurses on when to call the attending cardiologist for patients with AMI? SAMI-Q43
- No  Yes  Unknown
- C.21 Patients with acute coronary syndrome who arrived by Emergency medical service (ambulance):
- None **[Skip to C25]**  1–25%  26–50%  51–75%  76–100%
- Unknown

- 1  
2  
3  
4  
5  
6  
7  
8  
9  
10  
11  
12  
13  
14  
15  
16  
17  
18  
19  
20  
21  
22  
23  
24  
25  
26  
27  
28  
29  
30  
31  
32  
33  
34  
35  
36  
37  
38  
39  
40  
41  
42  
43  
44  
45  
46  
47  
48  
49  
50  
51  
52  
53  
54  
55  
56  
57  
58  
59  
60
- C.22 Emergency medical service routinely gives pre-alert calls?  
 No  Yes  Unknown
- C.23 Patients with acute coronary syndrome who undergo ECG en route to hospital:  
 None  1–25%  26–50%  51–75%  76–100%  Unknown
- C.24 Emergency medical service routinely tell your hospital the results of ECG?  
 No  Yes  Unknown
- C.25 Formal training of triage staff for assessing acute coronary syndrome?  
 No  Yes  Unknown
- C.26 Dedicated space in triage area for immediate ECG?  
 No  Yes  Unknown
- C.27 Written criteria for immediate ECG in emergency department?  
 No  Yes  Unknown
- C.28 Expected interval between patients' arriving and ECG?  
 ≤5 min  6–20 min  >20 min  No expected time  Unknown
- C.29 Dedicated ECG technicians in emergency department?  
 No  Yes, only some shifts  Yes, always  Unknown
- C.30 Thrombolysis for AMI patients in hospital?  
 No **[Skip to C38]**  Yes, please specify when started: \_\_\_\_\_
- C.31 Does your hospital have a set protocol to identify eligible patients for thrombolysis?  
 No  Yes  Unknown
- C.32 Does your hospital have a set protocol to assess contraindications of thrombolysis?  
 No  Yes  Unknown
- C.33 Who makes the decision about thrombolysis in your hospital?  
 Emergency medicine physician alone  
 Emergency medicine physician with a cardiac consultation  
 Only Cardiologist  
 Unknown

- 1  
2  
3  
4  
5  
6  
7  
8  
9  
10  
11  
12  
13  
14  
15  
16  
17  
18  
19  
20  
21  
22  
23  
24  
25  
26  
27  
28  
29  
30  
31  
32  
33  
34  
35  
36  
37  
38  
39  
40  
41  
42  
43  
44  
45  
46  
47  
48  
49  
50  
51  
52  
53  
54  
55  
56  
57  
58  
59  
60
- C.34 In your hospital, where do patients with AMI receive thrombolysis?
- In the emergency department
  - In the cardiology department (or general medicine department)
  - In the ICU or CCU
  - Unknown
- C.35 Where are the thrombolytic medicines stored and prepared?
- Stored and prepared in the department where thrombolysis is done
  - Prepared in the department where thrombolysis is done, but stored in another location
  - Stored and prepared in some location other than the department where thrombolysis is done
  - Unknown
- C.36 Informed Consent before thrombolysis?
- Not necessary
  - Only orally obtained informed consent is needed
  - One written informed consent form is needed
  - More than one written informed consent form is needed
  - Unknown
- C.37 Prepayment before thrombolysis?
- No
  - Yes, please specify the average amount approximately: \_\_\_\_ (“-1” if unknown)
  - Unknown
- C.38 Primary PCI was performed in your hospital for STEMI patients?
- No **[Skip to C60]**
  - Yes, please specify when started: \_\_\_\_
- C.39 Activation of catheterization laboratory on weekdays?
- Emergency medicine physician with cardiologist
  - Cardiologist alone
  - Emergency medicine physician alone
  - Unknown

- 1  
2  
3  
4  
5  
6  
7  
8  
9  
10  
11  
12  
13  
14  
15  
16  
17  
18  
19  
20  
21  
22  
23  
24  
25  
26  
27  
28  
29  
30  
31  
32  
33  
34  
35  
36  
37  
38  
39  
40  
41  
42  
43  
44  
45  
46  
47  
48  
49  
50  
51  
52  
53  
54  
55  
56  
57  
58  
59  
60
- C.40 Activation of catheterization laboratory at night and on weekends?
- Emergency medicine physician with cardiologist
  - Cardiologist alone
  - Emergency medicine physician alone
  - Unknown
- C.41 Process for activating catheterization team?
- After communicating with the emergency department, interventional cardiologist activates catheterization laboratory by calling staff or a central page operator
  - Emergency department makes at least two calls: one to the interventional cardiologist and another to a central page operator, who pages catheterization laboratory staff
  - Emergency department makes a single call to a central page operator, who then pages interventional cardiologist and catheterization laboratory staff
  - No standard approach
  - Other
  - Unknown
- C.42 Activation of on-call staff for catheterization laboratory?
- Page operator is not used
  - Page operator is used; confirmation of page receipt is required
  - Page operator is used; no confirmation of page receipt is required
  - No standard approach
  - Unknown
- C.43 First physician notified after STEMI diagnosis in emergency department?
- Cardiologist       Interventional cardiologist       Patient's primary care physician
  - Other or variable       Unknown
- C.44 Laboratory and radiographic results are needed to activate catheterization laboratory?
- Yes       No       No standard approach       Unknown

- 1  
2  
3  
4  
5  
6  
7  
8  
9  
10  
11  
12  
13  
14  
15  
16  
17  
18  
19  
20  
21  
22  
23  
24  
25  
26  
27  
28  
29  
30  
31  
32  
33  
34  
35  
36  
37  
38  
39  
40  
41  
42  
43  
44  
45  
46  
47  
48  
49  
50  
51  
52  
53  
54  
55  
56  
57  
58  
59  
60
- C.45 Process after emergency medical service transmits ECG results?
- Emergency department waits for patient to arrive at hospital to determine whether catheterization laboratory should be activated
  - Emergency department contacts cardiologist while the patient is en route to determine whether catheterization laboratory should be activated
  - Emergency department activates catheterization laboratory while the patient is still en route to the hospital
  - No standard approach or variable approach
  - Not applicable because ECG data not transmitted en route
  - Not applicable because ECG never performed en route
  - Unknown
- C.46 Expected interval between page and arrival of staff in catheterization laboratory?
- $\leq 20$  min
  - 21–30 min
  - $> 30$  min
  - No expected time
  - Unknown
- C.47 Expected interval between page and arrival of interventional cardiologist?
- $\leq 20$  min
  - 21–30 min
  - $> 30$  min
  - No expected time
  - Unknown
- C.48 Someone is always available to transport patients from emergency department to catheterization laboratory?
- No
  - Yes
  - Unknown
- C.49 Initiation of patient transport from emergency department to catheterization laboratory?
- After catheterization laboratory notifies emergency department it is ready
  - A set interval after the decision is made regarding PCI
  - No standard approach
  - Other approach
  - Unknown

- 1  
2  
3  
4  
5  
6  
7  
8  
9  
10  
11  
12  
13  
14  
15  
16  
17  
18  
19  
20  
21  
22  
23  
24  
25  
26  
27  
28  
29  
30  
31  
32  
33  
34  
35  
36  
37  
38  
39  
40  
41  
42  
43  
44  
45  
46  
47  
48  
49  
50  
51  
52  
53  
54  
55  
56  
57  
58  
59  
60
- C.50 Minimum number of nurses and technicians required in catheterization laboratory before patient is transported from emergency department?
- Interventional cardiologist must be present
  - Interventional cardiologist may not be present but need presence of 1 staff person
  - Interventional cardiologist may not be present but need presence of 2-4 staff person
  - No set number
  - Unknown
- C.51 Elective catheterization cases rescheduled for emergency PCI?
- Yes
  - No
  - It depends
  - Unknown
- C.52 If interventionalist is present, number of staff required to begin PCI?
- 1
  - 2
  - 3
  - 4
  - Unknown
- C.53 Catheterization laboratory is left so that next PCI can begin promptly?
- Yes
  - No
  - No standard policy
  - Unknown
- C.54 Cardiology fellows participate in performing PCI?
- No
  - Yes
  - Unknown
- C.55 Staff in critical care area are routinely cross-trained to cover catheterization laboratory?
- No
  - Yes
  - Unknown
- C.56 Location of catheterization laboratory?
- Elevator required to travel from emergency department
  - Same floor as emergency department
- C.57 An attending cardiologist is always at the hospital?
- No
  - Yes
  - Unknown



1  
2  
3  
4 C.58 Informed Consent before primary PCI?

- 5  
6  Not necessary
- 7  
8  Only orally obtained informed consent is needed
- 9  
10  One written informed consent form is needed
- 11  
12  More than one written informed consent form is needed
- 13  
14  Unknown

15  
16 C.59 Prepayment before primary PCI?

- 17  
18  No
- 19  
20  Yes, please specify the average amount approximately \_\_\_ (“-1” if unknown)
- 21  
22  Unknown

23  
24  
25 C.60 Does your hospital measure the following time intervals? *[Check all that apply]*

- 26  Door to ECG
- 27  
28  Door to needle
- 29  
30  Door to balloon
- 31  
32  None above
- 33  
34  Unknown

35  
36  
37 C.61 Do your hospital feedback the time intervals to someone? *[Check all that apply]*

- 38  No
- 39  
40  Yes, to physician staff involved in the care
- 41  
42  Yes, to nursing staff involved in the care
- 43  
44  Yes, to pharmacy staff involved in the care
- 45  
46  Yes, to other staff involved in the care
- 47  
48  Unknown
- 49  
50  
51  
52  
53  
54  
55  
56  
57  
58  
59  
60

1  
2  
3  
4 C.62 Do your hospital report the analyze results about the time intervals regularly? *[Check all that apply]*

- 5  
6  No
- 7  
8  Yes, to departments involved in the care (the emergency department, the cardiology department)
- 9  
10  Yes, to other department in your hospital
- 11  
12  Yes, to other institutions outside your hospital
- 13  
14  Unknown

15  
16  
17 **D. Organizational learning characteristics**

18  
19 **Instructions:** This section focuses on the organizational learning and measurements to improve  
20 AMI care, including supportive environment and leadership, experimentation and training,  
21 knowledge acquisition, reflection and performance monitoring, etc. Please draw on your own  
22 experiences in your current role working with clinical staff and administration. For all questions,  
23 please reflect upon them during the 1-year period from 1/1/2011 to 12/31/2011.

24 Although some questions in this section look similar, there are differences between them and you  
25 should treat each one as a separate question. The best approach is to answer each question fairly  
26 quickly. That is, don't try to count up the number of times you felt a particular way, but rather  
27 indicate the alternative that seems most reasonable.

28 The definition of "workgroup" below is the department, unit, ward, or group caring AMI  
29 patients that you are working at.

30 This section adopts 7-point (from highly inaccurate to highly accurate). If you think the options  
31 are difficult to understand or distinguish, please grade the accuracy here using actual numbers,  
32 while 1 is the lowest (highly inaccurate), 7 is the highest (highly accurate), then choose the  
33 corresponding option.  
34

35  
36 D.1 In this workgroup, people value new ideas.

- 37  
38  highly inaccurate  inaccurate  somewhat inaccurate  not sure  somewhat accurate  accurate
- 39  
40 highly accurate

41  
42 D.2 Clinicians are encouraged to creatively solve problems related to AMI care processes. (60)

- 43  
44  Never  Rarely  Sometimes  Usually  Always

45  
46 D.3 Innovative ideas about AMI care are shared widely in the hospital. (61)

- 47  
48  Never  Rarely  Sometimes  Usually  Always

49  
50 D.4 Differences in opinions are welcomed in this workgroup.

- 51  
52  highly inaccurate  inaccurate  somewhat inaccurate  not sure  somewhat accurate  accurate
- 53  
54 highly accurate
- 55  
56  
57  
58  
59  
60

- 1  
2  
3  
4  
5  
6  
7  
8  
9  
10  
11  
12  
13  
14  
15  
16  
17  
18  
19  
20  
21  
22  
23  
24  
25  
26  
27  
28  
29  
30  
31  
32  
33  
34  
35  
36  
37  
38  
39  
40  
41  
42  
43  
44  
45  
46  
47  
48  
49  
50  
51  
52  
53  
54  
55  
56  
57  
58  
59  
60
- D.5 In this workgroup, people are open to alternative ways of getting work done.  
 highly inaccurate  inaccurate  somewhat inaccurate  not sure  somewhat accurate  accurate  highly accurate
- D.6 People in this workgroup are eager to share information about what doesn't work as well as to share information about what does work.  
 highly inaccurate  inaccurate  somewhat inaccurate  not sure  somewhat accurate  accurate  highly accurate
- D.7 This workgroup frequently compares its performance to: Best-in-class organizations.  
 highly inaccurate  inaccurate  somewhat inaccurate  not sure  somewhat accurate  accurate  highly accurate
- D.8 This workgroup frequently compares its performance to: Other similar workgroups.  
 highly inaccurate  inaccurate  somewhat inaccurate  not sure  somewhat accurate  accurate  highly accurate
- D.9 This workgroup consistently collects information on technological trends.  
 highly inaccurate  inaccurate  somewhat inaccurate  not sure  somewhat accurate  accurate  highly accurate
- D.10 If you make a mistake in this workgroup, it is often held against you. (Among clinicians taking care of patients with AMI, there is a tendency to blame individuals for errors in patient care). (66)  
 Never  Rarely  Sometimes  Usually  Always
- D.11 Clinicians caring for patients with AMI are easily able to address problems and tough issues with their department heads/chiefs. (56)  
 Never  Rarely  Sometimes  Usually  Always
- D.12 Department heads/chiefs are easily able to address problems and tough issues with senior level administration.(57)  
 Never  Rarely  Sometimes  Usually  Always
- D.13 Nurses are comfortable checking with physicians if they have concerns about patient care.(65)  
 Never  Rarely  Sometimes  Usually  Always

- 1  
2  
3  
4  
5  
6  
7  
8  
9  
10  
11  
12  
13  
14  
15  
16  
17  
18  
19  
20  
21  
22  
23  
24  
25  
26  
27  
28  
29  
30  
31  
32  
33  
34  
35  
36  
37  
38  
39  
40  
41  
42  
43  
44  
45  
46  
47  
48  
49  
50  
51  
52  
53  
54  
55  
56  
57  
58  
59  
60
- D.14 Clinicians involved in the care of patients with AMI value each others' skills and talents (e.g., physicians value nurses' skills and talents and vice-versa).(58)
- Never  Rarely  Sometimes  Usually  Always
- D.15 Clinicians involved in the care of patients with AMI avoid sharing responsibility for medical errors.  Never  Rarely  Sometimes  Usually  Always. (59)
- Never  Rarely  Sometimes  Usually  Always
- D.16 Were physicians explicitly encouraged to disclose medical errors to patients or their family members? (7)
- Never  Rarely  Sometimes  Usually  Always
- D.17 This workgroup engages in productive conflict and debate during discussions.
- highly inaccurate  inaccurate  somewhat inaccurate  not sure  somewhat accurate  accurate  highly accurate
- D.18 In this workgroup, we frequently identify and discuss underlying assumptions that might affect key decisions.
- highly inaccurate  inaccurate  somewhat inaccurate  not sure  somewhat accurate  accurate  highly accurate
- D.19 The hospital has the resources and information it needs to reduce 30-day mortality rates in patients with AMI. (51)
- Never  Rarely  Sometimes  Usually  Always
- D.20 Senior-level administration is supportive of efforts to improve AMI care. (52)
- Never  Rarely  Sometimes  Usually  Always
- D.21 There is simply no time for reflection in this workgroup.
- highly inaccurate  inaccurate  somewhat inaccurate  not sure  somewhat accurate  accurate  highly accurate
- D.22 In this workgroup, people are too busy to invest time in improvement.
- highly inaccurate  inaccurate  somewhat inaccurate  not sure  somewhat accurate  accurate  highly accurate

- 1  
2  
3  
4 D.23 My manager(s) establish(es) forums for and provide(s) time and resources for identifying problems  
5 and organizational challenges.  
6  
7  
8  highly inaccurate  inaccurate  somewhat inaccurate  not sure  somewhat accurate  accurate   
9 highly accurate  
10  
11  
12 D.24 My manager(s) establish(es) forums for and provide(s) time and resources for reflecting and improving  
13 on past performance.  
14  
15  
16  highly inaccurate  inaccurate  somewhat inaccurate  not sure  somewhat accurate  accurate   
17 highly accurate  
18  
19  
20 D.25 My manager(s) listen(s) attentively.  
21  
22  
23  highly inaccurate  inaccurate  somewhat inaccurate  not sure  somewhat accurate  accurate   
24 highly accurate  
25  
26  
27 D.26 My manager(s) invite(s) input from others in discussions.  
28  
29  
30  highly inaccurate  inaccurate  somewhat inaccurate  not sure  somewhat accurate  accurate   
31 highly accurate  
32  
33  
34 D.27 This workgroup experiments frequently with new product/service offerings.  
35  
36  
37  highly inaccurate  inaccurate  somewhat inaccurate  not sure  somewhat accurate  accurate   
38 highly accurate  
39  
40  
41 D.28 This workgroup experiments frequently with new ways of working.  
42  
43  
44  highly inaccurate  inaccurate  somewhat inaccurate  not sure  somewhat accurate  accurate   
45 highly accurate  
46  
47  
48 D.29 This workgroup frequently employs pilot projects or simulations when trying our new ideas.  
49  
50  
51  highly inaccurate  inaccurate  somewhat inaccurate  not sure  somewhat accurate  accurate   
52 highly accurate  
53  
54  
55 D.30 This workgroup has a formal process for conducting and evaluating experiments or new ideas.  
56  
57  
58  highly inaccurate  inaccurate  somewhat inaccurate  not sure  somewhat accurate  accurate   
59 highly accurate  
60

- 1  
2  
3  
4  
5  
6  
7  
8  
9  
10  
11  
12  
13  
14  
15  
16  
17  
18  
19  
20  
21  
22  
23  
24  
25  
26  
27  
28  
29  
30  
31  
32  
33  
34  
35  
36  
37  
38  
39  
40  
41  
42  
43  
44  
45  
46  
47  
48  
49  
50  
51  
52  
53  
54  
55  
56  
57  
58  
59  
60
- D.31 Experienced employees in this workgroup receive training when new initiatives are launched.
- highly inaccurate  inaccurate  somewhat inaccurate  not sure  somewhat accurate  accurate  highly accurate
- D.32 Experienced employees in this workgroup receive training when shifting to a new position.
- highly inaccurate  inaccurate  somewhat inaccurate  not sure  somewhat accurate  accurate  highly accurate
- D.33 Newly hired employees in this workgroup receive adequate training.
- highly inaccurate  inaccurate  somewhat inaccurate  not sure  somewhat accurate  accurate  highly accurate
- D.34 Did your hospital provide training to EMS providers about AMI care? (17)
- Yes, about monthly
- Yes, about quarterly
- Yes, about annually
- Yes, other: \_\_\_\_\_
- No
- Unknown
- D.35 This workgroup has forums for meeting with and learning from: Experts from outside the organization.
- highly inaccurate  inaccurate  somewhat inaccurate  not sure  somewhat accurate  accurate  highly accurate
- D.36 This workgroup has forums for meeting with and learning from: Experts from other departments/teams/divisions.
- highly inaccurate  inaccurate  somewhat inaccurate  not sure  somewhat accurate  accurate  highly accurate
- D.37 This workgroup has forums for meeting with and learning from: Customers/clients.
- highly inaccurate  inaccurate  somewhat inaccurate  not sure  somewhat accurate  accurate  highly accurate

- 1  
2  
3  
4  
5  
6  
7  
8  
9  
10  
11  
12  
13  
14  
15  
16  
17  
18  
19  
20  
21  
22  
23  
24  
25  
26  
27  
28  
29  
30  
31  
32  
33  
34  
35  
36  
37  
38  
39  
40  
41  
42  
43  
44  
45  
46  
47  
48  
49  
50  
51  
52  
53  
54  
55  
56  
57  
58  
59  
60
- D.38 This workgroup regularly conducts post-audits, after-action reviews, and debriefings.
- highly inaccurate
  - inaccurate
  - somewhat inaccurate
  - not sure
  - somewhat accurate
  - accurate
  - highly accurate
- D.39 Did your hospital have regular ‘morbidity and mortality’ conferences (or another educational session) for discussing individual cases involving patients with AMI? (5)
- Never
  - Rarely
  - Sometimes
  - Usually
  - Always
- D.40 Did your hospital review the deaths of patients with AMI? (4a)
- No, we did not review these cases (**go to D44**)
  - Yes, we reviewed *only* deaths with potential quality issues (i.e., unexpected deaths)
  - Yes, we reviewed *all* deaths
  - Other, please specify: \_\_\_\_\_
  - Unknown
- D.41 Did your hospital have a **designated person or group** to review the deaths of patients with AMI (i.e., on an individual case level) that occurred during hospitalization? (4)
- Never
  - Rarely
  - Sometimes
  - Usually
  - Always
- D.42 How long after the occurrence of the death were the cases typically reviewed? (4b)
- Within one week of the death
  - Within one month of the death
  - Within 3 months of the death
  - Other, please specify: \_\_\_\_\_
  - We did not have a set timeframe for reviewing these cases
  - Unknown

- 1  
2  
3  
4 D.43 Who usually reviewed these cases? (4c)  
5  
6 a. Senior management of the hospital  
7  
8  Never  Rarely  Sometimes  Usually  Always  
9  
10 b. Cardiology chiefs  
11  
12  Never  Rarely  Sometimes  Usually  Always  
13  
14 c. Nursing directors  
15  
16  Never  Rarely  Sometimes  Usually  Always  
17  
18 d. Other physicians participating in the care of patients with AMI  
19  
20  Never  Rarely  Sometimes  Usually  Always  
21  
22 e. Quality Improvement/Quality Management department staff  
23  
24  Never  Rarely  Sometimes  Usually  Always  
25  
26 D.44 Did your hospital have a **designated person or group** to review any of the following **adverse events**  
27  
28 in patients with AMI (i.e., on an individual case level)? (6)  
29  
30 a. Sentinel events (unexpected occurrence involving death or serious physical or psychological injury)  
31  
32 that occurred during hospitalization  
33  
34  Never  Rarely  Sometimes  Usually  Always  
35  
36 b. Unexpected transfers from a floor (non-monitored unit) to an intensive care unit  
37  
38  Never  Rarely  Sometimes  Usually  Always  
39  
40 c. Catastrophic complications that occurred immediately after discharge from the hospital  
41  
42  Never  Rarely  Sometimes  Usually  Always  
43  
44 D.45 How long after the occurrence of these adverse events were the cases typically reviewed? (6a)  
45  
46  Within one week of the adverse event  
47  
48  Within one month of the adverse event  
49  
50  Within 3 months of the adverse event  
51  
52  Other, please specify: \_\_\_\_\_  
53  
54  We did not have a set timeframe for reviewing these cases  
55  
56  Unknown  
57  
58  
59  
60



1  
2  
3  
4 D.46 Who usually reviewed these cases? (6b)

5  
6 a. Senior management of the hospital

7  
8  Never  Rarely  Sometimes  Usually  Always

9  
10 b. Cardiology chiefs

11  
12  Never  Rarely  Sometimes  Usually  Always

13  
14 c. Nursing directors

15  
16  Never  Rarely  Sometimes  Usually  Always

17  
18 d. Other physicians participating in the care of patients with AMI

19  
20  Never  Rarely  Sometimes  Usually  Always

21  
22 e. Quality Improvement/Quality Management department staff

23  
24  Never  Rarely  Sometimes  Usually  Always

25  
26 f. Other, please specify: \_\_\_\_

27  
28 D.47 Did your hospital use root cause analysis or a similar method to understand the following problems in  
29  
30 AMI care?

31  
32 a. Poor adherence to the core medication (i.e., anti-platelet agents) measures

33  
34  Never  Rarely  Sometimes  Usually  Always

35  
36 b. Delay to fibrinolytic therapy or percutaneous coronary intervention (PCI)

37  
38  Never  Rarely  Sometimes  Usually  Always

39  
40 D.48 Did your hospital review data on **30-day mortality rates** (deaths occurring within 30 days of  
41  
42 admission, including both inpatient and post-discharge deaths) in patients admitted with AMI (Check  
43  
44 all that apply) (10)

45  
46  Yes, through the medical insurance data system

47  
48  Yes, through a regional database system

49  
50  Yes, we internally collect our own data on deaths

51  
52  Yes, other, please specify: \_\_\_\_

53  
54  No [**Skip to D52**]

55  
56  Unknown

- 1  
2  
3  
4  
5  
6  
7  
8  
9  
10  
11  
12  
13  
14  
15  
16  
17  
18  
19  
20  
21  
22  
23  
24  
25  
26  
27  
28  
29  
30  
31  
32  
33  
34  
35  
36  
37  
38  
39  
40  
41  
42  
43  
44  
45  
46  
47  
48  
49  
50  
51  
52  
53  
54  
55  
56  
57  
58  
59  
60
- D.49 How quickly were **mortality rates** in patients with AMI available to your hospital (i.e., what was the most current data available to your hospital)? (10a)
- Within 6 months of care delivery
  - 6 months to 1 year after care delivery
  - 1 - 2 years after care delivery
  - Less frequently than 2 years of care delivery
  - Unknown
- D.50 Did your hospital regularly compare its performance to other hospitals on either **inpatient** in patients with AMI? (14)
- Never  Rarely  Sometimes  Usually  Always
- D.51 Did your hospital have **efforts** to improve any of the following inpatient acute myocardial infarction (AMI) quality measures? (1)
- a. Adherence to the core medication (i.e., anti-platelet agents) measures
- Never  Rarely  Sometimes  Usually  Always
- b. Time to fibrinolytic therapy or percutaneous coronary intervention (PCI)
- Never  Rarely  Sometimes  Usually  Always
- D.52 Beyond these quality measures, did your hospital initiate **efforts** to improve any of the following in patients admitted with AMI? (2)
- a. Inpatient mortality in patients with AMI
- Never  Rarely  Sometimes  Usually  Always
- b. **Post-discharge** mortality (death occurring after discharge, but within 30 days of admission) in patients with AMI
- Never  Rarely  Sometimes  Usually  Always
- c. Readmission within 30 days from prior admission in patients with AMI
- Never  Rarely  Sometimes  Usually  Always

1  
2  
3  
4 D.53 Did your hospital have a quality improvement **team(s)** devoted to improving: (3)

5  
6 a. Inpatient mortality in patients with AMI

7  
8  Never  Rarely  Sometimes  Usually  Always

9  
10 b. Post-discharge mortality (death occurring after discharge, but within 30 days of admission) in  
11 patients with AMI

12  
13  Never  Rarely  Sometimes  Usually  Always

14  
15  
16 D.54 3a. Please indicate members of either the inpatient or post-discharge mortality **team(s)**.

17  
18 a. Senior management of the hospital

19  
20  Never  Rarely  Sometimes  Usually  Always

21  
22 b. Hospital governing board

23  
24  Never  Rarely  Sometimes  Usually  Always

25  
26 c. Chief of cardiology

27  
28  Never  Rarely  Sometimes  Usually  Always

29  
30 d. Nursing directors

31  
32  Never  Rarely  Sometimes  Usually  Always

33  
34 e. Other physicians participating in the care of patients with AMI

35  
36  Never  Rarely  Sometimes  Usually  Always

37  
38 f. Quality Improvement/Quality Management department staff

39  
40  Never  Rarely  Sometimes  Usually  Always

41  
42 g. Other please specify: \_\_\_\_\_

43  
44  
45 D.55 Nurses are engaged in efforts to improve AMI care. (53)

46  
47  Never  Rarely  Sometimes  Usually  Always

48  
49 D.56 Cardiologists are engaged in efforts to improve AMI care. (54)

50  
51  Never  Rarely  Sometimes  Usually  Always

52  
53 D.57 Emergency medicine physicians are engaged in efforts to improve AMI care. (55)

54  
55  Never  Rarely  Sometimes  Usually  Always

- 1  
2  
3  
4  
5  
6  
7  
8  
9  
10  
11  
12  
13  
14  
15  
16  
17  
18  
19  
20  
21  
22  
23  
24  
25  
26  
27  
28  
29  
30  
31  
32  
33  
34  
35  
36  
37  
38  
39  
40  
41  
42  
43  
44  
45  
46  
47  
48  
49  
50  
51  
52  
53  
54  
55  
56  
57  
58  
59  
60
- D.58 Did your hospital have one or more physician champions focused on improving either **inpatient** or **30-day mortality** in patients with AMI? (12)
- Never  Rarely  Sometimes  Usually  Always
- D.59 Did your hospital have one or more nurse champions focused on improving either **inpatient** or **30-day mortality** in patients with AMI? (13)
- Never  Rarely  Sometimes  Usually  Always
- D.60 After we make changes to improve AMI care, we fail to evaluate their effectiveness. (67)
- Never  Rarely  Sometimes  Usually  Always
- D.61 Did cardiology and emergency department staff meet together to review care for patients with AMI? (15)
- Yes, about monthly
- Yes, about quarterly
- Yes, about annually
- Yes, other: \_\_\_\_\_
- No [**Skip to D63**]
- Unknown
- D.62 What was typically discussed at these meetings? (15a).
- a. Care of patients with ST-elevation myocardial infarction (STEMI)
- Never  Rarely  Sometimes  Usually  Always
- b. Care of patients with Unstable Angina/**non**-STEMI (NSTEMI)
- Never  Rarely  Sometimes  Usually  Always
- c. Care of patients with chest pain, in general
- Never  Rarely  Sometimes  Usually  Always

- 1  
2  
3  
4  
5  
6  
7  
8  
9  
10  
11  
12  
13  
14  
15  
16  
17  
18  
19  
20  
21  
22  
23  
24  
25  
26  
27  
28  
29  
30  
31  
32  
33  
34  
35  
36  
37  
38  
39  
40  
41  
42  
43  
44  
45  
46  
47  
48  
49  
50  
51  
52  
53  
54  
55  
56  
57  
58  
59  
60
- D.63 Did clinicians from your hospital meet with emergency medical system (EMS) providers to review the care of patients with AMI? (16)
- Yes, about monthly
  - Yes, about quarterly
  - Yes, about annually
  - Yes, other: \_\_\_\_\_
  - No
  - Unknown
- D.64 There is good coordination among the different departments involved with the care of patients with AMI. (62)
- Never  Rarely  Sometimes  Usually  Always
- D.65 Departments caring for patients with AMI (e.g., cardiology, emergency medicine) communicate easily with each other.(64)
- Never  Rarely  Sometimes  Usually  Always
- D.66 Clinicians caring for patients with AMI share new evidence-based approaches with the AMI team.(63)
- Never  Rarely  Sometimes  Usually  Always
- D.67 Which best describes the quality of your interaction with hospitals **that referred patients to you with AMI?**(18)
- Very collaborative (we shared data along with strategies for improving AMI care)  Somewhat collaborative (we communicated regularly, but we did not share data and strategies)
  - Not collaborative (we had no or minimal contact with the referring hospital/s)
  - Not applicable [**Skip to D69**]

1  
2  
3  
4 D.68 Did your hospital routinely give feedback to the referring hospital/s on any of the following?

5 (18a.)

6 a. Time to transfer

7  Never  Rarely  Sometimes  Usually  Always

8 b. AMI-related procedures performed

9  Never  Rarely  Sometimes  Usually  Always

10 c. Patient outcome

11  Never  Rarely  Sometimes  Usually  Always

12 d. Other please specify: \_\_\_\_\_

13  
14  
15  
16  
17  
18  
19  
20  
21  
22 D.69 Which best describes the quality of your interaction with hospitals **that you referred patients to with**  
23 **AMI?** (19)

24  Very collaborative (we shared data along with strategies for improving AMI care)  Somewhat  
25 collaborative (we communicated regularly, but we did not share data and strategies)

26  Not collaborative (we had no or minimal contact with hospitals in our region)

27  Not applicable

28  
29  
30  
31  
32  
33  
34  
35 D.70 Was your hospital part of a regional effort or consortium of hospitals to improve AMI care? (20)

36  Never  Rarely  Sometimes  Usually  Always

### C. Definition of In-hospital Complications

#### 1) Re-infarction

Indicate if there is physician documentation of recurrent myocardial infarction during hospitalization.

#### 2) Cardiogenic shock

Indicate if there is physician documentation of cardiogenic shock during hospitalization.

#### 3) Ischemic stroke

Indicate if there are physician documentations of new-onset ischemia stroke and stroke-related symptoms during hospitalization. The stroke-related symptoms include: trouble walking/loss of balance/incoordination, one-sided numbness or hemi-anesthesia, one-sided facial numbness or hemi-anesthesia, mouth askew and drooling, dysarthria or slurred speech, loss of vision or blurred vision in one or both eyes, dizziness with vomiting, severe headache and vomiting, unconsciousness, and hyperspasmia.

#### 4) Congestive heart failure

Indicate if there is physician documentation of heart failure during hospital stay. This include those without a history of heart failure but develop heart failure during hospitalization, and those with a history of heart failure as a chronic comorbidity and develop worsening heart failure during hospitalization.

**D. Correlations between positive response rate of LOS-27 and IV magnesium sulfate**

**use**

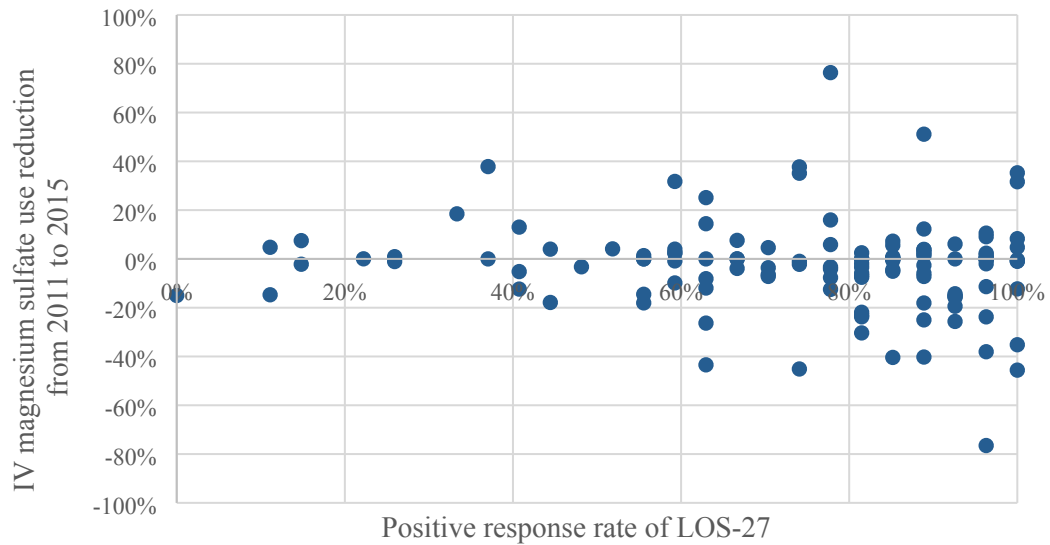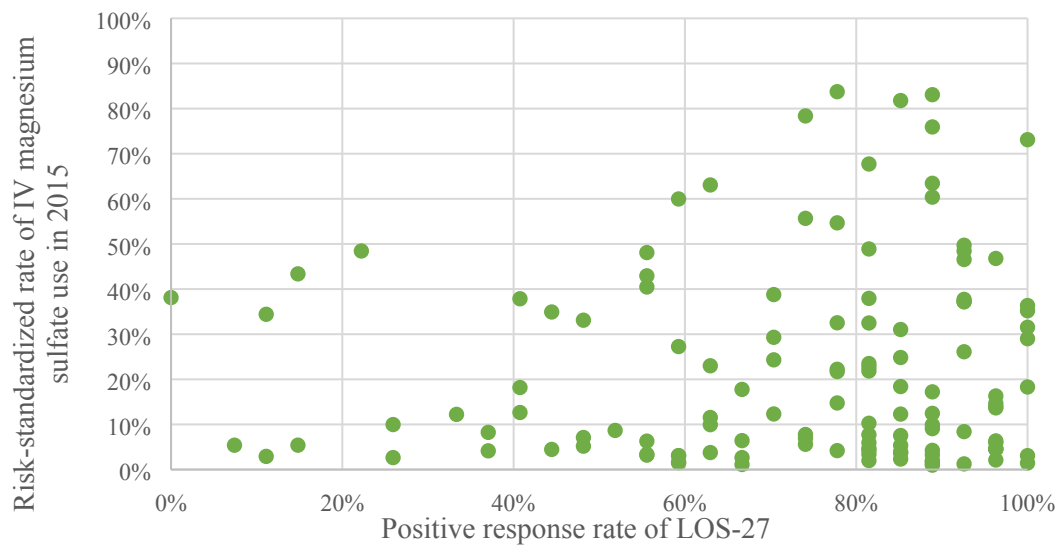



**E. Comparisons between patients with and without IV magnesium sulfate therapy after propensity score matching**

| Characteristics                   | Use N(%)   | Non-Use(%) | P value |
|-----------------------------------|------------|------------|---------|
| <b>Patient characteristics</b>    |            |            |         |
| Age                               |            |            |         |
| 55-64                             | 1072(24.4) | 1037(23.6) | .794    |
| 65-74                             | 1290(29.4) | 1283(29.2) |         |
| <55                               | 938(21.3)  | 959(21.8)  |         |
| >=75                              | 1094(24.9) | 1115(25.4) |         |
| Gender                            |            |            |         |
| Female                            | 1346(30.6) | 1299(29.6) | .274    |
| Male                              | 3048(69.4) | 3095(70.4) |         |
| Hypertension                      | 2247(51.1) | 2196(50)   | .277    |
| Diabetes                          | 889(20.2)  | 878(20)    | .77     |
| Dyslipidemia                      | 235(5.3)   | 244(5.6)   | .672    |
| Currently smoking                 | 1496(34)   | 1470(33.5) | .558    |
| Number of risk factors            |            |            |         |
| 1                                 | 2055(46.8) | 1997(45.4) | .445    |
| 2                                 | 1049(23.9) | 1047(23.8) |         |
| >=3                               | 232(5.3)   | 229(5.2)   |         |
| None                              | 1058(24.1) | 1121(25.5) |         |
| Prior ischemic stroke             | 546(12.4)  | 484(11)    | .04     |
| Prior myocardial infarction       | 416(9.5)   | 382(8.7)   | .207    |
| Prior CABG/PCI                    | 104(2.4)   | 107(2.4)   | .834    |
| Chest discomfort                  | 4021(91.5) | 4046(92.1) | .331    |
| Left branch block at presentation | 65(1.5)    | 44(1)      | .043    |
| Cardiac arrest at presentation    | 81(1.8)    | 79(1.8)    | .873    |
| Cardiogenic shock at presentation | 279(6.3)   | 236(5.4)   | .051    |
| Acute stroke at presentation      | 77(1.8)    | 66(1.5)    | .354    |

|                                 |            |            |      |
|---------------------------------|------------|------------|------|
| Heart rate at presentation, bpm |            |            | .733 |
| <50                             | 177(4)     | 183(4.2)   |      |
| 50-110                          | 3886(88.4) | 3898(88.7) |      |
| >110                            | 331(7.5)   | 313(7.1)   |      |
| SBP at presentation, mmHg       |            |            | .621 |
| <120                            | 1565(35.6) | 1607(36.6) |      |
| 120-139                         | 1299(29.6) | 1307(29.7) |      |
| 140-159                         | 913(20.8)  | 899(20.5)  |      |
| >=160                           | 617(14)    | 581(13.2)  |      |
| Reperfusion therapies           |            |            | .941 |
| No reperfusion                  | 3130(71.2) | 3131(71.3) |      |
| Fibrinolytic therapy            | 746(17)    | 754(17.2)  |      |
| Primary PCI                     | 518(11.8)  | 509(11.6)  |      |
| <b>Hospital characteristics</b> |            |            |      |
| Teaching hospital               | 3462(78.8) | 3530(80.3) | .072 |
| Hospital level                  |            |            | .451 |
| Secondary or lower              | 1576(35.9) | 1610(36.6) |      |
| Tertiary                        | 2818(64.1) | 2784(63.4) |      |
| Economic geographic region      |            |            |      |
| Central                         | 1115(25.4) | 1186(27)   | .191 |
| Eastern                         | 2360(53.7) | 2288(52.1) |      |
| Western                         | 919(20.9)  | 920(20.9)  |      |
| Urban/Rural                     |            |            |      |
| Rural                           | 1724(39.2) | 1721(39.2) | .948 |
| Urban                           | 2670(60.8) | 2673(60.8) |      |

1  
2  
3  
4  
5  
6  
7  
8  
9  
10  
11  
12  
13  
14  
15  
16  
17  
18  
19  
20  
21  
22  
23  
24  
25  
26  
27  
28  
29  
30  
31  
32  
33  
34  
35  
36  
37  
38  
39  
40  
41  
42  
43  
44  
45  
46  
47  
48  
49  
50  
51  
52  
53  
54  
55  
56  
57  
58  
59  
60STROBE Statement—Checklist of items that should be included in reports of *case-control studies*

|                              | Item No | Recommendation                                                                                                                                                                                    | Page No |
|------------------------------|---------|---------------------------------------------------------------------------------------------------------------------------------------------------------------------------------------------------|---------|
| <b>Title and abstract</b>    | 1       | (a) Indicate the study's design with a commonly used term in the title or the abstract                                                                                                            | 3       |
|                              |         | (b) Provide in the abstract an informative and balanced summary of what was done and what was found                                                                                               | 3       |
| <b>Introduction</b>          |         |                                                                                                                                                                                                   |         |
| Background/rationale         | 2       | Explain the scientific background and rationale for the investigation being reported                                                                                                              | 5       |
| Objectives                   | 3       | State specific objectives, including any prespecified hypotheses                                                                                                                                  | 5       |
| <b>Methods</b>               |         |                                                                                                                                                                                                   |         |
| Study design                 | 4       | Present key elements of study design early in the paper                                                                                                                                           | 6       |
| Setting                      | 5       | Describe the setting, locations, and relevant dates, including periods of recruitment, exposure, follow-up, and data collection                                                                   | 6, 7    |
| Participants                 | 6       | (a) Give the eligibility criteria, and the sources and methods of case ascertainment and control selection. Give the rationale for the choice of cases and controls                               | 7       |
|                              |         | (b) For matched studies, give matching criteria and the number of controls per case                                                                                                               |         |
| Variables                    | 7       | Clearly define all outcomes, exposures, predictors, potential confounders, and effect modifiers. Give diagnostic criteria, if applicable                                                          | 7       |
| Data sources/<br>measurement | 8*      | For each variable of interest, give sources of data and details of methods of assessment (measurement). Describe comparability of assessment methods if there is more than one group              | 7       |
| Bias                         | 9       | Describe any efforts to address potential sources of bias                                                                                                                                         | 9       |
| Study size                   | 10      | Explain how the study size was arrived at                                                                                                                                                         | 6       |
| Quantitative variables       | 11      | Explain how quantitative variables were handled in the analyses. If applicable, describe which groupings were chosen and why                                                                      | 8, 9    |
| Statistical methods          | 12      | (a) Describe all statistical methods, including those used to control for confounding                                                                                                             | 8       |
|                              |         | (b) Describe any methods used to examine subgroups and interactions                                                                                                                               | 8       |
|                              |         | (c) Explain how missing data were addressed                                                                                                                                                       |         |
|                              |         | (d) If applicable, explain how matching of cases and controls was addressed                                                                                                                       | 9       |
|                              |         | (e) Describe any sensitivity analyses                                                                                                                                                             |         |
| <b>Results</b>               |         |                                                                                                                                                                                                   |         |
| Participants                 | 13*     | (a) Report numbers of individuals at each stage of study—eg numbers potentially eligible, examined for eligibility, confirmed eligible, included in the study, completing follow-up, and analysed | 10      |
|                              |         | (b) Give reasons for non-participation at each stage                                                                                                                                              | 23      |
|                              |         | (c) Consider use of a flow diagram                                                                                                                                                                | 23      |
| Descriptive data             | 14*     | (a) Give characteristics of study participants (eg demographic, clinical, social) and information on exposures and potential confounders                                                          | 21, 22  |
|                              |         | (b) Indicate number of participants with missing data for each variable of interest                                                                                                               |         |
| Outcome data                 | 15*     | Report numbers in each exposure category, or summary measures of exposure                                                                                                                         | 11, 25  |

|    |                          |    |                                                                                                                                                                                                              |
|----|--------------------------|----|--------------------------------------------------------------------------------------------------------------------------------------------------------------------------------------------------------------|
| 1  |                          |    |                                                                                                                                                                                                              |
| 2  |                          |    |                                                                                                                                                                                                              |
| 3  | Main results             | 16 | (a) Give unadjusted estimates and, if applicable, confounder-adjusted estimates and their precision (eg, 95% confidence interval). Make clear which confounders were adjusted for and why they were included |
| 4  |                          |    | 25                                                                                                                                                                                                           |
| 5  |                          |    | 26                                                                                                                                                                                                           |
| 6  |                          |    |                                                                                                                                                                                                              |
| 7  |                          |    | (b) Report category boundaries when continuous variables were categorized                                                                                                                                    |
| 8  |                          |    | 21,                                                                                                                                                                                                          |
| 9  |                          |    | 22                                                                                                                                                                                                           |
| 10 |                          |    |                                                                                                                                                                                                              |
| 11 |                          |    | (c) If relevant, consider translating estimates of relative risk into absolute risk for a meaningful time period                                                                                             |
| 12 | Other analyses           | 17 | Report other analyses done—eg analyses of subgroups and interactions, and sensitivity analyses                                                                                                               |
| 13 |                          |    |                                                                                                                                                                                                              |
| 14 |                          |    |                                                                                                                                                                                                              |
| 15 |                          |    |                                                                                                                                                                                                              |
| 16 | <b>Discussion</b>        |    |                                                                                                                                                                                                              |
| 17 | Key results              | 18 | Summarise key results with reference to study objectives                                                                                                                                                     |
| 18 |                          |    | 12,13                                                                                                                                                                                                        |
| 19 | Limitations              | 19 | Discuss limitations of the study, taking into account sources of potential bias or imprecision. Discuss both direction and magnitude of any potential bias                                                   |
| 20 |                          |    | 14,15                                                                                                                                                                                                        |
| 21 | Interpretation           | 20 | Give a cautious overall interpretation of results considering objectives, limitations, multiplicity of analyses, results from similar studies, and other relevant evidence                                   |
| 22 |                          |    | 12,15                                                                                                                                                                                                        |
| 23 | Generalisability         | 21 | Discuss the generalisability (external validity) of the study results                                                                                                                                        |
| 24 |                          |    | 15                                                                                                                                                                                                           |
| 25 | <b>Other information</b> |    |                                                                                                                                                                                                              |
| 26 | Funding                  | 22 | Give the source of funding and the role of the funders for the present study and, if applicable, for the original study on which the present article is based                                                |
| 27 |                          |    | 16                                                                                                                                                                                                           |
| 28 |                          |    |                                                                                                                                                                                                              |

\*Give information separately for cases and controls.

**Note:** An Explanation and Elaboration article discusses each checklist item and gives methodological background and published examples of transparent reporting. The STROBE checklist is best used in conjunction with this article (freely available on the Web sites of PLoS Medicine at <http://www.plosmedicine.org/>, Annals of Internal Medicine at <http://www.annals.org/>, and Epidemiology at <http://www.epidem.com/>). Information on the STROBE Initiative is available at <http://www.strobe-statement.org>.

## Methods Paper

# The China Patient-Centered Evaluative Assessment of Cardiac Events (China PEACE) Retrospective Study of Acute Myocardial Infarction: Study Design

Kumar Dharmarajan, MD, MBA\*; Jing Li, MD, PhD\*; Xi Li, MD, PhD; Zhenqiu Lin, PhD; Harlan M. Krumholz, MD, SM†; Lixin Jiang, MD, PhD‡; for the China PEACE Collaborative Group

**Background**—Cardiovascular diseases are rising as a cause of death and disability in China. To improve outcomes for patients with these conditions, the Chinese government, academic researchers, clinicians, and >200 hospitals have created China Patient-Centered Evaluative Assessment of Cardiac Events (China PEACE), a national network for research and performance improvement. The first study from China PEACE, the Retrospective Study of Acute Myocardial Infarction (China PEACE-Retrospective AMI Study), is designed to promote improvements in acute myocardial infarction (AMI) quality of care by generating knowledge about the characteristics, treatments, and outcomes of patients hospitalized with AMI across a representative sample of Chinese hospitals during the past decade.

**Methods and Results**—The China PEACE-Retrospective AMI Study will examine >18000 patient records from 162 hospitals identified using a 2-stage cluster sampling design within economic–geographic regions. Records were chosen from 2001, 2006, and 2011 to identify temporal trends. Data quality will be monitored by a central coordinating center and will, in particular, address case ascertainment, data abstraction, and data management. Analyses will examine patient characteristics, diagnostic testing patterns, in-hospital treatments, in-hospital outcomes, and variation in results by time and site of care. In addition to publications, data will be shared with participating hospitals and the Chinese government to develop strategies to promote quality improvement.

**Conclusions**—The China PEACE-Retrospective AMI Study is the first to leverage the China PEACE platform to better understand AMI across representative sites of care and during the past decade in China. The China PEACE collaboration among government, academicians, clinicians, and hospitals is poised to translate research about trends and patterns of AMI practices and outcomes into improved care for patients.

**Clinical Trial Registration**—URL: <http://www.clinicaltrials.gov>. Unique identifier: NCT01624883.

(*Circ Cardiovasc Qual Outcomes*. 2013;6:732-740.)

**Key Words:** epidemiology ■ morbidity ■ mortality ■ myocardial infarction

Ischemic heart disease has significant public health importance in China.<sup>1,2</sup> Unlike in the United States,<sup>3,4</sup> age-standardized ischemic heart disease incidence is rising in China.<sup>5–10</sup> Reasons for this trend include the increasing prevalence of traditional risk factors for atherosclerosis,<sup>6,7,10–12</sup> including hypertension,<sup>6,7</sup> hyperlipidemia,<sup>7,13</sup> diabetes mellitus,<sup>7,13</sup> obesity,<sup>13–16</sup> and inadequate physical activity<sup>6,7</sup> in the

presence of significant exposure to cigarette smoke<sup>7,17,18</sup> and air pollution.<sup>19</sup> Population aging is further contributing to rising ischemic heart disease incidence.<sup>10</sup>

To improve outcomes for ischemic heart disease and other cardiovascular diseases in China, the China National Center for Cardiovascular Disease (NCCD), the Yale-New Haven Hospital Center for Outcomes Research and Evaluation, the Chinese

Received June 26, 2013; accepted September 17, 2013.

From The China PEACE Collaborative Group: State Key Laboratory of Cardiovascular Disease, China Oxford Centre for International Health Research, Fuwai Hospital, National Center for Cardiovascular Diseases, Chinese Academy of Medical Sciences and Peking Union Medical College, Beijing, People's Republic of China; and The Center for Outcomes Research and Evaluation, Yale-New Haven Hospital, New Haven, CT; Center for Outcomes Research and Evaluation, Yale-New Haven Hospital, New Haven, CT (K.D., Z.L., H.M.K.); Division of Cardiology, Columbia University Medical Center, New York, NY (K.D.); State Key Laboratory of Cardiovascular Disease, China Oxford Centre for International Health Research, Fuwai Hospital, National Center for Cardiovascular Diseases, Chinese Academy of Medical Sciences and Peking Union Medical College, Beijing, People's Republic of China (J.L., X.L., L.J.); Section of Cardiovascular Medicine and the Robert Wood Johnson Clinical Scholars Program, Department of Internal Medicine, Yale University School of Medicine, New Haven, CT (H.M.K.); and Department of Health Policy and Management, Yale School of Public Health, New Haven, CT (H.M.K.).

\*Dr Dharmarajan and Dr J. Li are joint first authors.

†Drs Krumholz and Jiang are joint senior authors.

This manuscript was handled independently by Kirsten Bibbins-Domingo, MD, PhD, MS, as a Guest Editor. The Editors had no role in the evaluation of the manuscript or in the decision about its acceptance.

The online-only Data Supplement is available at <http://circoutcomes.ahajournals.org/lookup/suppl/doi:10.1161/CIRCOUTCOMES.113.000441/-DC1>.

Correspondence to Lixin Jiang, State Key Laboratory of Cardiovascular Disease, China Oxford Center for International Health Research, Fuwai Hospital, National Center for Cardiovascular Diseases, Chinese Academy of Medical Sciences and Peking Union Medical College, 167 Beilishi Rd, Beijing 100037, People's Republic of China. E-mail [lixin.jiang@fwoxford.org](mailto:lixin.jiang@fwoxford.org)

© 2013 American Heart Association, Inc.

*Circ Cardiovasc Qual Outcomes* is available at <http://circoutcomes.ahajournals.org>

DOI: 10.1161/CIRCOUTCOMES.113.000441

For peer review only - <http://bmjopen.bmj.com/site/about/guidelines.xhtml>

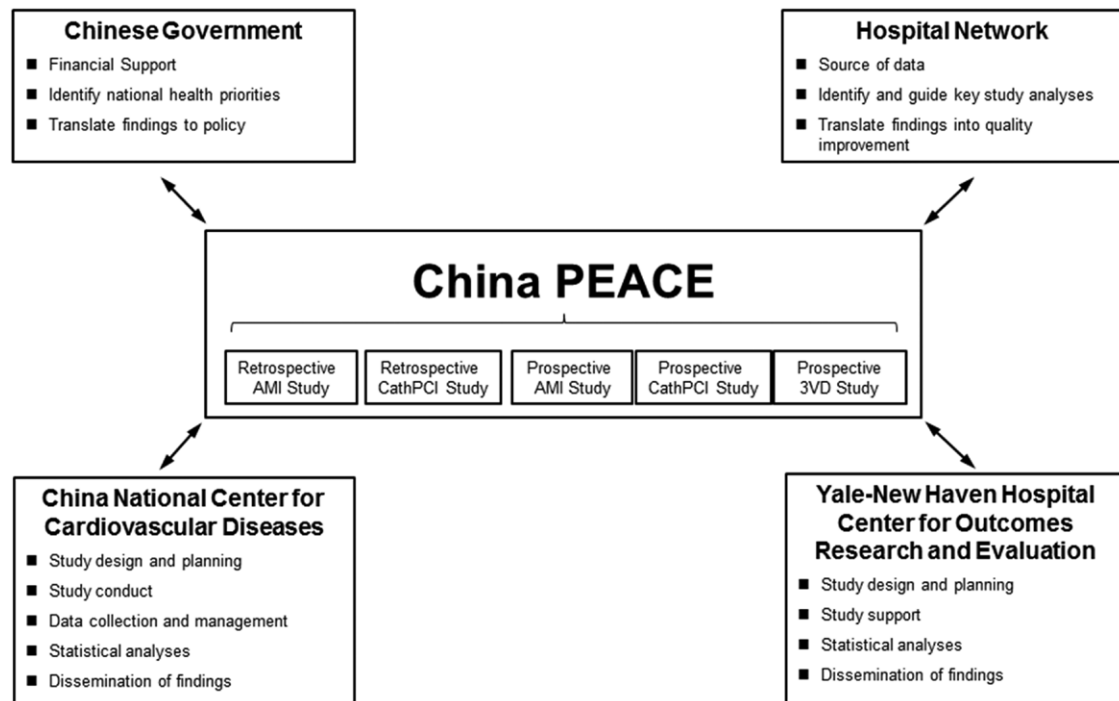

**Figure 1.** The China Patient-Centered Evaluative Assessment of Cardiac Events (PEACE) initiative. Key partners include the Chinese government, collaborating hospitals, the China National Center for Cardiovascular Disease, and the Yale-New Haven Hospital Center for Outcomes Research and Evaluation. The China PEACE-Retrospective AMI Study is 1 of 5 initial studies from the China PEACE initiative. The topic areas for these 5 projects concern acute myocardial infarction, coronary catheterization/percutaneous coronary intervention, and multi-vessel coronary artery disease. Future studies will focus on cerebrovascular disease and other cardiovascular conditions. 3VD indicates revascularization in patients with triple-vessel disease; AMI, acute myocardial infarction; and PCI, percutaneous coronary intervention.

government, and >200 Chinese hospitals have collaborated to create a national network for research and performance improvement. This platform, entitled China PEACE (Patient-Centered Evaluative Assessment of Cardiac Events), will permit rapid bidirectional flow of information between partnering hospitals and the coordinating center at the NCCD (Figure 1). With funding from the Chinese government, China PEACE will elucidate the clinical epidemiology of cardiovascular disease treatment and its associated outcomes across patients, hospitals, regions, and time. China PEACE, envisioned as a combined research and quality improvement initiative, will disseminate findings of the greatest relevance to participating hospitals and the Chinese government in a manner suitable for the evaluation of care and the development of projects to improve clinical quality and patient outcomes. Through the use of strategies most often used by clinical trials, data quality will be ensured by rigorous monitoring by the central coordinating center at the stages of case ascertainment, data abstraction, and data management. The collaborative research and performance improvement network created by China PEACE will ultimately be leveraged to improve patient outcomes for a broad range of conditions and may be a model for research and quality improvement in other international settings.

The first study from the China PEACE collaboration is the Retrospective Study of Acute Myocardial Infarction (China PEACE-Retrospective AMI Study). Previous research on the characteristics, treatments, and outcomes for patients hospitalized with acute myocardial infarction (AMI) in China has contributed important knowledge but has been largely limited to studies from tertiary care centers in urban regions,<sup>20-22</sup> major

metropolitan areas,<sup>23-25</sup> a small subset of provinces,<sup>26,27</sup> or to patients from clinical trial databases,<sup>28</sup> all of whom may not be representative of typical patients. Research involving a larger and more diverse distribution of study sites has contributed to our understanding of the use of evidence-based therapies after AMI,<sup>29</sup> including differences in treatment between secondary and tertiary hospitals<sup>30</sup> as well as in-hospital complications such as bleeding<sup>31</sup> and recurrent angina,<sup>32</sup> but it has not involved a large, nationally representative study population and has not examined temporal trends in AMI treatment and outcomes. These trends over time, in particular, may reflect major changes in the Chinese healthcare system that have occurred in the past decade such as the expansion of health insurance from 30% to 90% of the population between 2001 and 2011,<sup>33</sup> greatly increased resources for rural healthcare beginning in 2003,<sup>34</sup> and further health reforms starting in 2009.<sup>35</sup> Data relating these health reforms to changing healthcare practices are limited. To address these gaps in knowledge, the China PEACE-Retrospective AMI Study will identify trends using a nationally representative sample of >18 000 patient records from 162 randomly selected hospitals for 2001, 2006, and 2011. The hospitals represent diverse geographic regions and include institutions with a range of cardiovascular facilities. Thus, this is the first truly national assessment of practice patterns and outcomes for AMI performed in China.

The China PEACE-Retrospective AMI Study broadly aims to promote improvements in AMI quality of care by generating knowledge about the characteristics, treatments, and outcomes of patients hospitalized with AMI across a representative



sample of Chinese hospitals during the past decade. The study is largely descriptive, and rather than test a specific hypothesis, it seeks to characterize current AMI care and associated patient outcomes to provide a foundation for future quality improvement and research. We do anticipate that there will be marked variation in practice and outcomes, demographic and geographic disparities, and ample opportunities for improvements. The specific aims of the China PEACE-Retrospective AMI Study are to (1) describe the characteristics of patients hospitalized with AMI in China, including their clinical and demographic attributes such as occupation and insurance status; (2) characterize patterns of in-hospital treatment, including the use of traditional Chinese medicines; (3) describe mortality rates and other in-hospital outcomes, including the development of heart failure and complications of treatment; (4) determine trends over time in patient characteristics, treatments, and outcomes; (5) develop and test prognostic scores to stratify risk; (6) compare treatment across regions and hospitals and determine whether differences in treatment patterns by setting may be associated with differences in outcomes; (7) examine the alignment of diagnostic testing and treatment strategies with quality measures; (8) compare differences in patient characteristics, treatment approaches, and outcomes between China and other countries; (9) determine the quality of documentation within the medical record; and (10) collaborate with participating hospitals and the Chinese government to disseminate study findings to improve quality of care and outcomes.

This article describes study methodology, abstracted data elements, analytic plan, and preliminary findings of the China PEACE-Retrospective AMI Study. Findings will identify opportunities for quality improvement and guide the development of strategies and tools to improve outcomes for AMI in China.

## Methods

### Design Overview

The China PEACE-Retrospective AMI Study will examine >18 000 hospitalizations for AMI from a nationally representative network of Chinese hospitals during 2001, 2006, and 2011. The study includes hospitalizations with a principal discharge diagnosis of AMI (International Classification of Diseases, Ninth Revision, Clinical Modification codes 410.xx or International Classification of Diseases, Tenth Revision, Clinical Modification codes I21.xx), including ST-segment-elevation myocardial infarction and non-ST-segment-elevation myocardial infarction. We did not include hospitalizations with a principal discharge diagnosis of unstable angina.

To study 10-year trends in patient characteristics, treatment patterns, and outcomes nationally and within regions of different socioeconomic development, we drew a random, representative sample of patient discharges for each year. We intentionally drew a larger sample for 2011 to study differences in treatment patterns and outcomes across hospitals.

The central ethics committee at the China NCCD approved the PEACE-Retrospective AMI Study. All collaborating hospitals accepted the central ethics approval except for 5 hospitals, which obtained local approval by internal ethics committees. The study is listed at [www.clinicaltrials.gov](http://www.clinicaltrials.gov) (NCT01624883).

The Chinese government, which provided financial support for the study, had no role in the design or conduct of the study; in the collection, management, analysis, and interpretation of the data; or in the preparation or approval of the article.

### Sampling Design

We intended study hospitals to reflect diverse sites of care in China. As hospital volumes and clinical capacities differ between urban and rural

areas, as well as among the 3 official economic-geographic regions of Mainland China, we separately identified hospitals in 5 strata: Eastern-rural, Central-rural, Western-rural, Eastern-urban, and Central/Western-urban regions. We considered an area urban if it is part of a downtown or suburban area within a direct-controlled municipality (Beijing, Tianjin, Shanghai, Chongqing) or 1 of 283 prefectural-level cities. We considered surrounding county-level regions, including counties and county-level cities, to be rural. Within this framework, Mainland China is composed of 287 urban regions and 2010 rural regions. We considered Central and Western-urban regions together given their similar per capita income and health services capacity.<sup>36</sup>

We identified cases for study inclusion using a stratified 2-stage cluster sampling design (Figure 2). In the first stage, we identified hospitals using a simple random sampling procedure within each of the 5 study strata. In the 3 rural strata, the sampling framework consisted of the central hospital in each of the predefined rural regions (2010 central hospitals in 2010 rural regions). Within each rural region, the central hospital is the largest general hospital with the greatest clinical capacity for treating acute illness, including AMI. In each of the 2 urban strata, the sampling framework consisted of the highest-level hospitals in each of the predefined urban regions (833 hospitals in 287 urban regions). Hospital level is officially defined by the Chinese government based on clinical resource capacity.<sup>37</sup> For example, secondary hospitals have  $\geq 100$  inpatient beds and the capacity to provide acute medical care and preventive care services to populations of  $\geq 100\,000$ , whereas tertiary hospitals are large referral centers in provincial capitals and major cities.<sup>29</sup> We excluded military hospitals, prison hospitals, specialized hospitals without a cardiovascular disease division, and traditional Chinese medicine hospitals. We decided to select representative hospitals from 2011 to reflect current practices and trace this hospital cohort backward to 2006 and 2001 to describe temporal trends. As the hospital number has grown by  $\approx 18\%$  during the past decade,<sup>36,38</sup> the study cohort should be most representative of national treatment patterns and outcomes in 2011.

In the second stage, we drew cases based on the local hospital database for patients with AMI at each sampled hospital using systematic random sampling procedures. In each of the 5 study strata, we determined the sample size required to achieve a 2% precision for describing the primary outcome, in-hospital mortality, which we had estimated to be  $\approx 9\%$  in urban hospitals and 7% in rural county-level hospitals.<sup>5</sup> To achieve a precision of 2% with an  $\alpha$  of 0.05 in each of the 3 rural strata, assuming an intraclass correlation of 0.02 and design effect of 1.8, we would need to sample 1150 medical records among hospitals with an average cluster size of 40. Analogously, to achieve a precision of 2% with an  $\alpha$  of 0.05 in each of the 2 urban strata, assuming an intraclass correlation of 0.02 and design effect of 2.2, we would need to sample 1750 medical records among hospitals with an average cluster size of 60. These cluster sizes in rural and urban settings seemed reasonable based on our previous survey of treatment for acute coronary syndromes at >1000 hospitals in 2010, which demonstrated that the median volume of hospitalization for AMI was  $\approx 180$  annual cases in urban hospitals and 95 annual cases in rural county-level hospitals. Assuming a participation rate of 85% among selected hospitals, we approached 35 hospitals for participation in each stratum for a total of 175 hospitals (70 urban and 105 rural). We doubled cluster sizes for 2011 to improve precision in the description of hospital-level treatment patterns and outcomes. Consequently, the total expected sample volume with the above assumptions was  $\approx 6950$  cases in 2001, 6950 cases in 2006, and 13 900 cases in 2011. A more detailed description of the sampling strategy used in the PEACE-Retrospective AMI Study is provided in the supplemental material.

### Data Collection

We trained staff at participating hospitals to identify all hospitalizations for AMI from their respective local hospital databases for the years 2001, 2006, and 2011. After we sampled cases at each hospital, we assigned each case a unique study ID. We then required local investigators to gather the original record, scan it, and transmit the scanned copy to the coordinating center. To facilitate this process, the coordinating center provided each study site with a high-speed scanner. To verify compliance with the case finding strategy, research

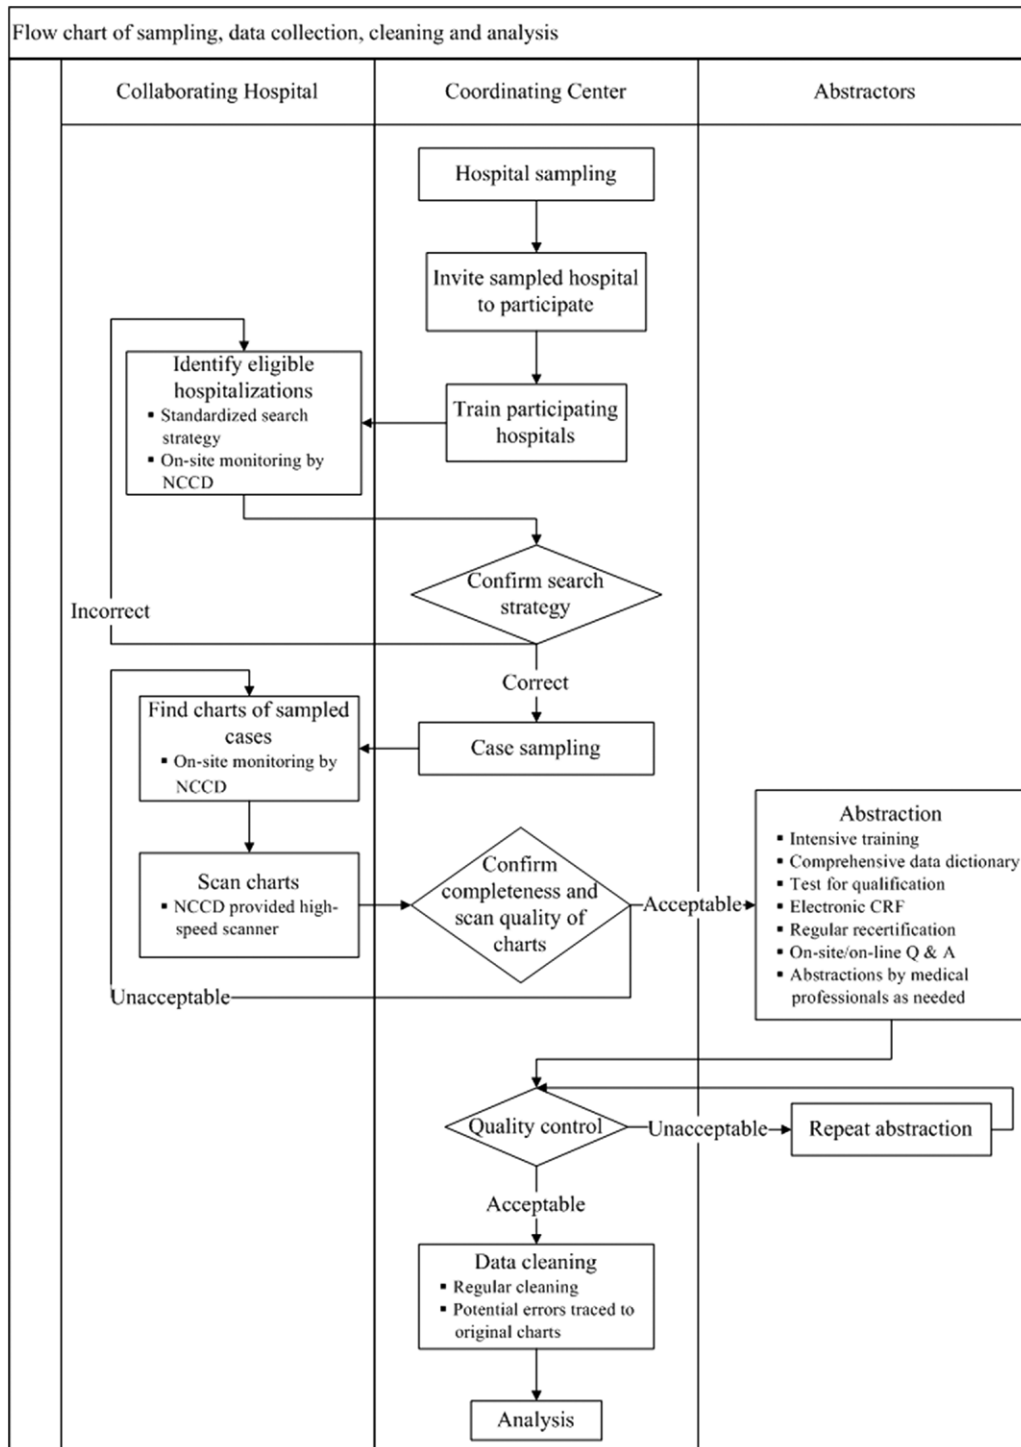

**Figure 2.** China Patient-Centered Evaluative Assessment of Cardiac Events (PEACE) Retrospective Study of Acute Myocardial Infarction flow chart and associated quality assurance strategies. Flow chart should be read from top to bottom. CRF indicates case report form; NCCD, China National Center for Cardiovascular Diseases; and Q&A, questions and answers.

staff from the study coordinating center visited 46 study sites to repeat the case finding process, confirm that the list of hospitalizations with AMI was complete, and assist in acquiring the sampled cases (Figure 2). These 46 sites provided ≈50% of sampled cases for the China PEACE-Retrospective AMI Study.

After identifying all medical records for sampled cases, participating hospitals copied and transmitted the records to the NCCD after deidentification. Research staff ensured the completeness and quality with which each medical record was scanned; incomplete or

poorly scanned records were rescanned and retransmitted (Figure 2). We instructed study sites to include all parts of the medical record, including the face sheet, admission note, daily progress notes, procedure notes, medication administration record, diagnostic procedure reports, laboratory test results, physician orders, nursing notes, and discharge summary. These subdivisions of the medical record are routinely present throughout China.

The China PEACE-Retrospective AMI Study has adhered to rigorous standards for abstraction. Before initiating chart review, each

Downloaded from <http://ahajournals.org> by on July 28, 2019



abstractor received 2 weeks of training that included an introduction to the study and instruction about coronary heart disease and its subtypes, component parts of the inpatient medical record including specialized sections such as catheterization reports, and the China PEACE-Retrospective AMI Study data dictionary. We provided all material, including the data dictionary, in Chinese. After training, we certified trainees who were able to abstract 10 sample medical records with >98% accuracy (online-only Data Supplement).

The China PEACE-Retrospective AMI Study used several strategies to improve the accuracy of abstraction. Inexperienced abstractors began with exclusively typewritten rather than hand written medical records. In addition, we randomly audited ≈5% of the abstracted records. If the records were not abstracted with 98% accuracy, all medical records in the audited batch were considered unqualified and were rereviewed by a different abstractor. We used abstractors with formal medical training to identify data elements requiring more advanced medical knowledge for recognition, such as the presence of comorbidities, evidence of pulmonary edema on hospital presentation, and the development of postprocedural complications, such as bleeding or arrhythmia. A physician was always present in the room with abstractors or was available online to answer questions as they arose. As problems were identified, we updated the data dictionary and web-based data management program built for the China PEACE-Retrospective AMI Study into which data were directly entered. We have additionally customized this program to expedite the identification of medications that may have multiple trade names. Finally, we assigned medical records belonging to the same hospital and year to a broad group of reviewers to avoid potential residual disparities in quality among abstractors (online-only Data Supplement).

### Data Management

We have treated all data as protected health information and have securely stored it in an encrypted and password-protected database at the coordinating center. We have securely stored paper charts in locked rooms.

We perform ongoing data cleaning systematically. Data managers regularly query data for invalid and illogical values, as well as for duplicate record entries. They identify potential invalid values by searching for outliers in continuous data distributions. Records with identical study identification numbers, hospital identification numbers, medical record identification numbers, and dates of discharge trigger a search for duplicate records. Once a potential error is found, data managers trace and review the relevant records to resolve the issue.

### Data Elements

We examined both the English language and the Chinese literature for relevant studies to create a candidate list of potential data elements. Where possible, we included elements particular to the Chinese context such as the use of traditional Chinese medicines. We supplemented these elements with variables used in the Get with the Guidelines ACTION (Acute Coronary Treatment and Intervention Outcomes Network) Registry of the National Cardiovascular Data Registry (NCDR) and the Variation in Recovery: Role of Gender on Outcomes of Young Acute Myocardial Infarction Patients (VIRGO) study. ACTION is an outcome-based registry and quality improvement program that focuses on patients hospitalized with ST-segment–elevation myocardial infarction and non–ST-segment–elevation myocardial infarction.<sup>39</sup> VIRGO is a large, observational study of the presentation, treatment, and outcomes of young women and men with AMI.<sup>40</sup> The use of standardized elements from ACTION and VIRGO permit cross-country comparisons (Table 1). We performed pilot testing of the case report form on >500 medical records from study sites across China to enhance clarity of wording and further guide variable selection. We present data relevant to performance measures during the first 24 hours of hospitalization and at hospital discharge in Table 2. Where possible, we collected data that would allow us to construct the core quality measures used and reported by the Centers for Medicare & Medicaid Services in the United States. Each participating hospital has also completed a survey, modeled on the annual survey of hospitals performed by the American Hospital Association, of its major structural and organizational characteristics.<sup>41</sup> Key variables assessed include bed size, annual volume of AMI, teaching status, and capacity to perform invasive revascularization procedures. The patient case report form and associated data dictionary are available in the online-only Data Supplement.

### Statistical Analyses

We will report summary statistics for patient characteristics, use of diagnostic tests, treatments received, and in-hospital outcomes including complications of care across study sites. Weighting will reflect the reciprocal of sampling probability. For each aim, we will use standard parametric and nonparametric techniques for observational data, including *t* tests,  $\chi^2$  tests, Wilcoxon rank-sum tests, and generalized linear models. Because patient characteristics, treatments, and outcomes may be correlated within study sites, analyses will account for the effect of clustering. To examine and adjust for differences between comparison groups, we will use linear, logistic, Cox proportional hazard, and Poisson models with a generalized estimating

**Table 1. China PEACE-Retrospective Study of Acute Myocardial Infarction Data Elements**

| Category                                     | Example Elements                                                                                               |
|----------------------------------------------|----------------------------------------------------------------------------------------------------------------|
| Patient demographics                         | Age, sex, ethnicity, postal code, occupation, and insurance status                                             |
| Medical history                              | Diabetes mellitus, hypertension, hyperlipidemia, vascular disease, and prior revascularization                 |
| Initial cardiac status                       | Heart rate, blood pressure, Killip class, heart failure, and cardiac arrest                                    |
| Laboratory values                            | Troponin, CK, CK-MB, BNP, sodium, BUN, creatinine, WBC count, and hemoglobin                                   |
| Medications including dose                   | Antithrombotic therapy, $\beta$ -blocker, ACE inhibitor/ARB, statin, and traditional Chinese medicines         |
| Revascularization                            | Fibrinolysis, PCI (access, anatomy, stent number, stent type, contrast dose, closure device), and CABG surgery |
| Diagnostic procedures                        | Echocardiogram, CT angiogram, stress testing, and chest radiograph                                             |
| Outcomes including in-hospital complications | Death, heart failure, shock, arrhythmia, stroke, bleeding, transfusion, and infection                          |

ACE indicates angiotensin-converting enzyme; ARB, angiotensin receptor blocker; BNP, brain natriuretic peptide; BUN, blood urea nitrogen; CABG, coronary artery bypass graft; CK, creatine kinase; CK-MB, creatine kinase-MB fraction; CT, computed tomography; PCI, percutaneous coronary intervention; PEACE, Patient-Centered Evaluative Assessment of Cardiac Events; and WBC, white blood cell.

For peer review only - <http://bmjopen.bmj.com/site/about/guidelines.xhtml>

**Table 2. China PEACE-Retrospective Study of Acute Myocardial Infarction Performance Measures**

| First 24 h                              | Discharge                                                       |
|-----------------------------------------|-----------------------------------------------------------------|
| Aspirin                                 | Aspirin                                                         |
| Heparin                                 | Clopidogrel                                                     |
| Evaluation of left ventricular function | β-blocker                                                       |
| Time to primary PCI                     | ACE inhibitor or ARB for LV systolic dysfunction                |
| Time to fibrinolysis                    | Statin                                                          |
| Overall reperfusion therapy             | Smoking cessation counseling<br>Cardiac rehabilitation referral |

ACE indicates angiotensin-converting enzyme; ARB, angiotensin receptor blocker; PEACE, Patient-Centered Evaluative Assessment of Cardiac Events; LV, left ventricle; and PCI, percutaneous coronary intervention.

equation approach and hierarchical models, where appropriate. We will develop models to stratify patients according to their risk of adverse outcomes. We will assess the relationship of candidate variables to in-hospital outcomes using appropriate statistical techniques for the dependent variable. We will further refine the list of candidate variables based on their clinical relevance.

**Progress to Date**

As of May 2013, 162 hospitals have agreed to participate in the China PEACE-Retrospective AMI Study (Figure 3). Of the 13 that did not participate, 7 did not have admissions for AMI, and 6 declined participation. Examination of patient databases from participating hospitals yielded 31 601 hospitalizations for AMI (3859 in 2001, 8863 in 2006, and 18 879 in 2011). Of these, we sampled 18 631 for the China PEACE-Retrospective AMI Study (2801 in 2001, 5199 in 2006, and 10 631 in 2011). Of these 18 631 sampled hospitalizations, we acquired medical records for 18 110 (97.2%) and began data abstraction in August 2012. Medical records from 95% (154) of study sites contained all expected sections and represent 89% of all hospitalizations in the China PEACE-Retrospective AMI Study. In the remaining 8 study sites, we did not have access to daily progress notes because of local administrative policies of hospital archives departments.

However, these records were considered adequate for inclusion in the study. The use of electronic medical records increased with time: 0% of hospitals used electronic medical records in 2001, 7% of hospitals used electronic medical records in 2006, and 46% of hospitals used electronic medical records in 2011. We will code hospital-level variables for the presence of daily progress notes and electronic medical records to better understand whether these factors introduce bias into study results.

To verify the accuracy of principal discharge diagnoses, we randomly selected 300 medical records and examined concordance between principal discharge diagnosis and electrocardiographic findings consistent with the subtype of AMI (ST-segment-elevation myocardial infarction versus non-ST-segment-elevation myocardial infarction). We found concordance in 95% of cases.

**Discussion**

Akin to the Cooperative Cardiovascular Project in the United States,<sup>42</sup> China PEACE provides a platform through which government, healthcare providers, and research organizations can translate knowledge of the clinical epidemiology of cardiovascular disease into improved care for patients. In the United States, collaboration between the Healthcare Financing Administration, hospitals, and academic researchers demonstrated frequent underuse of evidence-based therapies for AMI.<sup>43</sup> Rapid feedback of these findings to hospitals resulted in significant improvement in performance on all studied quality indicators and reduced mortality.<sup>44</sup> China PEACE has similar potential to serve as a foundational project that evaluates and, if necessary, elevates cardiovascular care more generally within China. As with the United States in the early 1990s, China is turning increased attention to the treatment of patients hospitalized with acute cardiovascular conditions<sup>45</sup> to improve outcomes across diverse patient populations and sites of care. China PEACE will leverage the unique resources of the Chinese government, a diverse hospital network, and an international research team to translate study findings into action for the benefit of patients.

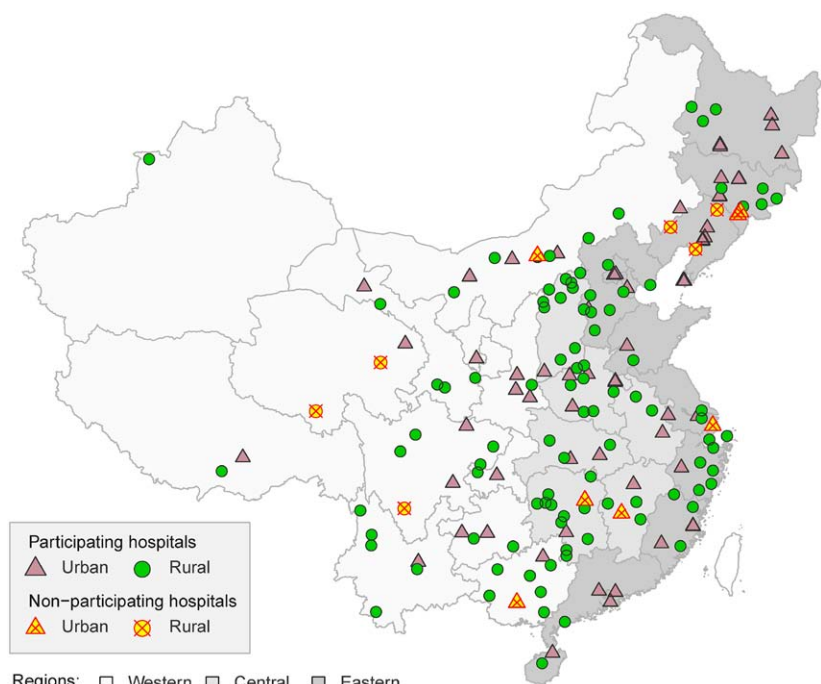

**Figure 3.** Geographic distribution of participating hospitals in the China Patient-Centered Evaluative Assessment of Cardiac Events (PEACE) Retrospective Study of Acute Myocardial Infarction (AMI). Of 175 sampled hospitals, 13 were unable or unwilling to participate, and 162 provided cases for the China PEACE-Retrospective AMI Study.

Downloaded from <http://ahajournals.org> by on July 28, 2019

The partnership among government, hospitals, and researchers is a critical source of strength for China PEACE. For example, clinical champions have informed the content of case report forms, thereby increasing the likelihood that study questions and findings are relevant at the front lines of care. Continuing conversations with hospitals will help align planned analyses to the areas of greatest concern and uncertainty for providers. The NCCD will tailor performance feedback reports to the information needs and clinical goals of each hospital. For example, the NCCD will be able to benchmark site-specific data on patient characteristics, receipt of evidence-based treatment, and outcomes to nearby hospitals, hospitals with similar case mix, top performing hospitals, the full spectrum of Chinese hospitals, or international institutions. In addition, the research teams will serve as hubs to ensure the rapid transfer of data, including information on best practices, between hospitals, and the Chinese government. The direct ties to government will increase the likelihood that study findings influence policy pertinent to AMI and cardiovascular care. Such an arrangement may also facilitate the creation of clinical tools to improve care, such as standing order templates, risk stratification algorithms, and dosing pocket cards.

China PEACE is further distinguished by its use of data quality control strategies, which are much more common in multinational clinical trials than in large retrospective studies. In particular, the China PEACE-Retrospective AMI Study has devoted significant attention to data quality at the stages of case ascertainment, data abstraction, and data management. For example, research staff rigorously monitored study sites to identify all hospitalizations for AMI from census databases. Staff also ensured that medical records for sampled cases were physically found, properly copied, and transmitted in full whenever possible. In addition, the China PEACE-Retrospective AMI Study provided central training for abstractors and required rigorous standards for both initial certification and recertification. Medical records from abstractors who did not achieve recertification requirements were reabstracted by a second reviewer. In developing these systems, China PEACE is also positioned for future studies.

The China PEACE-Retrospective AMI Study has several additional strengths. It contains the largest representative sample of hospitalizations for AMI in China and therefore includes patients from diverse geographic regions and institutions with widely varying resource capacities. Its inclusion of data from 2001, 2006, and 2011 will permit the assessment of trends in patient characteristics, care patterns, and outcomes. Information will be available on topics that have not been well studied (eg, the use of traditional Chinese medicines after AMI). Cross-country comparisons will be possible given the alignment of key data elements with the NCDR ACTION Registry and VIRGO. Finally, further targeted examination of additional data elements not included in the initial case report forms can be performed as novel questions arise, as the NCCD will maintain a physical copy of all charts after the initial abstraction.

The China PEACE-Retrospective AMI Study has some limitations. Study findings depend on the accuracy and completeness of the abstracted medical records. However, this limitation pertains to all retrospective chart reviews, including those performed by the Cooperative Cardiovascular Project and registries.

Lack of completeness may signal problems with documentation that are important to note, as detailed and reliable record keeping is needed to measure key processes and outcomes in quality improvement. Therefore, the assessment of the quality of the medical record can be an important contribution of this effort. The China PEACE-Retrospective AMI Study is also restricted to measuring in-hospital outcomes, as we are unable to link patient-level data to a national registry of deaths. However, the length of stay in Chinese hospitals, extended compared with that of many Western countries,<sup>5,36,46,47</sup> should permit more robust estimates of short-term complications including death. Next, we are unable to report on hospital costs and cost-effectiveness related to care for AMI, as well as patient out-of-pocket costs, as this information is not available in the standard medical record, which only contains information on the total charge for hospitalization. Finally, study precision will be slightly lower than anticipated, as we collected data from  $\approx 18\,000$  medical records rather than the anticipated 28 000. This discrepancy resulted from the substantially lower volume of hospitalizations for AMI than had been anticipated for the years 2001 and 2006, in particular. Our estimates, which were based on 2010 survey data, did not fully account for the marked increase in AMI hospitalizations that we identified between 2001 and 2011. However, the smaller sample size than expected should not substantively affect the precision with which major outcomes such as mortality are described, as expected strata-level precision for mortality decreased by no more than 2% in rural areas and no more than 1% in urban areas (online-only Data Supplement).

China PEACE will ensure transparency in research design, performance, and reporting. Although the Chinese government has funded China PEACE, it has no role in conduct of the study. We will perform all analyses in academic research units at the China NCCD and the Yale-New Haven Hospital Center for Outcomes Research and Evaluation. Government approval of articles will not be required before publication.

China PEACE is intended to spur similar collaborations among government, healthcare institutions, and academic researchers to better understand cardiovascular disease incidence, treatment, and outcomes. Partnerships among local hospitals at the front line of care, domestic research organizations with local expertise and previous track records of success, international experts in research design, and policy-makers intent on improving population health can identify important targets for study, build novel research networks, and generate tools useful in improving health outcomes. These partnerships can support a research and health improvement infrastructure that is unconstrained by particular diseases or conditions and is capable of facilitating clinical trials and performance improvement activities. In the future we will seek to involve patients and caregivers in the research team. The China PEACE-Retrospective AMI Study is the first of many projects that can leverage the China PEACE platform to elucidate the patterns of care and outcomes of cardiovascular disease across patients, hospitals, and regions within China.

### Acknowledgments

We appreciate the guidance provided by Prof Liming Li (Chinese Academy of Medical Sciences), Prof Zhengming Chen (University of Oxford), Dr Jun Lv, and Dr Qiushan Tao (Peking University) with



regard to study design. We appreciate the multiple contributions made by study teams at the China Oxford Centre for International Health Research and the Yale-New Haven Hospital Center for Outcomes Research and Evaluation in the realms of study design and operations. We are grateful for the support provided by the Chinese government.

### Sources of Funding

This project was partly supported by grant 201202025 from the Ministry of Health of China. Dr Dharmarajan is supported by grant HL007854 from the National Heart, Lung, and Blood Institute; he is also supported as a Centers of Excellence Scholar in Geriatric Medicine at Yale by the John A. Hartford Foundation and the American Federation for Aging Research. Dr Krumholz is supported by grant U01 HL105270-03 (Center for Cardiovascular Outcomes Research at Yale University) from the National Heart, Lung, and Blood Institute. The sponsors had no role in the conduct of the study; in the collection, management, analysis, and interpretation of the data; or in the preparation or approval of the article.

### Disclosures

None.

### References

- He J, Gu D, Wu X, Reynolds K, Duan X, Yao C, Wang J, Chen CS, Chen J, Wildman RP, Klag MJ, Whelton PK. Major causes of death among men and women in China. *N Engl J Med*. 2005;353:1124–1134.
- Yang G, Wang Y, Zeng Y, Gao GF, Liang X, Zhou M, Wan X, Yu S, Jiang Y, Naghavi M, Vos T, Wang H, Lopez AD, Murray CJ. Rapid health transition in China, 1990–2010: findings from the Global Burden of Disease Study 2010. *Lancet*. 2013;381:1987–2015.
- Yeh RW, Sidney S, Chandra M, Sorel M, Selby JV, Go AS. Population trends in the incidence and outcomes of acute myocardial infarction. *N Engl J Med*. 2010;362:2155–2165.
- Go AS, Mozaffarian D, Roger VL, Benjamin EJ, Berry JD, Borden WB, Bravata DM, Dai S, Ford ES, Fox CS, Franco S, Fullerton HJ, Gillespie C, Hailpern SM, Heit JA, Howard VJ, Huffman MD, Kissela BM, Kittner SJ, Lackland DT, Lichtman JH, Lisabeth LD, Magid D, Marcus GM, Marelli A, Matchar DB, McGuire DK, Mohler ER, Moy CS, Mussolino ME, Nichol G, Paynter NP, Schreiner PJ, Sorlie PD, Stein J, Turan TN, Virani SS, Wong ND, Woo D, Turner MB; American Heart Association Statistics Committee and Stroke Statistics Subcommittee. Heart disease and stroke statistics—2013 update: a report from the American Heart Association. *Circulation*. 2013;127:e6–e245.
- Tunstall-Pedoe H, Kuulasmaa K, Mähönen M, Tolonen H, Ruokokoski E, Amouyel P. Contribution of trends in survival and coronary-event rates to changes in coronary heart disease mortality: 10-year results from 37 WHO MONICA project populations: monitoring trends and determinants in cardiovascular disease. *Lancet*. 1999;353:1547–1557.
- Yang G, Kong L, Zhao W, Wan X, Zhai Y, Chen LC, Koplan JP. Emergence of chronic non-communicable diseases in China. *Lancet*. 2008;372:1697–1705.
- Hu SS, Kong LZ, Gao RL, Zhu ML, Wang W, Wang YJ, Wu ZS, Chen WW, Liu MB; Editorial Board. Outline of the report on cardiovascular disease in China, 2010. *Biomed Environ Sci*. 2012;25:251–256.
- Wu Z, Yao C, Zhao D, Wu G, Wang W, Liu J, Zeng Z, Wu Y. Sino-MONICA project: a collaborative study on trends and determinants in cardiovascular diseases in China, Part I: morbidity and mortality monitoring. *Circulation*. 2001;103:462–468.
- Zhao D, Liu J, Wang W, Zeng Z, Cheng J, Liu J, Sun J, Wu Z. Epidemiological transition of stroke in China: twenty-one-year observational study from the Sino-MONICA-Beijing Project. *Stroke*. 2008;39:1668–1674.
- Moran A, Gu D, Zhao D, Coxson P, Wang YC, Chen CS, Liu J, Cheng J, Bibbins-Domingo K, Shen YM, He J, Goldman L. Future cardiovascular disease in China: Markov model and risk factor scenario projections from the coronary heart disease policy model-China. *Circ Cardiovasc Qual Outcomes*. 2010;3:243–252.
- Zhang XH, Lu ZL, Liu L. Coronary heart disease in China. *Heart*. 2008;94:1126–1131.
- Yong H, Foody J, Linong J, Dong Z, Wang Y, Ma L, Meng HJ, Shiff S, Dayi H. A systematic literature review of risk factors for stroke in China. *Cardiol Rev*. 2013;21:77–93.
- Critchley J, Liu J, Zhao D, Wei W, Capewell S. Explaining the increase in coronary heart disease mortality in Beijing between 1984 and 1999. *Circulation*. 2004;110:1236–1244.
- Ma GS, Li YP, Wu YF, Zhai FY, Cui ZH, Hu XQ, Luan DC, Hu YH, Yang XG. The prevalence of body overweight and obesity and its changes among Chinese people during 1992 to 2002. *Zhonghua Yu Fang Yi Xue Za Zhi*. 2005;39:311–315.
- Wu Y. Overweight and obesity in China. *BMJ*. 2006;333:362–363.
- Wang H, Du S, Zhai F, Popkin BM. Trends in the distribution of body mass index among Chinese adults, aged 20–45 years (1989–2000). *Int J Obes (Lond)*. 2007;31:272–278.
- Yang G, Fan L, Tan J, Qi G, Zhang Y, Samet JM, Taylor CE, Becker K, Xu J. Smoking in China: findings of the 1996 National Prevalence Survey. *JAMA*. 1999;282:1247–1253.
- Gu D, Wu X, Reynolds K, Duan X, Xin X, Reynolds RF, Whelton PK, He J; InterASIA Collaborative Group. Cigarette smoking and exposure to environmental tobacco smoke in China: the international collaborative study of cardiovascular disease in Asia. *Am J Public Health*. 2004;94:1972–1976.
- Chen R, Zhang Y, Yang C, Zhao Z, Xu X, Kan H. Acute Effect of Ambient Air Pollution on Stroke Mortality in the China Air Pollution and Health Effects Study. *Stroke*. 2013.
- Yang XD, Zhao YS, Li YF, Guo XH. Medical comorbidities at admission is predictive for 30-day in-hospital mortality in patients with acute myocardial infarction: analysis of 5161 cases. *J Geriatr Cardiol*. 2011;8:31–34.
- Zhang H, Sun S, Tong L, Li R, Cao XH, Zhang BH, Zhang LH, Huang JX, Ma CS. Effect of cigarette smoking on clinical outcomes of hospitalized Chinese male smokers with acute myocardial infarction. *Chin Med J (Engl)*. 2010;123:2807–2811.
- Chu PH, Chiang CW, Cheng NJ, Ko YL, Chang CJ, Chen WJ, Kuo CT, Hsu TS, Lee YS. Gender differences in baseline variables, therapies and outcomes in Chinese patients with acute myocardial infarction. *Int J Cardiol*. 1998;65:75–80.
- Wang SR, Liu HX, Zhao D, Lei Y, Wang W, Shang JJ, Fang YT, Shi ZX, Huang Y, Li QL; Beijing Collaborative Study Group on Therapies Status of Acute Myocardial Infarction. Study on the therapeutic status of 1242 hospitalized acute myocardial infarction patients in Beijing. *Zhonghua Liu Xing Bing Xue Za Zhi*. 2006;27:991–995.
- Zhang SY, Hu DY, Sun YH, Yang JG. Current management of patients with ST elevation myocardial infarction in Metropolitan Beijing, China. *Clin Invest Med*. 2008;31:E189–E197.
- Song L, Hu DY, Yang JG, Sun YH, Liu SS, Li C, Feng Q, Wu D. Factors leading to delay in decision to seek treatment in patients with acute myocardial infarction in Beijing. *Zhonghua Nei Ke Za Zhi*. 2008;47:284–287.
- Yu LT, Zhu J, Mister R, Zhang Y, Li JD, Wang DL, Liu LS, Flather M. The Chinese registry on reperfusion strategies and outcomes in ST-elevation myocardial infarction. *Zhonghua Xin Xue Guan Bing Za Zhi*. 2006;34:593–597.
- Zhang B, Jiang DM, Zhou XC, Liu J, Zhang W, Sun YJ, Ren LN, Zhang ZH, Gao Y, Li YZ, Shi JP, Qi GX. Prospective multi-center study of female patients with ST-elevation myocardial infarction in Liaoning province, China. *Chin Med J (Engl)*. 2012;125:1915–1919.
- Shao XH, Yang YM, Zhu J, Liu LS; China CREATE Investigation Group. Comparison on therapeutic approach and short-term outcomes between male and female patients with ST-segment elevation myocardial infarction. *Zhonghua Xin Xue Guan Bing Za Zhi*. 2012;40:108–114.
- Gao R, Patel A, Gao W, Hu D, Huang D, Kong L, Qi W, Wu Y, Yang Y, Harris P, Algert C, Groenestein P, Turnbull F; CPACS Investigators. Prospective observational study of acute coronary syndromes in China: practice patterns and outcomes. *Heart*. 2008;94:554–560.
- Liu Q, Zhao D, Liu J, Wang W, Liu J; Bridging the Gap on Coronary Heart Disease Secondary Prevention in China. Current clinical practice patterns and outcome for acute coronary syndromes in China: results of BRIG project. *Zhonghua Xin Xue Guan Bing Za Zhi*. 2009;37:213–217.
- Liu X, Chen YD, Lü SZ, Jin ZN, Liu H, Song XT; China GRACE Investigation Group. Analysis of the risk factors of patients with acute coronary syndrome sufferin hemorrhage during hospitalization. *Zhonghua Xin Xue Guan Bing Za Zhi*. 2012;40:902–907.
- Zhao FH, Chen YD, Song XT, Pan WQ, Jin ZN, Yuan F, Li YB, Ren F, Lü SZ; Sino-GRACE investigators. Predictive factors of recurrent angina after acute coronary syndrome: the global registry acute coronary events from China (Sino-GRACE). *Chin Med J (Engl)*. 2008;121:12–16.
- Cao Q, Shi L, Wang H, Dong K. Report from China: health insurance in China—evolution, current status, and challenges. *Int J Health Serv*. 2012;42:177–195.

Downloaded from <http://ahajournals.org> by on July 28, 2019

- 1  
2  
3  
4  
5  
6  
7  
8  
9  
10  
11  
12  
13  
14  
15  
16  
17  
18  
19  
20  
21  
22  
23  
24  
25  
26  
27  
28  
29  
30  
31  
32  
33  
34  
35  
36  
37  
38  
39  
40  
41  
42  
43  
44  
45  
46  
47  
48  
49  
50  
51  
52  
53  
54  
55  
56  
57  
58  
59  
60
34. Hu S, Tang S, Liu Y, Zhao Y, Escobar ML, de Ferranti D. Reform of how health care is paid for in China: challenges and opportunities. *Lancet*. 2008;372:1846–1853.
35. Chen Z. Launch of the health-care reform plan in China. *Lancet*. 2009;373:1322–1324.
36. Ministry of Health of the People's Republic of China. *China Public Health Statistical Yearbook 2011*. Beijing: Peking Union Medical College Publishing House; 2011.
37. Ministry of Health of the People's Republic of China. *The Performance Evaluation Standards for General Hospitals (Revised Version)*. 2009. <http://www.moh.gov.cn/cmsresources/mohbgt/cmsrdocument/doc6535.pdf>. Accessed May 28, 2013.
38. Ministry of Health of the People's Republic of China. *China Public Health Statistical Yearbook 2003*. Beijing: Peking Union Medical College Publishing House; 2003.
39. Peterson ED, Roe MT, Rumsfeld JS, Shaw RE, Brindis RG, Fonarow GC, Cannon CP. A call to ACTION (acute coronary treatment and intervention outcomes network): a national effort to promote timely clinical feedback and support continuous quality improvement for acute myocardial infarction. *Circ Cardiovasc Qual Outcomes*. 2009;2:491–499.
40. Lichtman JH, Lorenze NP, D'Onofrio G, Spertus JA, Lindau ST, Morgan TM, Herrin J, Bueno H, Mattera JA, Ridker PM, Krumholz HM. Variation in recovery: role of gender on outcomes of young AMI patients (VIRGO) study design. *Circ Cardiovasc Qual Outcomes*. 2010;3:684–693.
41. American Hospital Association. *AHA Annual Survey Database Fiscal Year 2011*. <http://www.ahadataviewer.com/book-cd-products/aha-survey/>. Accessed May 27, 2013.
42. Vogel RA. HCFA's Cooperative Cardiovascular Project: a nationwide quality assessment of acute myocardial infarction. *Clin Cardiol*. 1994;17:354–356.
43. Ellerbeck EF, Jencks SF, Radford MJ, Kresowik TF, Craig AS, Gold JA, Krumholz HM, Vogel RA. Quality of care for Medicare patients with acute myocardial infarction: a four-state pilot study from the Cooperative Cardiovascular Project. *JAMA*. 1995;273:1509–1514.
44. Marciniak TA, Ellerbeck EF, Radford MJ, Kresowik TF, Gold JA, Krumholz HM, Kiefe CI, Allman RM, Vogel RA, Jencks SF. Improving the quality of care for Medicare patients with acute myocardial infarction: results from the Cooperative Cardiovascular Project. *JAMA*. 1998;279:1351–1357.
45. Chinese Center for Disease Control and Prevention. *Early diagnosis and treatment are low for patients with acute myocardial infarction in China*. [http://www.chinacdc.cn/mtdx/mxfcrxjbx/201210/t20121015\\_70567.htm](http://www.chinacdc.cn/mtdx/mxfcrxjbx/201210/t20121015_70567.htm). Accessed February 11, 2013.
46. Chen ZM, Pan HC, Chen YP, Peto R, Collins R, Jiang LX, Xie JX, Liu LS; COMMIT (Clopidogrel and Metoprolol in Myocardial Infarction Trial) collaborative group. Early intravenous then oral metoprolol in 45,852 patients with acute myocardial infarction: randomised placebo-controlled trial. *Lancet*. 2005;366:1622–1632.
47. Chen ZM, Jiang LX, Chen YP, Xie JX, Pan HC, Peto R, Collins R, Liu LS; COMMIT (Clopidogrel and Metoprolol in Myocardial Infarction Trial) collaborative group. Addition of clopidogrel to aspirin in 45,852 patients with acute myocardial infarction: randomised placebo-controlled trial. *Lancet*. 2005;366:1607–1621.

1  
2  
3 National Clinical Research Center for Cardiovascular Diseases  
4  
5 Fuwai Hospital  
6  
7 167 Beilishi Road  
8  
9 Beijing 100037  
10  
11 People's Republic of China  
12  
13

14 July 01, 2019  
15

16  
17  
18 Dr. Adrian Aldcroft,  
19 Editor,  
20  
21 *BMJ Open*  
22  
23

24  
25 Dear Dr. Aldcroft,  
26  
27

28  
29 We are writing to submit our manuscript entitled “Use of Intravenous Magnesium Sulfate among  
30 Patients with Acute Myocardial Infarction in China from 2001 to 2015: China PEACE-  
31 Retrospective AMI Study” for your consideration for publication in *BMJ Open*. We believe this  
32 manuscript is a valuable contribution to the literature examining de-adoption of ineffective  
33 therapy in clinical practice in China and other countries.  
34  
35

36 This manuscript submitted provided a detailed analysis of the trends and variation in use of IV  
37 magnesium sulfate in a nationally representative sample of about 24,000 patients with AMI over  
38 the past fifteen years. To our knowledge, limited data in China and other countries substantiate  
39 this subject. In our study, we found that the de-adoption of magnesium sulfate for AMI is  
40 suboptimal, with 17% of patients with AMI given IV magnesium sulfate in 2015. The decrease  
41 of rate was slowing down and stabilized around an unacceptably high level recently.  
42  
43

44 Furthermore, IV magnesium sulfate use is neither associated with particular hospital  
45 characteristics, nor geographic/socio-economic regions. The findings highlighted the gaps in  
46 performance and called for further researches on the causes.  
47  
48

49 Our work provides a critical evaluation of the ineffective therapy in healthcare across the  
50 country, and implies that efforts aiming to more efficient mechanisms to translate evidence-  
51  
52  
53

1  
2  
3 based therapies into clinical practice in China are needed. China's experiences could be highly  
4 relevant to many low- and middle-income countries facing similar challenges over the world. We  
5 believe this study will be of major interest to the readership of *BMJ Open*.  
6  
7  
8  
9

10 As the corresponding author, I take full responsibility for the content of this submission. I had  
11 full access to all the data and final responsibility for the decision to submit for publication. All  
12 authors contributed substantively to the manuscript and have approved the submission in its final  
13 form. The manuscript has not been submitted elsewhere, or published elsewhere in whole or in  
14 part in any language.  
15  
16  
17  
18

19 This project was partly supported by the National Key Research and Development Program from  
20 the Ministry of Science and Technology of China, the Major Public Health Service Project from  
21 the Ministry of Finance and National Health and Family Planning Commission of China, the 111  
22 Project from the Ministry of Education of China. The funders had no role in study design, data  
23 collection and analysis, decision to publish, or preparation of the manuscript.  
24  
25  
26  
27  
28

29 We declare no relevant conflicts of interest.  
30

31 We are grateful to you for considering our manuscript.  
32  
33  
34  
35  
36  
37  
38

39 Yours sincerely  
40  
41

42 Dr. Xi Li  
43  
44  
45  
46  
47  
48  
49  
50  
51  
52  
53  
54  
55  
56  
57  
58  
59  
60

# BMJ Open

## Use of Intravenous Magnesium Sulfate among Patients with Acute Myocardial Infarction in China from 2001 to 2015: China PEACE-Retrospective AMI Study

|                               |                                                                                                                                                                                                                                                                                                                                                                                                                                                                                                                                                                                                                                                                                                                                                                                                                                                                                                                                                                                                                                                                                                                                                                                                                                                                                                                                                                                                                                                                                                                                                                                                                                                                                                                                                                                                                                                                                                                                                                                                                                                                                                                                                                                                                                                                                                      |
|-------------------------------|------------------------------------------------------------------------------------------------------------------------------------------------------------------------------------------------------------------------------------------------------------------------------------------------------------------------------------------------------------------------------------------------------------------------------------------------------------------------------------------------------------------------------------------------------------------------------------------------------------------------------------------------------------------------------------------------------------------------------------------------------------------------------------------------------------------------------------------------------------------------------------------------------------------------------------------------------------------------------------------------------------------------------------------------------------------------------------------------------------------------------------------------------------------------------------------------------------------------------------------------------------------------------------------------------------------------------------------------------------------------------------------------------------------------------------------------------------------------------------------------------------------------------------------------------------------------------------------------------------------------------------------------------------------------------------------------------------------------------------------------------------------------------------------------------------------------------------------------------------------------------------------------------------------------------------------------------------------------------------------------------------------------------------------------------------------------------------------------------------------------------------------------------------------------------------------------------------------------------------------------------------------------------------------------------|
| Journal:                      | <i>BMJ Open</i>                                                                                                                                                                                                                                                                                                                                                                                                                                                                                                                                                                                                                                                                                                                                                                                                                                                                                                                                                                                                                                                                                                                                                                                                                                                                                                                                                                                                                                                                                                                                                                                                                                                                                                                                                                                                                                                                                                                                                                                                                                                                                                                                                                                                                                                                                      |
| Manuscript ID                 | bmjopen-2019-033269.R1                                                                                                                                                                                                                                                                                                                                                                                                                                                                                                                                                                                                                                                                                                                                                                                                                                                                                                                                                                                                                                                                                                                                                                                                                                                                                                                                                                                                                                                                                                                                                                                                                                                                                                                                                                                                                                                                                                                                                                                                                                                                                                                                                                                                                                                                               |
| Article Type:                 | Original research                                                                                                                                                                                                                                                                                                                                                                                                                                                                                                                                                                                                                                                                                                                                                                                                                                                                                                                                                                                                                                                                                                                                                                                                                                                                                                                                                                                                                                                                                                                                                                                                                                                                                                                                                                                                                                                                                                                                                                                                                                                                                                                                                                                                                                                                                    |
| Date Submitted by the Author: | 20-Jan-2020                                                                                                                                                                                                                                                                                                                                                                                                                                                                                                                                                                                                                                                                                                                                                                                                                                                                                                                                                                                                                                                                                                                                                                                                                                                                                                                                                                                                                                                                                                                                                                                                                                                                                                                                                                                                                                                                                                                                                                                                                                                                                                                                                                                                                                                                                          |
| Complete List of Authors:     | <p>Wang, Xianqiang; National Clinical Research Center of Cardiovascular Diseases, State Key Laboratory of Cardiovascular Disease, Fuwai Hospital, National Center for Cardiovascular Diseases, Chinese Academy of Medical Sciences and Peking Union Medical College, Beijing, People's Republic of China</p> <p>Du, Xue; National Clinical Research Center of Cardiovascular Diseases, State Key Laboratory of Cardiovascular Disease, Fuwai Hospital, National Center for Cardiovascular Diseases, Chinese Academy of Medical Sciences and Peking Union Medical College, Beijing, People's Republic of China</p> <p>Yang, Hao; National Clinical Research Center of Cardiovascular Diseases, State Key Laboratory of Cardiovascular Disease, Fuwai Hospital, National Center for Cardiovascular Diseases, Chinese Academy of Medical Sciences and Peking Union Medical College, Beijing, People's Republic of China</p> <p>Bucholz, Emily ; Center for Outcomes Research and Evaluation, Yale-New Haven Hospital</p> <p>Downing, Nicholas ; Center for Outcomes Research and Evaluation, Yale-New Haven Hospital</p> <p>Spertus, John; St. Luke's Mid America Heart Institute, Cardiovascular Outcomes Research</p> <p>Masoudi, Fredrick; University of Colorado Anschutz Medical Campus, Medicine</p> <p>Li, Jing; National Clinical Research Center of Cardiovascular Diseases, State Key Laboratory of Cardiovascular Disease, Fuwai Hospital, National Center for Cardiovascular Diseases, Chinese Academy of Medical Sciences and Peking Union Medical College, Beijing, People's Republic of China</p> <p>Guan, Wenchi; National Clinical Research Center of Cardiovascular Diseases, State Key Laboratory of Cardiovascular Disease, Fuwai Hospital, National Center for Cardiovascular Diseases, Chinese Academy of Medical Sciences and Peking Union Medical College, Beijing, People's Republic of China</p> <p>Gao, Yan; National Clinical Research Center of Cardiovascular Diseases, State Key Laboratory of Cardiovascular Disease, Fuwai Hospital, National Center for Cardiovascular Diseases, Chinese Academy of Medical Sciences and Peking Union Medical College, Beijing, People's Republic of China</p> <p>Hu, Shuang; National Clinical Research Center of Cardiovascular</p> |



|                                 |                                                                                                                                                                                                                                                                                                                                                                                                                                                                                                                                                                                                                                                                                                                                                                                                                                                                                                                                |
|---------------------------------|--------------------------------------------------------------------------------------------------------------------------------------------------------------------------------------------------------------------------------------------------------------------------------------------------------------------------------------------------------------------------------------------------------------------------------------------------------------------------------------------------------------------------------------------------------------------------------------------------------------------------------------------------------------------------------------------------------------------------------------------------------------------------------------------------------------------------------------------------------------------------------------------------------------------------------|
|                                 | Diseases, State Key Laboratory of Cardiovascular Disease, Fuwai Hospital, National Center for Cardiovascular Diseases, Chinese Academy of Medical Sciences and Peking Union Medical College, Beijing, People's Republic of China<br>Bai, Xueke; National Clinical Research Center of Cardiovascular Diseases, State Key Laboratory of Cardiovascular Disease, Fuwai Hospital, National Center for Cardiovascular Diseases, Chinese Academy of Medical Sciences and Peking Union Medical College, Beijing, People's Republic of China<br>Krumholz, Harlan; Yale-New Haven Hospital Center for Outcomes Research and Evaluation,<br>Li, Xi; National Clinical Research Center of Cardiovascular Diseases, State Key Laboratory of Cardiovascular Disease, Fuwai Hospital, National Center for Cardiovascular Diseases, Chinese Academy of Medical Sciences and Peking Union Medical College, Beijing, People's Republic of China |
| <b>Primary Subject Heading</b>: | Cardiovascular medicine                                                                                                                                                                                                                                                                                                                                                                                                                                                                                                                                                                                                                                                                                                                                                                                                                                                                                                        |
| Secondary Subject Heading:      | Cardiovascular medicine                                                                                                                                                                                                                                                                                                                                                                                                                                                                                                                                                                                                                                                                                                                                                                                                                                                                                                        |
| Keywords:                       | acute myocardial infarction, Magnesium Sulfate, quality of health care                                                                                                                                                                                                                                                                                                                                                                                                                                                                                                                                                                                                                                                                                                                                                                                                                                                         |
|                                 |                                                                                                                                                                                                                                                                                                                                                                                                                                                                                                                                                                                                                                                                                                                                                                                                                                                                                                                                |

SCHOLARONE™  
Manuscripts

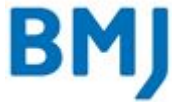

I, the Submitting Author has the right to grant and does grant on behalf of all authors of the Work (as defined in the below author licence), an exclusive licence and/or a non-exclusive licence for contributions from authors who are: i) UK Crown employees; ii) where BMJ has agreed a CC-BY licence shall apply, and/or iii) in accordance with the terms applicable for US Federal Government officers or employees acting as part of their official duties; on a worldwide, perpetual, irrevocable, royalty-free basis to BMJ Publishing Group Ltd ("BMJ") its licensees and where the relevant Journal is co-owned by BMJ to the co-owners of the Journal, to publish the Work in this journal and any other BMJ products and to exploit all rights, as set out in our [licence](#).

The Submitting Author accepts and understands that any supply made under these terms is made by BMJ to the Submitting Author unless you are acting as an employee on behalf of your employer or a postgraduate student of an affiliated institution which is paying any applicable article publishing charge ("APC") for Open Access articles. Where the Submitting Author wishes to make the Work available on an Open Access basis (and intends to pay the relevant APC), the terms of reuse of such Open Access shall be governed by a Creative Commons licence – details of these licences and which [Creative Commons](#) licence will apply to this Work are set out in our licence referred to above.

Other than as permitted in any relevant BMJ Author's Self Archiving Policies, I confirm this Work has not been accepted for publication elsewhere, is not being considered for publication elsewhere and does not duplicate material already published. I confirm all authors consent to publication of this Work and authorise the granting of this licence.

1  
2  
3 **1 Use of Intravenous Magnesium Sulfate among Patients with Acute Myocardial**  
4 **2 Infarction in China from 2001 to 2015: China PEACE-Retrospective AMI Study**

5  
6  
7  
8  
9  
10 **4 Running head: Magnesium Sulfate for AMI in China**

11  
12  
13  
14  
15  
16  
17  
18  
19  
20  
21  
22  
23  
24  
25  
26  
27  
28  
29  
30  
31  
32  
33  
34  
35  
36  
37  
38  
39  
40  
41  
42  
43  
44  
45  
46  
47  
48  
49  
50  
51  
52  
53  
54  
55  
56  
57  
58  
59  
60  
6  
Xianqiang Wang\*, MD; Xue Du\*, MD; Hao Yang; Emily Bucholz, MD PhD; Nicholas  
7  
Downing, MD; John A. Spertus, MD, MPH; Frederick A Masoudi, MD, MSPH; Jing Li,  
8  
MD, PhD; Wenchi Guan, MD; Yan Gao; Shuang Hu, PhD; Xueke Bai, MS; Harlan M.  
9  
Krumholz#, MD SM; Xi Li#, PhD; for the China PEACE Collaborative Group (see  
10  
Appendix)

11  
12 \* Contribute equally

13 # Co-senior authors

14  
15 National Clinical Research Center of Cardiovascular Diseases, State Key Laboratory  
16 of Cardiovascular Disease (XW, XD, HY, JL, WG, YG, SH, XB, XL), Fuwai Hospital,  
17 National Center for Cardiovascular Diseases, Chinese Academy of Medical Sciences  
18 and Peking Union Medical College, Beijing, People's Republic of China;  
19 Saint Luke's Mid America Heart Institute and the University of Missouri-Kansas City  
20 (JAS), Kansas City, Missouri, United States;  
21 Division of Cardiology (FAM), University of Colorado Anschutz Medical Campus,  
22 Aurora, Colorado, United States;  
23 Center for Outcomes Research and Evaluation (HMK, EB, ND), Yale-New Haven  
24 Hospital, New Haven, Connecticut, United States; Section of Cardiovascular  
25 Medicine (HMK), Robert Wood Johnson Clinical Scholars Program (HMK),  
26 Department of Internal Medicine, Yale University School of Medicine, New Haven,  
27 Connecticut, United States; Department of Health Policy and Management (HMK),  
28 Yale School of Public Health, New Haven, Connecticut, United States.

1  
2  
3 1 **Correspondence:** Dr Xi Li, National Clinical Research Center of Cardiovascular  
4  
5 2 Diseases, Fuwai Hospital, 167 Beilishi Road, Beijing 100037, People's Republic of  
6  
7 3 China; Tel: +86 10 8839 6203; Fax: +86 10 8836 5201;  
8  
9 4 Email: academic\_event@163.com  
10  
11  
12 5  
13  
14  
15  
16  
17  
18  
19  
20  
21  
22  
23  
24  
25  
26  
27  
28  
29  
30  
31  
32  
33  
34  
35  
36  
37  
38  
39  
40  
41  
42  
43  
44  
45  
46  
47  
48  
49  
50  
51  
52  
53  
54  
55  
56  
57  
58  
59  
60

For peer review only

## 1 **ABSTRACT**

### 2 ***Objective***

3 In 2001, Chinese guidelines for the care of acute myocardial infarction included a  
4 new recommendation against the routine use of magnesium. We studied temporal  
5 trends and institutional variation in the use of IV magnesium sulfate in nationally  
6 representative samples of individuals hospitalized with AMI in China between 2001-  
7 2015.

### 8 ***Methods***

9 In an observational study (China PEACE–Retrospective Study) of AMI care, we used  
10 a 2-stage, random sampling strategy to create a nationally representative sample of  
11 28,208 patients with AMI at 162 Chinese hospitals in 2001, 2006, 2011, and 2015.  
12 The main outcome is use of IV magnesium sulfate over time.

### 13 ***Results***

14 We identified 24,418 patients admitted for AMI, without hypokalemia, in the four  
15 study years. Over time, there was a significant initial decrease in IV magnesium  
16 sulfate use, from 32.1% in 2001 to 17.1% in 2015 ( $p < .001$  for trend). The decline  
17 was greater in the Eastern (from 33.3% to 16.5%) and Western (from 34.8% to  
18 17.2%) regions, as compared with the Central region (from 25.9% to 18.1%), with  
19 little difference between rural and urban areas. The proportion of hospitals using IV  
20 magnesium sulfate did not change over time (from 81.3% to 77.9%). The median  
21 odds ratios, representing hospital-level variation, were 6.03 in 2001, 3.86 in 2006,  
22 4.26 in 2011, and 4.72 in 2015. IV magnesium sulfate use was associated with  
23 cardiac arrest at admission and receipt of reperfusion therapy, but no hospital-  
24 specific characteristics.

### 25 ***Conclusions***

26 Despite recommendations against its use, IV magnesium sulfate is used in about 1 in  
27 6 patients with AMI in China. Our findings highlight the need for more efficient  
28 mechanisms to stop using ineffective therapies to improve patients' outcomes and  
29

1 reduce medical waste.

2

3

#### 4 ***Clinical Trial Registration***

5 URL: <https://www.clinicaltrials.gov>. Unique identifier: NCT01624883

#### 6 ***Keywords***

7 acute myocardial infarction, Magnesium Sulfate, quality of health care

8

9

#### 10 **Strengths and limitations of this study**

- 11 • This is the first large nationally representative registry demonstrating IV  
12 magnesium sulfate is still used in about 1 in 6 patients with AMI in China,  
13 despite recommendations against its use since 2000s.
- 14 • The study assessed the 15-year trend in the use of IV magnesium sulfate  
15 among patient with AMI in China.
- 16 • The study firstly reported both patients- and hospital-level resulted in the use  
17 of IV magnesium sulfate use, which could provide more targeted information  
18 for efficient mechanisms to stop using this ineffective therapy.
- 19 • The study adopted standardized procedures for abstraction of medical  
20 records that ensure the reliability of our results in describing the use pattern  
21 of magnesium sulfate in the real world.
- 22 • The very low prevalence of patients with some indications, such as  
23 magnesium sulfate deficiency would have little influence on the reliability of  
24 the results.

25

## 1 INTRODUCTION

2 The history of intravenous (IV) magnesium sulfate use for acute myocardial infarction  
3 (AMI) is convoluted. Once lauded in small, early trials as safe and highly effective,<sup>1-3</sup>  
4 it was later demonstrated to be ineffective, and even harmful, in two large clinical  
5 trials (MAGIC and ISIS-4) and in a subsequent meta-analysis.<sup>4,5</sup> Beginning in the  
6 early 2000s, AMI practice guidelines in the United States have specifically  
7 recommended against its routine use (Class III, level of evidence: C).<sup>6,7</sup> Similarly,  
8 China published guidelines in 2001 recommending against the use of IV magnesium  
9 sulfate in patients with AMI, except in the setting of hypomagnesemia or polymorphic  
10 ventricular tachycardia.<sup>8</sup>

11  
12 Although several studies have evaluated the introduction and uptake of new  
13 therapies,<sup>9-11</sup> few have examined de-adoption of ineffective therapy in clinical  
14 practice.<sup>12-14</sup> The de-adoption of therapy is particularly important because the  
15 situation may involve greater resistance and barriers to discontinuing long-standing  
16 practices than simply introducing new and promising therapies into practice.<sup>15</sup>  
17 Characterizing the use of magnesium sulfate for AMI in clinical practice offers an  
18 opportunity to assess the speed with which providers stop using a therapy when new  
19 evidence has overturned prior dogma.

20  
21 Accordingly, our objectives were to assess the trends and variation of regional and  
22 hospital-level use of IV magnesium sulfate among patient with AMI using data from  
23 the China PEACE Retrospective AMI Study between 2001 and 2015. These data,  
24 from a nationally representative network of hospitals throughout China, provided a  
25 unique opportunity to examine the trend for discontinuing routine IV magnesium  
26 sulfate over time and to describe the variations across hospitals in its discontinuation.

27  
28

## 1       2       3       4       5       6       7       8       9       10       11       12       13       14       15       16       17       18       19       20       21       22       23       24       25       26       27       28       29       30       31       32       33       34       35       36       37       38       39       40       41       42       43       44       45       46       47       48       49       50       51       52       53       54       55       56       57       58       59       60

### 1       2       3       4       5       6       7       8       9       10       11       12       13       14       15       16       17       18       19       20       21       22       23       24       25       26       27       28       29       30       31       32       33       34       35       36       37       38       39       40       41       42       43       44       45       46       47       48       49       50       51       52       53       54       55       56       57       58       59       60

1       2       3       4       5       6       7       8       9       10       11       12       13       14       15       16       17       18       19       20       21       22       23       24       25       26       27       28       29       30       31       32       33       34       35       36       37       38       39       40       41       42       43       44       45       46       47       48       49       50       51       52       53       54       55       56       57       58       59       60

The design and methods of the China PEACE-Retrospective AMI Study have been previously published.<sup>16</sup> In addition to a nationally representative sample of patients admitted for AMI in China during 2001, 2006, and 2011 created in the China PEACE-Retrospective AMI Study, we also included a more recent sample of patients admitted in 2015 using the same two-stage random sampling process. Briefly, in the first stage, we identified hospitals using a simple random sampling procedure within 5 economic-geographic regions: Eastern rural, Central rural, Western rural, Eastern urban, and Central/Western urban. We stratified on both location and urban-rural classifications because economic development and clinical capacities differed across these categories. We sampled representative hospitals from 2011 to reflect current practices and used the same hospitals for the 2006, 2001, and 2015 so as to describe temporal trends. In the second stage, we sampled AMI cases from hospital databases in 2001, 2006, 2011, and 2015 using random sampling procedures.

17       18       19       20       21       22       23       24       25       26       27       28       29       30       31       32       33       34       35       36       37       38       39       40       41       42       43       44       45       46       47       48       49       50       51       52       53       54       55       56       57       58       59       60

Trained personnel at the national coordinating centers abstracted data from the medical records using standardized data definitions. Data abstraction quality was rigorously monitored by randomly auditing 5% of the medical records, in a process that ensured that the overall variable accuracy exceeded 98%.<sup>16</sup> We also obtained information on the organizational learning culture of hospital in 2013 through questionnaires completed by the director and a physician of the Cardiology Department in each participating hospital (see Appendix).<sup>17</sup>

25       26       27       28       29       30       31       32       33       34       35       36       37       38       39       40       41       42       43       44       45       46       47       48       49       50       51       52       53       54       55       56       57       58       59       60

The Ethics Committee at the National Center for Cardiovascular Diseases approved the study. All collaborating hospitals either accepted central ethics approval or obtained local ethics approval by their ethics committees. Given the retrospective nature of the data and the lack of personal identifiers, patient-level consent was not



1 required. The study was registered with ClinicalTrials.gov (NCT01624883).

2

### 3 **Study Sample**

4 Among the randomly sampled patients hospitalized for AMI in 2001, 2006, 2011, and  
5 2015, only patients with a definite discharge diagnosis of AMI were included. We  
6 were unable to exclude patients with hypomagnesemia, because magnesium levels  
7 were not collected. However, we excluded patients with chart-documented  
8 hypokalemia during their hospitalization, which could also represent an indication for  
9 magnesium repletion. In hospital-level analysis, only hospitals with 10 or more cases  
10 in a study year were included.

11

### 12 **Variables**

13 Receipt of IV magnesium sulfate was ascertained from the medical record. Patient-  
14 level characteristics abstracted from the medical records included demographics  
15 (age, gender), medical history (hypertension, diabetes, dyslipidemia, current  
16 smoking, and history of myocardial infarction, coronary heart disease, ischemic  
17 stroke, coronary artery bypass grafting (CABG), or primary coronary intervention  
18 (PCI)), clinical presentation (chest discomfort, heart rate, systolic blood pressure on  
19 admission, and left bundle branch block on electrocardiogram), as well as in-hospital  
20 complications (cardiac arrest, cardiogenic shock, and acute stroke) and year of  
21 hospitalization (2001, 2006, 2011, 2015). The outcomes included: 1) in-hospital  
22 mortality or withdrawal from treatment due to a terminal status at discharge; and 2)  
23 in-hospital composite of major complications (including death, withdrawal from  
24 treatment, re-infarction, shock, ischemic stroke, or congestive heart failure  
25 (Appendix). Hospital characteristics included teaching status, PCI capability,  
26 economic geographic regions, and urban or rural location.

27

28 Organizational learning culture was measured with Learning Organization Survey

1 (LOS-27, an abbreviated version of the original Garvin et al. Learning Organization  
2 Survey).<sup>18</sup> The LOS-27 consists of 27 questions, grouped into 7 domains of  
3 organizational learning characteristics, including supportive learning environment,  
4 time for reflection, leadership that reinforces learning, experimentation, training,  
5 knowledge acquisition, and performance monitoring.

### 6 **Statistical analysis**

7 To examine the trends at both the population and hospital levels across different  
8 study periods, p-values for trends were reported using the Cochran–Armitage test.

9 We described the hospital-level distribution of the IV magnesium sulfate use among  
10 the hospitals with at least 10 patients with AMI in the study years. To further  
11 understand the hospital-level variation in IV magnesium sulfate use, we quantified  
12 inter-hospital variation using the median odds ratio (MOR), by constructing  
13 generalized estimating equations in 2001, 2006, 2011, and 2015, respectively. MOR  
14 represents the average (median) OR for receiving IV magnesium sulfate for 2 AMI  
15 patients with similar clinical characteristics admitted to 2 randomly selected hospitals.

16 To understand the most current pattern in IV magnesium sulfate use, we constructed  
17 multivariable models using the data from 2015, which also adopted generalized  
18 estimating equations to account for the clustering of patients within hospitals. Factors  
19 were selected based on clinical judgment and literature review,<sup>10,11</sup> including patient  
20 and hospital characteristics. All covariates showed in Table 1, except those with  
21 frequencies below 1%, were included in the multivariable model. We transformed  
22 continuous variables (e.g. age and heart rate) into categorical variables using  
23 clinically meaningful cut-off values, and then created dummy variables. From the  
24 multivariable model in 2015, we then computed risk-standardized rates for each  
25 hospital separately. The risk-standardized rate was calculated as the ratio of  
26 observed to predicted outcomes, multiplied by the overall unadjusted rate, a form of

1 indirect standardization. Regarding the different dosage of IV magnesium sulfate, we  
2 conducted a sensitivity analysis to compare patients receiving multiple doses to  
3 those receiving a single dose of or no IV magnesium sulfate.

4  
5 To compare the outcomes between patients with and without IV magnesium sulfate,  
6 we applied propensity score matching to adjust differences in observed  
7 characteristics between them. We obtained the log odds of the probability that  
8 patients received IV magnesium sulfate with modeling a function of all the variables  
9 in Table 1. Then we performed a one-to-one no replacement match between the two  
10 groups based on the estimated propensity score. The no IV magnesium sulfate  
11 patients was matched if patient had the closest score with a randomly selected IV  
12 magnesium sulfate patient, and were considered eligible to match if the estimated  
13 logit within 0.6 standard deviation of the selected IV magnesium sulfate patient. This  
14 matching interval has been shown to eliminate approximately 90% of the bias in  
15 observed confounders (Appendix).<sup>19</sup>

16  
17 For the questionnaire with LOS-27 (Appendix), we analyzed the responses at the  
18 hospital level by calculating the average of the 2 responses to each question.  
19 Responses were categorized as positive if they were  $\geq 5$  on a 7-point scale or  $\geq 4$  on a  
20 5-point scale. We then calculated the positive response rate at each hospital as the  
21 proportion of questions that had a positive response by the hospital, and  
22 demonstrated the correlations between positive response rate and risk-standardize  
23 rate of IV magnesium sulfate use in 2015, as well as the reduction in IV magnesium  
24 sulfate use from 2011 to 2015.

25  
26 All comparisons were two-sided, with statistical significance defined as p less  
27 than .05. Statistical analysis was done with SAS software, version 9.4, and R  
28 software, version 3.3.1.

1  
2  
3 1  
45 2 ***Patient and Public Involvement statement***6  
7 3 Patients or public were not involved in the development of the study protocol.  
8  
9 410  
11 5 **RESULTS**12  
13 6 ***Study population***

14  
15 7 We identified 28,208 patients with AMI in 2001, 2006, 2011 and 2015 admitted to  
16  
17 8 162 hospitals. After excluding patients with hypokalemia (<3.5 mmol/L, n= 3,790),  
18  
19 9 24,418 patients remained, including 2,073 in 2001, 3,888 in 2006, 8,117 in 2011 and  
20  
21 10 10,340 in 2015 (**Figure 1**). Almost half (41.2%) of the patients were hospitalized in  
22  
23 11 rural areas. In the study population, the average age was  $65.1 \pm 12.7$  years, 29.7%  
24  
25 12 were female, almost three quarters had at least one cardiac risk factors  
26  
27 13 (hypertension, diabetes, dyslipidemia or smoking), and about 10% had has a prior  
28  
29 14 myocardial infarction or ischemic stroke (**Table 1**).  
30  
31  
32  
33  
34

35 16 ***Temporal trends and regional variations in IV magnesium sulfate use***

36  
37 17 Over time, there was a significant initial decrease in the use of IV magnesium sulfate,  
38  
39 18 from 32.1% (665) in 2001 to 18.4% (715) in 2006, 15.4% (1,251) in 2011 and 17.1%  
40  
41 19 (1,763) in 2015 ( $p < .001$  for trend) (**Figure 2**). There was significant variation in the  
42  
43 20 temporal trends of use of IV magnesium sulfate across the five strata ( $p < .001$  for  
44  
45 21 interaction). In general, the decline was greater in the Eastern region [16.8% (from  
46  
47 22 33.3% in 2001 to 16.5% in 2015),  $p < .001$ ] and Western region [16.6% (from 34.8%  
48  
49 23 in 2001 to 17.2% in 2015),  $p < .001$ ], compared with the Central regions [7.8% (from  
50  
51 24 25.9% in 2001 to 18.1% in 2015),  $p < .001$ ]. There was a more modest difference  
52  
53 25 between rural areas [16.3% (from 31.6% to 15.3%),  $p < .001$ ] than in urban areas  
54  
55 26 [13.9% (from 32.4% to 18.5%),  $p < .001$ ]. No significant association was found  
56  
57 27 between the positive response rate of LOS-27 in 2013 and the hospital-level  
58  
59  
60

1 reduction in IV magnesium sulfate use from 2011 to 2015 ( $R^2=0.011$ ,  $p= .237$ )  
2 (Appendix).

3

#### 4 ***Hospital-level distributions in IV magnesium sulfate use***

5 We examined hospital-level rates of IV magnesium sulfate use among hospitals with  
6 10 or more cases per year, and observed a downward trend in the median, from  
7 17.4% in 2001, 9.1% in 2006, 8.0% in 2011 to 10.7% in 2015 (**Figure 3**). However,  
8 the proportion of hospitals still using magnesium sulfate were 81.3% in 2001, 84.8%  
9 in 2006, 76.6% in 2011, and 77.9% in 2015, with no significant decline ( $p$  for trend  
10 = .26). Even in 2015, a quarter of hospitals had rates of IV magnesium sulfate use  
11 exceeding 25%. The MORs (95% CI) of each year characterized similar degrees of  
12 hospital-level variation (6.03 (3.93-8.52) in 2001, 3.86 (3.00-4.77) in 2006, 4.26  
13 (3.38-5.20) in 2011, and 4.72 (3.70-5.83) in 2015).

14

#### 15 ***Patient and hospital characteristics associated with IV magnesium sulfate use***

16 In univariate analysis, patients receiving IV magnesium sulfate were more likely to  
17 not have diabetes, dyslipidemia or a prior revascularization, were more likely to have  
18 had a prior ischemic stroke or cardiac arrest at presentation. They were more likely  
19 to receive reperfusion therapy, be at urban hospital, or be in Central or Western  
20 regions (**Table 1**). In the multivariable model, presence of cardiac arrest at admission  
21 (OR 3.38, 95% CI 2.50-5.82,  $P< .001$ ), receipt of aspirin within 24h (1.43(1.22-1.67),  
22 statin use (1.33(1.13-1.57), reperfusion therapy (1.67 (1.35-1.90) for fibrinolytic  
23 therapy, 1.69 (1.44-1.98) for primary PCI, both  $P< .0001$ ), and onset of heart failure  
24 (OR 1.69, 95% CI 1.34-2.09,  $P< .001$ ) were positively associated with IV magnesium  
25 sulfate use (Appendix). No significant difference was identified across the teaching  
26 status, economic geographic region and rural/urban of hospitals (**Table 1**). The risk-  
27 standardized rate of IV magnesium sulfate use in 2015 was not associated with the  
28 positive response rate of LOS-27 ( $R^2=0.027$ ,  $p= .04$ ) (Appendix).

### 1 ***In-hospital outcomes of patients with and without IV magnesium sulfate use***

2 In the patients treated with IV magnesium sulfate, the crude rates of in-hospital death  
3 (7.5% vs. 6.4%) (**Figure 4**), in-hospital death or treatment withdraw (10.8% vs.  
4 9.5%), and in-hospital composite of major complications (22.0% vs. 17.6%) were  
5 higher than patients without IV magnesium sulfate therapy ( $P < .01$  for all). After  
6 adjusted for hospital characteristics, patient risk profiles, medication and reperfusion  
7 therapies, using propensity score matching, the in-hospital death rates were not  
8 significantly different between the treated and non-treated patients (OR 1.13, 95% CI  
9 0.96-1.33,  $P = .15$ ). However, the patients treated with IV magnesium sulfate had still  
10 higher risk for in- hospital death (OR 1.18, 95% CI 1.03-1.36,  $P = .01$ ), in-hospital  
11 death or treatment withdraw (OR 1.24, 95% CI 1.09-1.41,  $P = .001$ ), and in- hospital  
12 composite of major complications (OR 1.32, 95% CI 1.19-1.47,  $P < .001$ ).

### 14 **Different Dose of IV magnesium sulfate**

15 We hypothesized that that magnesium sulfate prescribed more than once was more  
16 likely to be a routine administration than the single dose that is commonly used for  
17 repletion or arrhythmias. Thus, we conducted a sensitivity analysis focusing on  
18 multiple doses. The sensitivity analysis showed that there was also a significant  
19 decrease in the multiple doses of IV magnesium sulfate, from 28.9% in 2001 to  
20 14.5% in 2006, 10.9% in 2011 and 11.31% in 2015 ( $p < .001$  for trend). Nearly  
21 identical predictors of IV magnesium sulfate use were found when we compared  
22 patients receiving multiple doses to those without IV magnesium sulfate (Appendix).

### 24 **DISCUSSION**

25 In this large nationally representative study, we found that despite an initial decline in  
26 the use of IV magnesium sulfate for patients with AMI in China after 2001, about 1 in  
27 6 patients continued to be treated with it through 2015. Furthermore, there was  
28 substantial variation in the use of IV magnesium sulfate use across hospitals. No

1 hospital characteristics were associated with IV magnesium sulfate use after  
2 adjusting for patient factors, including cardiac arrest and use of reperfusion therapy  
3 during hospitalization.

4  
5 Our study is the first, to our knowledge, to characterize the rate of de-adoption of  
6 magnesium sulfate in patients with AMI in China. The only real-world study on the  
7 use of magnesium sulfate to treat AMI, which was based on data from the National  
8 Registry of Myocardial Infarction (NRFMI-2) in the United States, found that the use  
9 rate of magnesium sulfate in patients within first 24 hours after AMI was 5.1% in  
10 2001 – 5 years after the US guideline recommended against the use of magnesium  
11 sulfate.<sup>20</sup> Questionnaire for chief cardiologist from 2500 hospital in China in 1998  
12 revealed that 47% of physician would prescribe magnesium sulfate for patients with  
13 AMI.<sup>21</sup> In contrast in 2015, three-fold more Chinese patients with AMI were receiving  
14 magnesium sulfate. This is congruent with a survey among cardiologists in 2012,  
15 where over one fifth reported that they were routinely using magnesium sulfate in  
16 patients with ACS.<sup>22</sup>

17  
18 Several patient characteristics were identified to be associated with the use of IV  
19 magnesium sulfate for AMI. It was plausible that the presence of cardiac arrest or  
20 reperfusion therapy may spur some physicians to use magnesium sulfate to prevent  
21 arrhythmias, according to prior studies in both China and other countries.<sup>1 6 23-26</sup>  
22 These explanations, even though not recommended by the guidelines, highlighted  
23 the gaps in physicians' practice and highlights the needs for targeted education in the  
24 future.

25  
26 The hospital-level and regional variations in IV magnesium sulfate highlights the  
27 marked variability with which different hospitals adopted new evidence about the lack  
28 of benefit from IV magnesium sulfate use. On the one hand, magnesium sulfate use



1 in 2015 was neither associated with hospital-specific characteristics, nor different  
2 across geographic or socio-economic regions. The teaching status or tertiary level  
3 did not translate into the better performance in this measure, which underscores the  
4 widespread need for continued education and evaluation of clinical practice. On the  
5 other hand, the regional variation in de-adoption of magnesium sulfate during the 15-  
6 year period seemed not directly related to the regional socio-economic development  
7 status that might be assumed to affect the resources available for acquiring and  
8 implementing guideline recommendation. Moreover, no evidence connects  
9 organizational learning culture with high performance, even much has been observed  
10 in studies of US hospitals.<sup>27</sup> Given our findings, more research is needed to better  
11 understand current practice patterns that cause some hospitals to still use ineffective  
12 therapies.

13  
14 Our findings raise several questions about the dissemination and implementation of  
15 evidence and guidelines in China, particularly regarding education for physicians  
16 when long-standing therapies are demonstrated to be non-beneficial, and need to be  
17 de-adopted. We hypothesized that several factors may explain why the rate of  
18 magnesium sulfate use has remained relatively high in China. First, few actions have  
19 been taken to disseminate guidelines – after China published the guideline against IV  
20 magnesium sulfate for AMI in 2001,<sup>8</sup> the textbook used in all Chinese medical  
21 colleges had not stopped recommending IV magnesium sulfate use in patients with  
22 AMI until 2009.<sup>28</sup> Second, China's hospital system is short for mechanisms to  
23 facilitate the implementation of guideline recommendations, and systematic  
24 approaches for monitoring the performance of hospitals and physicians in following  
25 the guidelines are lacking in China.<sup>29</sup>

26  
27 The successful de-adoption of non-beneficial or potentially harmful therapies for  
28 corresponding disease, which could reduce costs and potentially prevent



1 complications, requires more than increased efforts from the part of guideline  
2 developers.<sup>12</sup> After the dissemination of the guideline, more complicated issues need  
3 to be addressed, including how to develop tools reminding and alerting physicians  
4 when non-recommended therapies are ordered, how to establish a system to report  
5 feedback periodically on the appropriateness of treatment by practitioners and  
6 hospitals, how to design an accountability-oriented mechanism to prohibit ineffective  
7 regimen being prescribed, etc.<sup>30</sup> These issues could only be properly addressed  
8 through collaborations with researchers, educators, policymakers and other  
9 stakeholders.<sup>31 32</sup>

10  
11 This study has several limitations that warrant consideration. First, we could not  
12 exclude patients with some indications, such as hypomagnesaemia and episodes of  
13 Torsade de pointes. However, we estimate that the influence is relatively small given  
14 low prevalence of these conditions previously reported.<sup>33 34</sup> Second, we did not have  
15 the ability to prospectively ask clinicians why they were prescribing IV magnesium  
16 sulfate, which limited our capability to gain better understanding of the use pattern  
17 and influencing factors. Third, our data were acquired retrospectively through  
18 medical record abstraction. Thus, the quality of our data depends on the accuracy  
19 and completeness of prior documentation and abstraction. Nevertheless, the  
20 standardized procedures for abstraction of medical records ensure the reliability of  
21 our results in describing the use pattern of magnesium sulfate in the real world. Also,  
22 we analyzed the data at the hospital level and were not able to determine whether  
23 the observed patterns were due to only a few physicians, or were common  
24 throughout a hospital's staff. Finally, residual confounding of measured or  
25 unmeasured variables might affect the observed results about in-hospital outcomes  
26 of patients with and without IV magnesium sulfate use.

27  
28 In conclusion, the de-adoption of magnesium sulfate for patients with AMI is

1 suboptimal, moreover, the decrease of rate was slowing down recently, steady at an  
2 unacceptably high level. Our findings highlight the need for more efficient  
3 mechanisms to translate evidence-based therapies into clinical practice in China to  
4 improve patients' outcomes and reduce medical waste.

## 6 **ACKNOWLEDGMENTS**

7 We appreciate the multiple contributions made by study teams at National Clinical  
8 Research Center of Cardiovascular Diseases and Yale-New Haven Hospital Center  
9 for Outcomes Research and Evaluation in study design and operations, particularly  
10 the data collection by Yi Pi, Jiamin Liu, Wuhanbilige Hundei, Haibo Zhang, Lihua  
11 Zhang, Wenchi Guan, Xiaofang Yan, Yuan Yu, Xiqian Huo, Xin Zheng, and Yuanlin  
12 Guo. We appreciate the editing by Aoxi Tian. We are grateful for the support  
13 provided by the Chinese government.

## 15 **CONTRIBUTORS**

16 XL, JL and HMK conceived the China PEACE study and take responsibility for all  
17 aspects of it. XW, XD, JL, FAM, JAS, JL, HMK and XL designed the study. XW and  
18 XD wrote the first draft of the article, with further contributions from HY, EB, ND, JAS,  
19 FAM, JL, WG, HMK and XL. SH, YG and XB did statistical analysis. XL had full  
20 access to all the data in the study and take responsibility for the integrity of the data  
21 and the accuracy of the data analysis. All authors interpreted data and approved the  
22 final version of the article.

## 24 **DISCLOSURES**

25 There are no relevant conflicts of interest.

## 27 **FUNDING**

28 This project was partly supported by the National Key Research and Development

1  
2  
3 1 Program (2017YFC1310803, 2017YFC1310801, 2015BAI12B01) from the Ministry  
4  
5 2 of Science and Technology of China, the Major Public Health Service Project from  
6  
7 3 the Ministry of Finance and National Health and Family Planning Commission of  
8  
9 4 China, the 111 Project from the Ministry of Education of China (B16005). Dr.  
10  
11 5 Krumholz is supported by grant U01 HL105270-05 (Center for Cardiovascular  
12  
13 6 Outcomes Research at Yale University). The sponsors had no role in the conduct of  
14  
15 7 the study; in the collection, management, analysis, and interpretation of the data; or  
16  
17 8 in the preparation or approval of the manuscript.  
18  
19  
20  
21  
22  
23  
24

## 25 10 DATA SHARING STATEMENT

26 11 Extra data is available by emailing [xi.li@fwoxford.org](mailto:xi.li@fwoxford.org).  
27  
28  
29  
30  
31  
32  
33

## 34 15 REFERENCE

- 35 16 1. Horner SM. Efficacy of intravenous magnesium in acute myocardial infarction  
36 17 in reducing arrhythmias and mortality. Meta-analysis of magnesium in  
37 18 acute myocardial infarction. *Circulation* 1992;**86**(3):774-9.  
38  
39 19 2. Teo KK, Yusuf S, Collins R, et al. Effects of intravenous magnesium in suspected  
40 20 acute myocardial infarction: overview of randomised trials. *BMJ* (Clinical  
41 21 research ed) 1991;**303**(6816):1499-503.  
42  
43 22 3. Thogersen AM, Johnson O, Wester PO. Effects of magnesium infusion on  
44 23 thrombolytic and non-thrombolytic treated patients with acute  
45 24 myocardial infarction. *International journal of cardiology* 1993;**39**(1):13-  
46 25 22.  
47  
48 26 4. ISIS-4: a randomised factorial trial assessing early oral captopril, oral  
49 27 mononitrate, and intravenous magnesium sulphate in 58,050 patients  
50 28 with suspected acute myocardial infarction. ISIS-4 (Fourth International  
51 29 Study of Infarct Survival) Collaborative Group. *Lancet*  
52 30 1995;**345**(8951):669-85.

- 1 5. Early administration of intravenous magnesium to high-risk patients with  
2 acute myocardial infarction in the Magnesium in Coronaries (MAGIC)  
3 Trial: a randomised controlled trial. *Lancet* 2002;**360**(9341):1189-96.
- 4 6. Antman EM, Anbe DT, Armstrong PW, et al. ACC/AHA guidelines for the  
5 management of patients with ST-elevation myocardial infarction--  
6 executive summary: a report of the American College of  
7 Cardiology/American Heart Association Task Force on Practice  
8 Guidelines (Writing Committee to Revise the 1999 Guidelines for the  
9 Management of Patients With Acute Myocardial Infarction). *Circulation*  
10 2004;**110**(5):588-636.
- 11 7. Ryan TJ, Anderson JL, Antman EM, et al. ACC/AHA guidelines for the  
12 management of patients with acute myocardial infarction. A report of the  
13 American College of Cardiology/American Heart Association Task Force  
14 on Practice Guidelines (Committee on Management of Acute Myocardial  
15 Infarction). *J Am Coll Cardiol* 1996;**28**(5):1328-428.
- 16 8. China Society of Cardiology of Chinese Medical Association EBoCJoC. Guideline  
17 for diagnosis and treatment of patients with acute myocardial infarction.  
18 *Chinese Circulation Journal* 2001;**16**(6):407-22.
- 19 9. Gambassi G, Forman DE, Lapane KL, et al. Management of heart failure among  
20 very old persons living in long-term care: has the voice of trials spread?  
21 The SAGE Study Group. *Am Heart J* 2000;**139**(1 Pt 1):85-93.
- 22 10. Kim N, Gross C, Curtis J, et al. The impact of clinical trials on the use of  
23 hormone replacement therapy. A population-based study. *Journal of*  
24 *general internal medicine* 2005;**20**(11):1026-31.
- 25 11. Stafford RS, Furberg CD, Finkelstein SN, et al. Impact of clinical trial results on  
26 national trends in alpha-blocker prescribing, 1996-2002. *Jama*  
27 2004;**291**(1):54-62.
- 28 12. Hauptman PJ, Schnitzler MA, Swindle J, et al. Use of nesiritide before and after  
29 publications suggesting drug-related risks in patients with acute  
30 decompensated heart failure. *Jama* 2006;**296**(15):1877-84.
- 31 13. Sauro K, Bagshaw SM, Niven D, et al. Barriers and facilitators to adopting high  
32 value practices and de-adopting low value practices in Canadian intensive  
33 care units: a multimethod study. *BMJ open* 2019;**9**(3):e024159.

- 1  
2  
3  
4 14. Niven DJ, McCormick TJ, Straus SE, et al. Identifying low-value clinical  
5  
6 practices in critical care medicine: protocol for a scoping review. *BMJ*  
7  
8 *open* 2015;**5**(10):e008244.
- 9  
10 15. Niven DJ, Rubenfeld GD, Kramer AA, et al. Effect of published scientific  
11  
12 evidence on glycemic control in adult intensive care units. *JAMA Intern*  
13  
14 *Med* 2015;**175**(5):801-9.
- 15  
16 16. Dharmarajan K, Li J, Li X, et al. The China Patient-Centered Evaluative  
17  
18 Assessment of Cardiac Events (China PEACE) retrospective study of acute  
19  
20 myocardial infarction: study design. *Circulation Cardiovascular quality*  
21  
22 *and outcomes* 2013;**6**(6):732-40.
- 23  
24 17. Yin ES, Downing NS, Li X, et al. Organizational culture in cardiovascular care  
25  
26 in Chinese hospitals: a descriptive cross-sectional study. *Bmc Health*  
27  
28 *Services Research* 2015;**15**(1):569.
- 29  
30 18. Singer SJ, Moore SC, Meterko M, et al. Development of a short-form Learning  
31  
32 Organization Survey: the LOS-27. *Med Care Res Rev* 2012;**69**(4):432-59.
- 33  
34 19. Xing SG, Rosenbaum PR. Comparison of Multivariate Matching Methods:  
35  
36 Structures, Distances, and Algorithms. *Journal of Computational &*  
37  
38 *Graphical Statistics* 1993;**2**(4):405-20.
- 39  
40 20. Ziegelstein RC, Hilbe JM, French WJ, et al. Magnesium use in the treatment of  
41  
42 acute myocardial infarction in the United States (observations from the  
43  
44 Second National Registry of Myocardial Infarction). *Am J Cardiol*  
45  
46 2001;**87**(1):7-10.
- 47  
48 21. LX. J, ZM. C, JX. X, et al. [Suvery of hospital of myocardial infarction in China].  
49  
50 *Linchuang XIn Xue Guan Bing Za Zhi*, 2002 (9):417-20.
- 51  
52 22. Yiping Chen LJ, Qiuli Zhang, Xiaoshuai Wei, Xi Li, Margaret Smith, Zhengming  
53  
54 Chen. Doctor-reported hospital management of acute coronary syndrome  
55  
56 in China: A nationwide survey of 1029 hospitals in 30 provinces. *World*  
57  
58 *Journal of Cardiovascular Diseases* 2012;**2**:168-76.
- 59  
60 23. Abraham AS, Rosenmann D, Kramer M, et al. Magnesium in the prevention of  
lethal arrhythmias in acute myocardial infarction. *Arch Intern Med*  
1987;**147**(4):753-5.
24. Rapaport E. Guidelines for the acute coronary syndromes. *Current cardiology*  
reports 2001;**3**(4):289-98.

- 1 25. Raghu C, Peddeswara Rao P, Seshagiri Rao D. Protective effect of intravenous  
2 magnesium in acute myocardial infarction following thrombolytic  
3 therapy. *Int J Cardiol* 1999;**71**(3):209-15.
- 4 26. Zhou H, Sun M. Suppression of thrombolysis-induced reperfusion arrhythmias  
5 in acute myocardial infarction by magnesium sulfate. *Journal of Clinical*  
6 *Cardiology* 2000;**16**(4):156-58.
- 7 27. Bradley EH, Curry LA, Spatz ES, et al. Hospital strategies for reducing risk-  
8 standardized mortality rates in acute myocardial infarction. *Ann Intern*  
9 *Med* 2012;**156**(9):618-26.
- 10 28. Lu Z, Zhong N. *Internal Medicine (The seventh edition)*. Beijing: People's  
11 Medical Publishing House, 2009.
- 12 29. Jiang L, Krumholz HM, Li X, et al. Achieving best outcomes for patients with  
13 cardiovascular disease in China by enhancing the quality of medical care  
14 and establishing a learning health-care system. *Lancet*  
15 2015;**386**(10002):1493-505.
- 16 30. Niven DJ, Mrklas KJ, Holodinsky JK, et al. Towards understanding the de-  
17 adoption of low-value clinical practices: a scoping review. *BMC medicine*  
18 2015;**13**:255.
- 19 31. Carrese JA, Malek J, Watson K, et al. The essential role of medical ethics  
20 education in achieving professionalism: the Romanell Report. *Academic*  
21 *medicine : journal of the Association of American Medical Colleges*  
22 2015;**90**(6):744-52.
- 23 32. Grimshaw J, Eccles M, Tetroe J. Implementing clinical guidelines: current  
24 evidence and future implications. *The Journal of continuing education in*  
25 *the health professions* 2004;**24 Suppl 1**:S31-7.
- 26 33. Kafka H, Langevin L, Armstrong PW. Serum magnesium and potassium in  
27 acute myocardial infarction. Influence on ventricular arrhythmias. *Arch*  
28 *Intern Med* 1987;**147**(3):465-9.
- 29 34. Romano TJ. Serum magnesium levels may not indicate low tissue magnesium  
30 levels. *Archives of internal medicine* 1997;**157**(4):460.

**Table 1. Baseline characteristics of using IV magnesium sulfate**

| Characteristics                                 | Overall     | Use N(%)   | Non-Use(%)  | P value |
|-------------------------------------------------|-------------|------------|-------------|---------|
| <b>Patient characteristics</b>                  |             |            |             |         |
| Age                                             |             |            |             | 0.234   |
| <55                                             | 5262(21.5)  | 938(21.3)  | 4324(21.6)  |         |
| 55-64                                           | 5821(23.8)  | 1072(24.4) | 4749(23.7)  |         |
| 65-74                                           | 6989(28.6)  | 1290(29.4) | 5699(28.5)  |         |
| >=75                                            | 6346(26.0)  | 1094(24.9) | 5252(26.2)  |         |
| Gender                                          |             |            |             | 0.144   |
| Female                                          | 7257(29.7)  | 1346(30.6) | 5911(29.5)  |         |
| Male                                            | 17161(70.3) | 3048(69.4) | 14113(70.5) |         |
| Hypertension                                    | 12551(51.4) | 2247(51.1) | 10304(51.5) | 0.7     |
| Diabetes                                        | 4758(19.5)  | 768(17.5)  | 3990(19.9)  | <.001   |
| Dyslipidemia                                    | 1588(6.5)   | 235(5.3)   | 1353(6.8)   | <.001   |
| Currently smoking                               | 8084(33.1)  | 1496(34.0) | 6588(32.9)  | 0.144   |
| Prior ischemic stroke                           | 2706(11.1)  | 546(12.4)  | 2160(10.8)  | 0.002   |
| Prior myocardial infarction                     | 2504(10.3)  | 416(9.5)   | 2088(10.4)  | 0.057   |
| Prior CABG/PCI                                  | 713(2.9)    | 104(2.4)   | 609(3.0)    | 0.016   |
| Chest discomfort                                | 22211(91)   | 4021(91.5) | 18190(90.8) | 0.161   |
| Left branch block at presentation               | 342(1.4)    | 65(1.5)    | 277(1.4)    | 0.624   |
| Cardiac arrest at presentation                  | 271(1.1)    | 81(1.8)    | 190(0.9)    | <.001   |
| Cardiogenic shock at presentation               | 1436(5.9)   | 279(6.3)   | 1157(5.8)   | 0.145   |
| Acute stroke at presentation                    | 530(2.2)    | 77(1.8)    | 453(2.3)    | 0.036   |
| Heart rate at presentation, bpm                 |             |            |             | 0.052   |
| <50                                             | 1019(4.2)   | 177(4)     | 842(4.2)    |         |
| 50-110                                          | 21760(89.1) | 3886(88.4) | 17874(89.3) |         |
| >110                                            | 1639(6.7)   | 331(7.5)   | 1308(6.5)   |         |
| SBP at presentation, mmHg                       |             |            |             | 0.004   |
| <120                                            | 8181(33.5)  | 1565(35.6) | 6616(33.0)  |         |
| 120-139                                         | 7534(30.9)  | 1299(29.6) | 6235(31.1)  |         |
| 140-159                                         | 5041(20.6)  | 913(20.8)  | 4128(20.6)  |         |
| >=160                                           | 3662(15.0)  | 617(14.0)  | 3045(15.2)  |         |
| New onset of heart failure                      | 2506(10.3)  | 569(12.9)  | 1937(9.7)   | <0.001  |
| Medication within 24-hour                       |             |            |             |         |
| Aspirin                                         | 13742(56.3) | 2688(61.2) | 11054(55.2) | <0.001  |
| ACE inhibitors or angiotensin receptor blockers | 13662(56)   | 2541(57.8) | 11121(55.5) | 0.006   |
| β-blockers                                      | 10051(41.2) | 1768(40.2) | 8283(41.4)  | 0.169   |
| Clopidogrel                                     | 10572(43.3) | 1845(42)   | 8727(43.6)  | 0.054   |
| Statins                                         | 13031(53.4) | 2398(54.6) | 10633(53.1) | 0.076   |
| Reperfusion therapies                           |             |            |             | <.001   |
| No reperfusion                                  | 18720(76.7) | 3130(71.2) | 15590(77.9) |         |
| Fibrinolytic therapy                            | 3136(12.8)  | 746(17.0)  | 2390(11.9)  |         |
| Primary PCI                                     | 2562(10.5)  | 518(11.8)  | 2044(10.2)  |         |
| <b>Hospital characteristics</b>                 |             |            |             |         |
| Teaching hospital                               | 19081(78.1) | 3462(78.8) | 15619(78.0) | 0.252   |
| PCI-capable hospital                            | 15876(65.0) | 2768(63.0) | 13108(65.5) | 0.002   |
| Hospital level                                  |             |            |             | 0.075   |



|    |                                   |             |            |             |
|----|-----------------------------------|-------------|------------|-------------|
| 1  |                                   |             |            |             |
| 2  |                                   |             |            |             |
| 3  | Secondary or lower                | 9045(37.0)  | 1576(35.9) | 7469(37.3)  |
| 4  | Tertiary hospital                 | 15373(63.0) | 2818(64.1) | 12555(62.7) |
| 5  |                                   |             |            |             |
| 6  | <b>Economic geographic region</b> |             |            | 0.01        |
| 7  | Eastern                           | 13614(55.8) | 2360(53.7) | 11254(56.2) |
| 8  | Central                           | 5886(24.1)  | 1115(25.4) | 4771(23.8)  |
| 9  | Western                           | 4918(20.1)  | 919(20.9)  | 3999(20.0)  |
| 10 |                                   |             |            |             |
| 11 | Urban/Rural                       |             |            | 0.003       |
| 12 | Rural                             | 10064(41.2) | 1724(39.2) | 8340(41.7)  |
| 13 | Urban                             | 14354(58.8) | 2670(60.8) | 11684(58.3) |
| 14 | <hr/>                             |             |            |             |
| 15 |                                   |             |            |             |
| 16 |                                   |             |            |             |
| 17 |                                   |             |            |             |
| 18 |                                   |             |            |             |
| 19 |                                   |             |            |             |
| 20 |                                   |             |            |             |
| 21 |                                   |             |            |             |
| 22 |                                   |             |            |             |
| 23 |                                   |             |            |             |
| 24 |                                   |             |            |             |
| 25 |                                   |             |            |             |
| 26 |                                   |             |            |             |
| 27 |                                   |             |            |             |
| 28 |                                   |             |            |             |
| 29 |                                   |             |            |             |
| 30 |                                   |             |            |             |
| 31 |                                   |             |            |             |
| 32 |                                   |             |            |             |
| 33 |                                   |             |            |             |
| 34 |                                   |             |            |             |
| 35 |                                   |             |            |             |
| 36 |                                   |             |            |             |
| 37 |                                   |             |            |             |
| 38 |                                   |             |            |             |
| 39 |                                   |             |            |             |
| 40 |                                   |             |            |             |
| 41 |                                   |             |            |             |
| 42 |                                   |             |            |             |
| 43 |                                   |             |            |             |
| 44 |                                   |             |            |             |
| 45 |                                   |             |            |             |
| 46 |                                   |             |            |             |
| 47 |                                   |             |            |             |
| 48 |                                   |             |            |             |
| 49 |                                   |             |            |             |
| 50 |                                   |             |            |             |
| 51 |                                   |             |            |             |
| 52 |                                   |             |            |             |
| 53 |                                   |             |            |             |
| 54 |                                   |             |            |             |
| 55 |                                   |             |            |             |
| 56 |                                   |             |            |             |
| 57 |                                   |             |            |             |
| 58 |                                   |             |            |             |
| 59 |                                   |             |            |             |
| 60 |                                   |             |            |             |

For peer review only



1  
2  
3 **Figure 1. Flowchart of study cohort**  
4  
5

6  
7 **Figure 2. Trends of intravenous magnesium sulfate therapy in 2001, 2006, 2011**  
8 **and 2015 in five economic-geographic regions.**  
9  
10

11  
12  
13 **Figure 3. IV magnesium sulfate use in 2001, 2006, 2011 and 2015 among all**  
14 **hospitals.**  
15  
16

17  
18  
19 **Figure 4. In-hospital outcomes between patients with and without IV**  
20 **magnesium sulfate.**  
21  
22  
23  
24  
25  
26  
27  
28  
29  
30  
31  
32  
33  
34  
35  
36  
37  
38  
39  
40  
41  
42  
43  
44  
45  
46  
47  
48  
49  
50  
51  
52  
53  
54  
55  
56  
57  
58  
59  
60

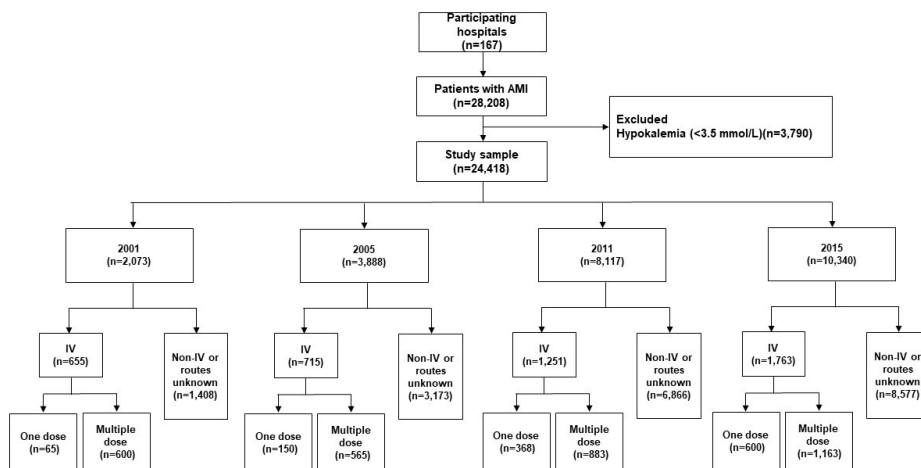

Figure 1

338x190mm (96 x 96 DPI)

1  
2  
3  
4  
5  
6  
7  
8  
9  
10  
11  
12  
13  
14  
15  
16  
17  
18  
19  
20  
21  
22  
23  
24  
25  
26  
27  
28  
29  
30  
31  
32  
33  
34  
35  
36  
37  
38  
39  
40  
41  
42  
43  
44  
45  
46  
47  
48  
49  
50  
51  
52  
53  
54  
55  
56  
57  
58  
59  
60

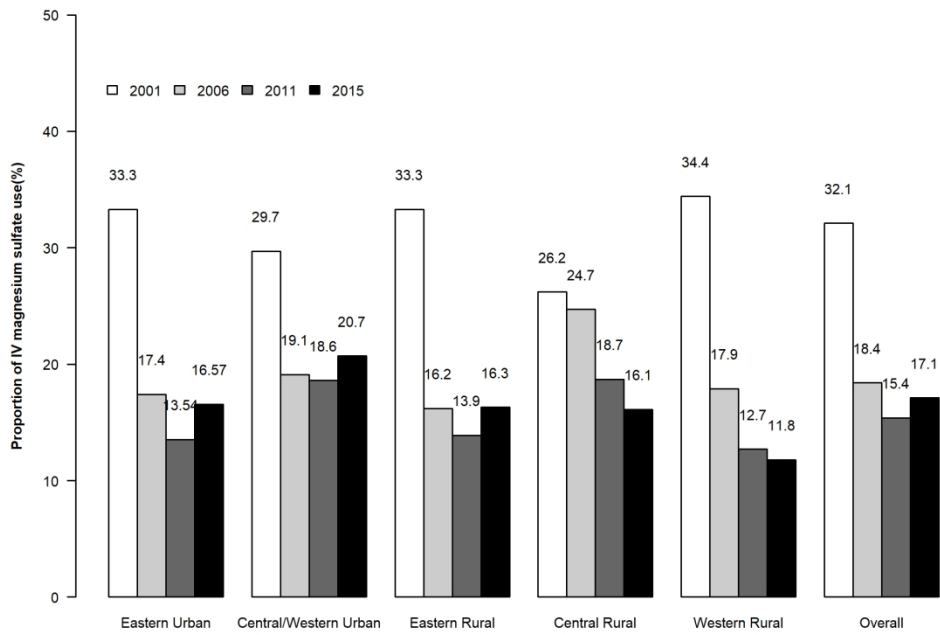

Figure 2

179x119mm (300 x 300 DPI)

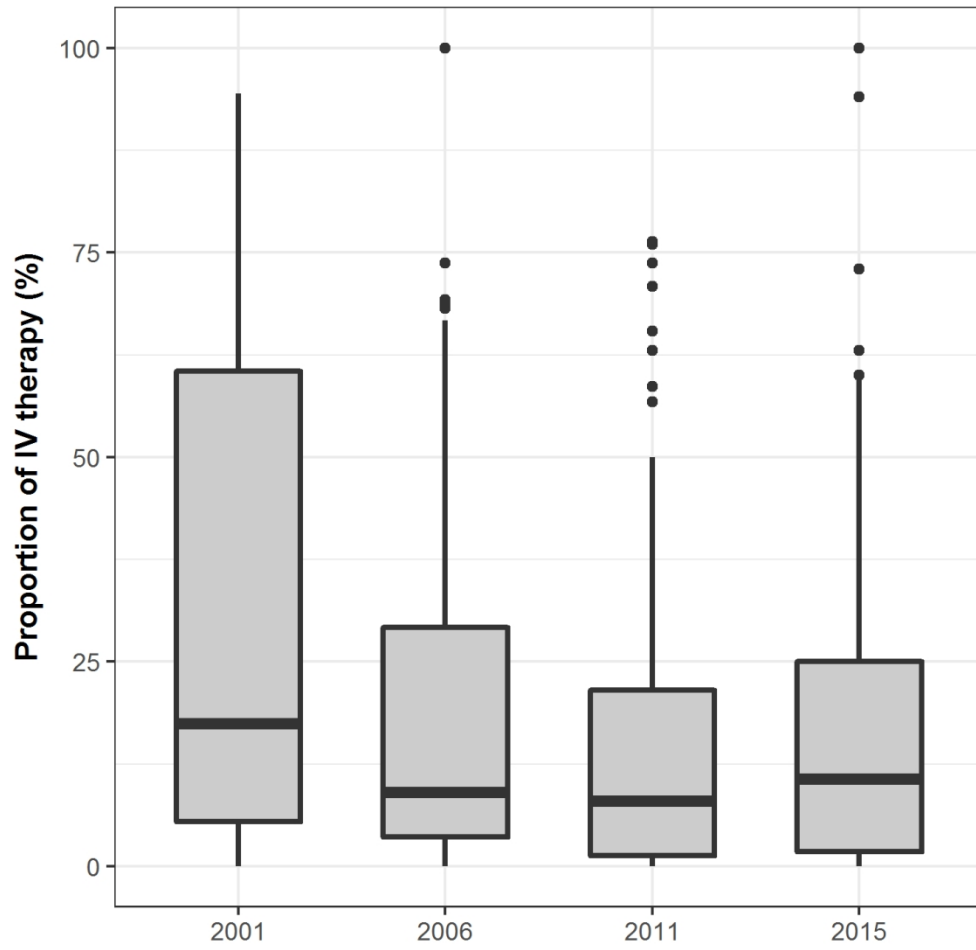

Figure 3

127x127mm (300 x 300 DPI)

1  
2  
3  
4  
5  
6  
7  
8  
9  
10  
11  
12  
13  
14  
15  
16  
17  
18  
19  
20  
21  
22  
23  
24  
25  
26  
27  
28  
29  
30  
31  
32  
33  
34  
35  
36  
37  
38  
39  
40  
41  
42  
43  
44  
45  
46  
47  
48  
49  
50  
51  
52  
53  
54  
55  
56  
57  
58  
59  
60

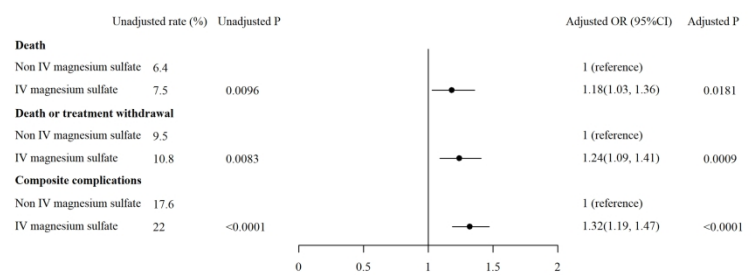

Figure 4  
249x119mm (300 x 300 DPI)

## APPENDIX

### A. China PEACE-Retrospective AMI Study Site Investigators by Hospital

Aba Tibetan and Qiang Autonomous Prefecture People's Hospital, ShipingWeng, ShuyingXie;  
Affiliated Hospital of Guiyang Medical College, Lirong Wu, Jiulin Chen; Affiliated Hospital of Hainan  
Medical College, Tianfa Li, Jun Wang; Affiliated Zhongshan Hospital of Dalian University, Qin Yu,  
Xiaofei Li; Alxa League Central Hospital, Zhong Li, ShiguoHao, Yuzhen Zhang, Xuemei Wu;  
Baiquan County People's Hospital, Yachen Zhang, Zhifeng Liu; Biyang People's Hospital, Zhongxin  
Wang, HaoJia; Bortala Mongol Autonomous Prefecture People's Hospital, Bayin Bate, BadengQiqige;  
Changda Hospital Of Anshan, Xiang Jin, Ting Cai; Chengwu County People's Hospital, Fengqin Liu,  
Dayong Xu; Chenxi County People's Hospital, Xuejin He, Shui Yang; Chongren County People's  
Hospital, Chun Yuan, Jiping Wang; County People's Hospital of Jinning, LihuaGu, Lin Li, Shijiao  
Chen; Dalian Municipal Central Hospital, YongchaoZhi, Lili Sun; Dao County People's Hospital,  
Shengcheng Zhou, Lingjiao Jin; Daofu County People's Hospital, Yong Leng, Liangchuan Zhang,  
Tianyun Deng; Dingyuan County People's Hospital of Anhui Province, Yuanjin Wang, Wenhua Zhang,  
Xinmin Ma; Dongyang People's Hospital, Weimin Li, Liang Lu, Xuan Ge; Dulong and Nu  
Autonomous County People's Hospital of Gongshan, Xiaoping Wu, Yanming He; Dunhua City  
Hospital of Jilin Province, FanjuMeng, Jia Li; Fenghuang County People's Hospital, Dexi Liao,  
Guangyong Liu, Wen Qin; Fengshan County People's Hospital, Wen Long, Xiangwen Chen; Fourth  
Hospital of Baotou City, Baohong Zhang, Yonghou Yin, Bin Tian; Fourth People's Hospital of Zigong  
City, Yong Yi, Chaoyong Wu; Fugu County People's Hospital of Shaanxi Province, Baoqi Liu, Zhihui  
Zhao, Haiming Li; Fujian Provincial Hospital, YansongGuo, Xinjing Chen; Fuling Center Hospital of  
Chongqing City, Liquan Xiang, Lin Ning; Gannan County People's Hospital, Mei Chen, Xin Jin,  
Guiling Li; General Hospital of the Yangtze River Shipping, Xiuqi Li, Xing'an Wu; Gongcheng Yao  
Autonomous County People's Hospital, Congjun Tan, Mingfang Feng, Meili Wang; Guangchang  
County People's Hospital, Liangfa Wen, Xiang Fu, QunxingXie; Guilin People's Hospital, Wei Zhang,  
Yanni Zhuang, Hua Lu; Guiping People's Hospital, Jiaqian Lu, Yu Huang; Haerbin 242 Hospital, Yin  
Zhou, Qiuling Hu; Haiyan People's Hospital, Chunhui Xiao, Xiaoli Hu; Heling Ge Er County People's  
Hospital, Yongshuan Wu, Qiuli Wang; Helong Municipal People's Hospital, Youlin Xu, Xuefei Yu;

1  
2  
3  
4 Henan Provincial People's Hospital, Chuanyu Gao, Jianhong Zhang, You Zhang; Heze Municipal  
5 Hospital, WentangNiu, Xiaolei Ma, Yong Wang; HGKY Group Company General Hospital, Xiaowen  
6 Pan, Yanlong Liu; Hua Xin HospitalFirst Hospital of Tsinghua University, Lifu Miao, Yanping Yin,  
7 Zhiying Zhang; Huairen People's Hospital, Shutang Feng; Huayin People's Hospital, Aiping Wang,  
8 Jiangli Zhang, Feipeng Li; Huaying People's Hospital , Hong Wang; Hunchun Hospital, Lijun Yu,  
9 Xinxin Zhao; Huizhou Municipal Central Hospital, Yuansheng Shen, Zhiming Li, Lizhen He; Hunan  
10 Province Mawangdui Hospital, ZhiyiRong, Wei Luo; Ji'an Municipal Central People's hospital,  
11 Xueqiao Wang; Jianghua Yao Autonomous County People's Hospital, Rongjun Wan, Jianglin Tang,  
12 Guanghan Wu; Jiangsu Haimen People's Hospital, Jie Wu, Bin Xu; Jiangxi Provincial People's  
13 Hospital, Qing Huang, Xiaohe Wu; Jiangzi County People's Hospital, Sang Ge, Pian Pu, PingcuoDuoji;  
14 Jilin Province People's Hospital, Hui Dai, Yuming Du, Wei Guo; Jilin Integrated Traditional Chinese  
15 & Western Medicine Hospital, Jilin Province, Jianping Shi; Jinghai County Hospital, Peihua Zhao,  
16 Jingsheng Sun; Jingxi County People's Hospital, Hongxiang Li, Wen Liang; Jingxing County Hospital,  
17 Zhiwen Dong, Zhenhai Zhao; Jingzhou Central Hospital, Xin Li, Qin Xu; Jiuquan City People's  
18 Hospital, Yaofeng Yuan, Zhirong Li; Jixi People's Hospital of The Jixi Municipal People's Hospital  
19 Medical Group, Jinbo Gao; Jize County Hospital, Qiu'eGuo; Kangbao County People's Hospital,  
20 Ruiqing Zhao, Guangjun Song; Keshiketengqi Hospital of Chifeng City, Lize Wang, Haiyun Song;  
21 Lanping Bai and Pumi Autonomous County People's Hospital, Jinwen He, Jinming He; Laoting  
22 County Hospital, Keyong Shang, Changjiang Liu, Kuituan Xi; Liaoyang Central Hospital, Rihui Liu,  
23 Peng Guo; Liaoyuan Central Hospital, ChaoyangGuo, Xiangjun Liu, Rujun Zhao, Zeyong Yu; Lindian  
24 County Hospital, Wenzhou Li, Xudong Jing, Huanling Wang; Linxiang People's Hospital, Xiyuan  
25 Zhao, Chao Zhang, Long Chen; Liujiang County People's Hospital, Meifa Wei, Yan Liu, Shengde  
26 Chen; Longyan First Hospital, Kaihong Chen, Yong Fang, Ying Liao; Luancheng County Hospital,  
27 Junli Wang, Tianyu Liu, Suzhe Cheng; Lucheng People's Hospital, Yunke Zhou, XiaoxiaNiu, Huifang  
28 Cao; Luchuan County People's Hospital, Zebin Feng, Min Feng; Luxi County People's Hospital,  
29 FeilongDuan, Haiming Yi; Luyi County People's Hospital, Yuanxun Xu, AnranGuo; Macheng People's  
30 Hospital, Xianshun Zhou, HongzhuanCai, Peng Zheng; Mengcheng First People's Hospital,  
31 GaofengGuo; MenglianLahudaiwa autonomous counties People's Hospital, Xiang Li; Min County  
32  
33  
34  
35  
36  
37  
38  
39  
40  
41  
42  
43  
44  
45  
46  
47  
48  
49  
50  
51  
52  
53  
54  
55  
56  
57  
58  
59  
60

1  
2  
3  
4 People's Hospital, MinwuBao, Yuhong Liu; Nanjing First Hospital, Shaoliang Chen, HaiboJia,  
5  
6 Hongjuan Peng; Nan'an Hospital, Duanping Dai, Shaoxiong Hong; Nantong Third People's Hospital,  
7  
8 Song Chen, Dongya Zhang, Ying Wang; Nanyang Central Hospital, Yudong Li, Jianbu Gao,  
9  
10 Shouzhong Yang; Ningwu County People's Hospital, Junhu An; Peking University People's Hospital,  
11  
12 Chenyang Shen, Yunfeng Liu; Peking University Shenzhen Hospital, Chun Wu, Huan Qu, Saiyong  
13  
14 Chen; People's Hospital of Jingyu, Yuhui Lin, Dehai Jiao; People's Hospital of Yueqing City, Manhong  
15  
16 Wang, Qiu Wang; Pianguan County People's Hospital, YingliangXue, Ruijun Zhang; Puding County  
17  
18 People's Hospital, Cheng Yuan, Lei Wu; Qinghai Red Cross Hospital, Jianqing Zhang, Chunmei Wei,  
19  
20 Yanmei Shen; Qinshui County People's Hospital, Hehua Zhang, Hongmei Pan, Yong Gao; Qinyang  
21  
22 People's Hospital, Xiaowen Ma, Yanli Liang, Tianbiao Wang; Queshan County People's Hospital,  
23  
24 Daguo Zhao; Quzhou People's Hospital, XiaomingTu, Zhenyan Gao; Rongjiang County People's  
25  
26 Hospital, Fangning Wang, Qiang Yang; Rudong County People's Hospital, Xiaoping Kang, Jianbin  
27  
28 Fang, Dongmei Liu; Ruyang County People's Hospital, Chengning Shen, Mengfei Li; Shangluo  
29  
30 Central Hospital, Yingmin Guan, Wenfeng Wang, Ting Xiao; ShangqiuChangzheng People's Hospital,  
31  
32 Qian Wang; Shaoyang County People's Hospital, Fengyun Jiang, Kaiyou Wu; Shengsi People's  
33  
34 Hospital, Songguo Wang; Shenyang Weikang Hospital, Xujie Fu, Shu Zhang, Lifang Gao;  
35  
36 ShougangShuicheng Iron & Steel (Group) Co., Ltd. General Hospital, Min Zhang, Kai Fu,  
37  
38 XiaojingDuan; Shuangshan Hospital Of Anshan, Rui Xiao, Ruixia Wu, Bin Li; Siziwang County  
39  
40 People's Hospital, Hongtu Zhang, Yuerong Ma, Zhonghui Cao; SunanYugur Autonomous County  
41  
42 People's Hospital, Zhansheng Ba, Wanhai Fu; Taizhou Hospital of Zhejiang Province, Jianjun Jiang,  
43  
44 YafeiMi, Weiwei Zhou; The Affiliated Hospital of Beihua University, Feng Sun, Qi Zhang, Shiyu  
45  
46 Zheng; The Fifth People's Hospital of Dalian, Jing Zhang, Yang Zhong; The First Affiliated Hospital  
47  
48 of Hebei North University, Fangjiang Li, Xiaoyuan Wang; The First Affiliated Hospital of Henan  
49  
50 University of Science & Technology, Pingshuan Dong, Laijing Du, Wei Liu; The First Affiliated  
51  
52 Hospital Of Jia Mu Si University, Zhaofa He, Meihua Jin; The First Hospital of Fuzhou City, Ting  
53  
54 Jiang, Zhuoyan Chen; The First Hospital of Xi'an, Manli Cheng, YuqiangJi; The First People's  
55  
56 Hospital of Danzhou, Youhua Zhou, Jvyuan Li; The First People's Hospital of Guangzhou, Yizhi Pan,  
57  
58 Jian Liu; The First People's Hospital of Guangyuan, Tianxun Wang, Ping Yang; The Fourth People's  
59  
60



1  
2  
3  
4 Hospital of Shangqiu Shi, Guiyu Huang, JianjunPan, QingliangCai, Qianying Wang; The General  
5  
6 Hospital of Yongzhou, Hunan Province, MingliLv; The people's hospital of Wuchuan, Yuanming Yi,  
7  
8 Xuelian Deng; The People's Hospital of Yuanling, Wenhua Chen, RongCai; The People's Hospital of  
9  
10 Zhijiang City, Bing Zhang; The Second Affiliated Hospital of Harbin Medical University, Bo Yu,  
11  
12 Yousheng Xu, Zhengqiu Wang; The Second Affiliated Hospital of Kunming Medical University, Jun  
13  
14 Shu, Ge Zhang, Kai Li; The Second Central Hospital of Baoding City, Guang Ma, PuxiaSuo; The  
15  
16 Second People's Hospital of Liaoyuan City, Aimin Zhang, Yongfen Kang; Tianjin Medical University  
17  
18 General Hospital, Zheng Wan, Yuemin Sun, Bo Bian; Tibet Autonomous Region People's Hospital,  
19  
20 Xuejun Hu, DawaCiren; Tongchuan Mining Bureau Central Hospital, GuojiongJia, Jieli Pan;  
21  
22 Tongliang County People's Hospital, Guofu Li, Hongliang Zhang, Longliang Zhan; Tongliao City  
23  
24 Horqin District First People's Hospital, Junping Fang, Xinli Yu; Ulanqab Central Hospital, Dacheng  
25  
26 Wang, Dajun Liu, Xinhong Cao; Wencheng County People's Hospital, Yi Tian,  
27  
28 HaishengZhu, Wanchuan Liu; Wuhai People's Hospital, Zhaohai Zhou, Lei Shi; Wuhu Second People's  
29  
30 Hospital, Wuwang Fang, Manxin Chen; Wulate County People's  
31  
32 Hospital, FuqinHan, JianyeFu, Yunmei Wang; Wuqiang County People's Hospital, Binglu Liu,  
33  
34 YanliangZhang, Xiupin Yuan; Wuyishan Municipal Hospital, Qingfei Lin, Yun Chen; Xiangtan County  
35  
36 People's Hospital, Yuliang Zhu, ZhiqiangCai; Xing County People's Hospital, Xingping Li, LirongAo;  
37  
38 Xingshan County People's Hospital, Shubing Wu, Hui Zhang; Xinmi First People's Hospital, Fusheng  
39  
40 Zhao, Guangming Yang; Xinshao County People's Hospital, Renfei Liu, Wenwei Ai; Xiuwu County  
41  
42 People's Hospital, JianbaoChang, Haijie Zhao; Xuanhan County People's Hospital, Qijun Ran, Xuan Ma;  
43  
44 Xupu County People's Hospital, Shijun Jiang, Xiaochun Shu; Yanggao County People's Hospital, Zhiru  
45  
46 Peng, Yan Han; Yanqing County Hospital, Jianbin Wang, Li Yang; Ying County People's Hospital, Yu  
47  
48 Shen, Xingcun Shang; Yitong Manchu Autonomous County First People's Hospital, Haifeng Wang;  
49  
50 Yongxing County People's Hospital, Hongyan Li, Zhisong Liao, Yang Cao; Yuanzhou District People's  
51  
52 Hospital of Guyuan City, Xiaoping Gao, MeiyongCai, Lining You; Yuncheng Central Hospital, Xuexin  
53  
54 Li, Shuqin Li, Yingjia Li; Yunlong County People's Hospital, Jianxun Yang, Song Ai, Jianfei Ma;  
55  
56 Yuyao People's Hospital, Lailin Deng; ZhangjiachuanHui Autonomous County First People's Hospital,  
57  
58 Keyu Wang, Shitang Gao, Jian Guan; Zhouning County Hospital, Banghua He, Youyi Lu; Zhuoni  
59  
60

1  
2  
3  
4 County People's Hospital, Weirong Yang, Hong Li; Zhuozi County People's Hospital, Zhizhong Zhang,  
5  
6 Xiaohong Chi; Zuoyun County People's Hospital, Ru Duan, Guangli Wang.  
7  
8  
9  
10  
11  
12  
13  
14  
15  
16  
17  
18  
19  
20  
21  
22  
23  
24  
25  
26  
27  
28  
29  
30  
31  
32  
33  
34  
35  
36  
37  
38  
39  
40  
41  
42  
43  
44  
45  
46  
47  
48  
49  
50  
51  
52  
53  
54  
55  
56  
57  
58  
59  
60

For peer review only

## **B. China PEACE hospital survey: design, conduction, and materials**

### **Participants**

In the collaborative network, we invited the principal investigator and the coordinator of each hospital to participate in the survey. The definitions of the roles were established during the planning phase of the China PEACE-Retrospective AMI Study: typically, the director of the Cardiology Department or Internal Medicine Department at each hospital served as the principal investigator, and the China PEACE study coordinator was most often a physician selected by the principal investigator.

### **Survey design**

We organized the survey in 4 sections: personal information of the respondent (part A); general information about the hospital and the department in charge of AMI care (part B); information about hospital practices relating to the diagnosis and treatment of cardiovascular heart disease (part C); and organizational learning characteristics and quality improvement for AMI care (part D). Organizational learning culture was measured using questions from the Short-Form Learning Organization Survey (LOS-27) and the Survival after AMI (SAMI) study.

The survey was written in English and translated into Chinese. To ensure accuracy, a double translation was conducted in which the survey was translated into Chinese and then back into English independently by 2 bilingual Chinese medical researchers. Modifications were made to the Chinese translation accordingly. Participants were informed at the start of the survey that their responses would be used to study institutional characteristics and medical care patterns.

### **Survey conduction**

The survey was piloted using a convenience sample of 6 hospitals with percutaneous coronary intervention capability. The principal investigators were invited to participate in the pilot, and one study coordinator also volunteered to participate. The responses of the 6 principal investigators (3 via in-person interviews and 3 via self-administered paper-based survey) and 1 study coordinator (via self-administered paper-based survey) were collected. The cognitive interviewing methodology, in which individual in-person interviews were conducted with each pilot participant, was used to assess understanding of the pilot survey. For paper-based pilot surveys, cognitive interviewing consisted of retrospective (post-survey) probes; for in-person interviews, concurrent (during survey) probes allowed

1  
2  
3  
4 participants to provide survey feedback in real-time. Based on the experience from the pilot, minor  
5  
6 revisions were made to clarify the meaning of certain questions, and the sequence of questions was  
7  
8 modified to improve logic and flow. No questions were removed or added. All data from the pilot  
9  
10 testing were included in the final data set.

11  
12 The survey was available in 2 forms: web-based e-survey, in which each participant was able to log in  
13  
14 with a unique password to a website where the survey was hosted, and PDF-based survey, in which  
15  
16 subjects digitally marked their answers in PDF files and returned the files via email. We applied 2  
17  
18 methods to ensure the quality of the responses. We checked the response data for completeness, either  
19  
20 by automatic verification (web-based) or by manual check by our staff (PDF-based), and on the basis  
21  
22 of logic. For the web-based e-survey submissions, we used automatic logic check and verification  
23  
24 while subjects were responding to the survey, and recorded total time spent on the survey. For the  
25  
26 PDF-based survey submissions, we conducted a manual logic check, focusing on whether subjects  
27  
28 correctly skipped inapplicable questions as indicated by the instructions in other parts of the survey. In  
29  
30 cases of missing or illogical (e.g., questions incorrectly skipped or completed) data for PDF-based  
31  
32 surveys, we contacted respondents by email and/or phone, informed them of which questions needed to  
33  
34 be resolved, and asked them to resubmit the survey with the necessary changes.  
35  
36  
37  
38  
39  
40  
41  
42  
43  
44  
45  
46  
47  
48  
49  
50  
51  
52  
53  
54  
55  
56  
57  
58  
59  
60

## Survey questionnaires

**A. Personal information**

- A.1 Gender:  
 Male  Female
- A.2 Education  
 Junior high school  
 Senior high school (technical school or technical secondary school)  
 College (junior college)  
 Postgraduate
- A.3 Clinical job title:  
 Consultant  Attendant  Resident  Nurse  Other, please specify: \_\_\_\_
- A.4 Senior administrative position in hospital:  
 No  Yes, please specify: \_\_\_\_
- A.5 You have been working in the department for \_\_\_\_ years.

**B. General Information of the hospital and the department**

**Instructions: This section focuses on characteristics of your hospital and department. For all questions, please reflect upon them during the 1-year period from 1/1/2011 to 12/31/2011 (for some of them, please consider 1/1/2001 to 12/31/2001, and 1/1/2006 to 12/31/2006, as specified). Even some questions in this section might be somewhat hard to answer immediately, especially those about the characteristics of your hospital or department in 2001 and 2006. Please try best to find the answer - as accurate as possible - to every applicable question.**

- B.1 Affiliated hospital of medical college:  
 No  Yes, please specify the name of the college: \_\_\_\_\_ [Skip to B3]
- B.2 Teaching hospital of medical college:  
 No  Yes, please specify the name of the college: \_\_\_\_\_

Total No. in your department

|                 | In 2001 | In 2006 | In 2011 |
|-----------------|---------|---------|---------|
| B.3 Beds        |         |         |         |
| B.4 Consultants |         |         |         |
| B.5 Attendants  |         |         |         |
| B.6 Residents   |         |         |         |
| B.7 Nurses      |         |         |         |

- B.8 Is there any other department in your hospital providing inpatient treatment for AMI?  
 No  Yes, please specify the name of the department: \_\_\_\_\_
- B.9 Coronary Care Unit (CCU) in hospital?  
 No  Yes, please specify the No. of beds: \_\_\_\_\_
- B.10 Cath lab in hospital?  
 No [Skip to B12]  Yes, please specify when started: \_\_\_\_\_
- B.11 How many qualified cardiac interventionalist there are in your hospital: \_\_\_\_\_  unknown
- B.12 Could CABG be performed in hospital?  
 No  Yes, please specify the No. of cases in 2011: \_\_\_\_\_

- B.13 Independent emergency department?  
 No  Yes, please specify the No. of cardiologists in charge in emergency department normally: \_\_\_\_\_
- B.14 Formal GCP training of clinical staff in your department?  
 No  Yes  Unknown
- B.15 Have your apartment participated in international clinical trials?  
 No  Yes, please specify the names of the trials: \_\_\_\_\_  Unknown
- B.16 SFDA certified site for CVD drug trials?  
 No  Yes  Unknown
- B.17 Existence of Ethics Committee in hospital?  
 No  Yes  Unknown
- Total No. in your hospital

|                                       | In 2001 | In 2006 | In 2011 |
|---------------------------------------|---------|---------|---------|
| B.18 Patients with stroke             |         |         |         |
| B.19 Patients with ischemic stroke    |         |         |         |
| B.20 Patients with hemorrhagic stroke |         |         |         |

- B.21 Independent neurology department?  
 No  Yes, please specify the No. of beds in the department: \_\_\_\_\_
- B.22 Carotid endarterectomy performed in hospital?  
 No  Yes, please specify when started: \_\_\_\_\_  Unknown
- B.23 Carotid stenting performed in hospital?  
 No  Yes, please specify when started: \_\_\_\_\_  Unknown

The average cost of the following items in your hospital

|      | Items                                                                                    | Cost, ¥ |
|------|------------------------------------------------------------------------------------------|---------|
| B.24 | Biochemical test, including glucose, lipid, liver function, renal function, CRP or hsCRP |         |
| B.25 | Coagulation function test                                                                |         |
| B.26 | BNP or NT-proBNP                                                                         |         |
| B.27 | Stress test                                                                              |         |
| B.28 | UCG                                                                                      |         |
| B.29 | Cardiac CT                                                                               |         |
| B.30 | Carotid US                                                                               |         |

### C. Diagnosis and treatment for CHD

**Instructions: This section focuses on hospital processes and care of patients with AMI. For all questions, please reflect upon them during the 1-year period from 1/1/2011 to 12/31/2011.**

- C.1 Routine diagnostic test of CK for ACS patients after admission?  
 No  Yes, please specify the average time delay in reporting results: \_\_\_\_\_  Unknown

- 1  
2  
3  
4  
5  
6  
7  
8  
9  
10  
11  
12  
13  
14  
15  
16  
17  
18  
19  
20  
21  
22  
23  
24  
25  
26  
27  
28  
29  
30  
31  
32  
33  
34  
35  
36  
37  
38  
39  
40  
41  
42  
43  
44  
45  
46  
47  
48  
49  
50  
51  
52  
53  
54  
55  
56  
57  
58  
59  
60
- C.2 Routine diagnostic test of CK-MB for ACS patients after admission?  
 No  Yes, please specify the average time delay in reporting results: \_\_\_\_\_  Unknown
- C.3 Routine diagnostic test of troponin for ACS patients after admission?  
 No  Yes, please specify the average time delay in reporting results: \_\_\_\_\_  Unknown
- C.4 Are patients who are stable after PCI admitted to an intensive care unit? SAMI-Q25  
 Always  Usually  Sometimes  Rarely  Unknown
- C.5 Did your emergency department use a uniform protocol to care for patients who arrived to the emergency department with **STEMI**? SAMI-Q26  
 No  Yes  Unknown
- C.6 Did your emergency department use a uniform protocol to care for patients who arrived to the emergency department with **Unstable Angina/NSTEMI**? SAMI-Q27  
 No  Yes  Unknown
- C.7 Did your hospital use simulations (i.e., trial exercises, dry-runs) to practice any of the following AMI care processes? [*Check all that apply*] SAMI-Q28  
 Door-to-balloon or door-to-drug protocols  
 Chest pain in hospitalized patients  
 Inpatient codes (e.g., cardiac arrest, respiratory failure)  
 None above  
 Unknown
- C.8 To which patient care unit were patients who were stable with Unstable Angina/NSTEMI most likely admitted? SAMI-Q29  
 CCU  ICU  Step-down unit  Designated chest pain/telemetry/cardiology floor  
 General medicine floor  We did not have a routine method of assigning beds for patients with Unstable Angina/NSTEMI  Unknown
- C.9 Did all, or nearly all, patients with AMI have a cardiologist as their primary attending physician? SAMI-Q30  
 No  Yes [**Skip to C11**]  Unknown

- 1  
2  
3  
4  
5  
6  
7  
8  
9  
10  
11  
12  
13  
14  
15  
16  
17  
18  
19  
20  
21  
22  
23  
24  
25  
26  
27  
28  
29  
30  
31  
32  
33  
34  
35  
36  
37  
38  
39  
40  
41  
42  
43  
44  
45  
46  
47  
48  
49  
50  
51  
52  
53  
54  
55  
56  
57  
58  
59  
60
- C.10 Were cardiology consults required for all patients with AMI? SAMI-Q30a
- No  Yes  Unknown
- C.11 In the intensive care unit, who was primarily responsible for the care of patients with AMI? [*Check all that apply*] SAMI-Q31
- Critical care physicians (i.e., intensivists)
- Cardiologist/s based exclusively in the unit
- Other cardiologists
- Other, please specify: \_\_\_\_\_
- Unknown
- C.12 Electronic medical record?
- No [**Skip to C14**]  Yes, please specify when started: \_\_\_\_\_  Unknown
- C.13 Did your hospital use an electronic medical record (EMR) in the following areas? [*Check all that apply*] SAMI-Q34
- Emergency department
- Inpatient floors
- Critical care units
- Affiliated ambulatory offices/clinics
- None above
- C.14 On the inpatient floors, did your hospital have the following electronic capabilities? [*Check all that apply*] SAMI-Q35
- Computerized assisted physician order entry
- Computer prompts to alert user to potential drug-drug interactions or allergies
- Computer prompts to alert user to potential errors in dosing and information
- Computer prompts to alert user to medication order expiration
- Computer prompts to improve adherence to core measures for AMI care (e.g., beta-blocker use)
- None above



1  
2  
3  
4  
5  
6  
7  
8  
9  
10  
11  
12  
13  
14  
15  
16  
17  
18  
19  
20  
21  
22  
23  
24  
25  
26  
27  
28  
29  
30  
31  
32  
33  
34  
35  
36  
37  
38  
39  
40  
41  
42  
43  
44  
45  
46  
47  
48  
49  
50  
51  
52  
53  
54  
55  
56  
57  
58  
59  
60

C.15 In the emergency department, were prior ECG's electronically available at the time of care?  
SAMI-Q36  
 No  Yes  Unknown

C.16 Did physicians regularly use explicit protocols or clinical pathways for patients with AMI?  
SAMI-Q37  
 No  Yes  Unknown

C.17 Did clinicians on the inpatient care units regularly use order sets (either paper-based or electronic) for patients with STEMI? SAMI-Q38  
 No  Yes  Unknown

C.18 Did clinicians on the inpatient care units regularly use order sets (either paper-based or electronic) for with Unstable Angina/NSTEMI? SAMI-Q39  
 No  Yes  Unknown

C.19 Which of the following types of physicians were at the hospital 24-hours/day and 7-days/week?  
***[Check all that apply]*** SAMI-Q42  
 Critical care physicians (i.e., intensivists)  
 Non-interventional cardiologists  
 Interventional cardiologists  
 Cardiology fellows (including non-interventional and interventional)  
 Hospitalists  
 None above

C.20 Are there any protocols used to guide nurses on when to call the attending cardiologist for patients with AMI? SAMI-Q43  
 No  Yes  Unknown

C.21 Patients with acute coronary syndrome who arrived by Emergency medical service (ambulance):  
 None **[Skip to C25]**  1–25%  26–50%  51–75%  76–100%   
Unknown

- 1  
2  
3  
4  
5  
6  
7  
8  
9  
10  
11  
12  
13  
14  
15  
16  
17  
18  
19  
20  
21  
22  
23  
24  
25  
26  
27  
28  
29  
30  
31  
32  
33  
34  
35  
36  
37  
38  
39  
40  
41  
42  
43  
44  
45  
46  
47  
48  
49  
50  
51  
52  
53  
54  
55  
56  
57  
58  
59  
60
- C.22 Emergency medical service routinely gives pre-alert calls?  
 No  Yes  Unknown
- C.23 Patients with acute coronary syndrome who undergo ECG en route to hospital:  
 None  1–25%  26–50%  51–75%  76–100%  Unknown
- C.24 Emergency medical service routinely tell your hospital the results of ECG?  
 No  Yes  Unknown
- C.25 Formal training of triage staff for assessing acute coronary syndrome?  
 No  Yes  Unknown
- C.26 Dedicated space in triage area for immediate ECG?  
 No  Yes  Unknown
- C.27 Written criteria for immediate ECG in emergency department?  
 No  Yes  Unknown
- C.28 Expected interval between patients' arriving and ECG?  
 ≤5 min  6–20 min  >20 min  No expected time  Unknown
- C.29 Dedicated ECG technicians in emergency department?  
 No  Yes, only some shifts  Yes, always  Unknown
- C.30 Thrombolysis for AMI patients in hospital?  
 No **[Skip to C38]**  Yes, please specify when started: \_\_\_\_\_
- C.31 Does your hospital have a set protocol to identify eligible patients for thrombolysis?  
 No  Yes  Unknown
- C.32 Does your hospital have a set protocol to assess contraindications of thrombolysis?  
 No  Yes  Unknown
- C.33 Who makes the decision about thrombolysis in your hospital?  
 Emergency medicine physician alone  
 Emergency medicine physician with a cardiac consultation  
 Only Cardiologist  
 Unknown

- 1  
2  
3  
4  
5  
6  
7  
8  
9  
10  
11  
12  
13  
14  
15  
16  
17  
18  
19  
20  
21  
22  
23  
24  
25  
26  
27  
28  
29  
30  
31  
32  
33  
34  
35  
36  
37  
38  
39  
40  
41  
42  
43  
44  
45  
46  
47  
48  
49  
50  
51  
52  
53  
54  
55  
56  
57  
58  
59  
60
- C.34 In your hospital, where do patients with AMI receive thrombolysis?
- In the emergency department
  - In the cardiology department (or general medicine department)
  - In the ICU or CCU
  - Unknown
- C.35 Where are the thrombolytic medicines stored and prepared?
- Stored and prepared in the department where thrombolysis is done
  - Prepared in the department where thrombolysis is done, but stored in another location
  - Stored and prepared in some location other than the department where thrombolysis is done
  - Unknown
- C.36 Informed Consent before thrombolysis?
- Not necessary
  - Only orally obtained informed consent is needed
  - One written informed consent form is needed
  - More than one written informed consent form is needed
  - Unknown
- C.37 Prepayment before thrombolysis?
- No
  - Yes, please specify the average amount approximately: \_\_\_\_ (“-1” if unknown)
  - Unknown
- C.38 Primary PCI was performed in your hospital for STEMI patients?
- No **[Skip to C60]**
  - Yes, please specify when started: \_\_\_\_
- C.39 Activation of catheterization laboratory on weekdays?
- Emergency medicine physician with cardiologist
  - Cardiologist alone
  - Emergency medicine physician alone
  - Unknown

- 1  
2  
3  
4  
5  
6  
7  
8  
9  
10  
11  
12  
13  
14  
15  
16  
17  
18  
19  
20  
21  
22  
23  
24  
25  
26  
27  
28  
29  
30  
31  
32  
33  
34  
35  
36  
37  
38  
39  
40  
41  
42  
43  
44  
45  
46  
47  
48  
49  
50  
51  
52  
53  
54  
55  
56  
57  
58  
59  
60
- C.40 Activation of catheterization laboratory at night and on weekends?
- Emergency medicine physician with cardiologist
  - Cardiologist alone
  - Emergency medicine physician alone
  - Unknown
- C.41 Process for activating catheterization team?
- After communicating with the emergency department, interventional cardiologist activates catheterization laboratory by calling staff or a central page operator
  - Emergency department makes at least two calls: one to the interventional cardiologist and another to a central page operator, who pages catheterization laboratory staff
  - Emergency department makes a single call to a central page operator, who then pages interventional cardiologist and catheterization laboratory staff
  - No standard approach
  - Other
  - Unknown
- C.42 Activation of on-call staff for catheterization laboratory?
- Page operator is not used
  - Page operator is used; confirmation of page receipt is required
  - Page operator is used; no confirmation of page receipt is required
  - No standard approach
  - Unknown
- C.43 First physician notified after STEMI diagnosis in emergency department?
- Cardiologist       Interventional cardiologist       Patient's primary care physician
  - Other or variable       Unknown
- C.44 Laboratory and radiographic results are needed to activate catheterization laboratory?
- Yes       No       No standard approach       Unknown

- 1  
2  
3  
4  
5  
6  
7  
8  
9  
10  
11  
12  
13  
14  
15  
16  
17  
18  
19  
20  
21  
22  
23  
24  
25  
26  
27  
28  
29  
30  
31  
32  
33  
34  
35  
36  
37  
38  
39  
40  
41  
42  
43  
44  
45  
46  
47  
48  
49  
50  
51  
52  
53  
54  
55  
56  
57  
58  
59  
60
- C.45 Process after emergency medical service transmits ECG results?
- Emergency department waits for patient to arrive at hospital to determine whether catheterization laboratory should be activated
  - Emergency department contacts cardiologist while the patient is en route to determine whether catheterization laboratory should be activated
  - Emergency department activates catheterization laboratory while the patient is still en route to the hospital
  - No standard approach or variable approach
  - Not applicable because ECG data not transmitted en route
  - Not applicable because ECG never performed en route
  - Unknown
- C.46 Expected interval between page and arrival of staff in catheterization laboratory?
- ≤20 min     21–30 min     >30 min     No expected time     Unknown
- C.47 Expected interval between page and arrival of interventional cardiologist?
- ≤20 min     21–30 min     >30 min     No expected time     Unknown
- C.48 Someone is always available to transport patients from emergency department to catheterization laboratory?
- No     Yes     Unknown
- C.49 Initiation of patient transport from emergency department to catheterization laboratory?
- After catheterization laboratory notifies emergency department it is ready
  - A set interval after the decision is made regarding PCI
  - No standard approach
  - Other approach
  - Unknown

- 1  
2  
3  
4  
5  
6  
7  
8  
9  
10  
11  
12  
13  
14  
15  
16  
17  
18  
19  
20  
21  
22  
23  
24  
25  
26  
27  
28  
29  
30  
31  
32  
33  
34  
35  
36  
37  
38  
39  
40  
41  
42  
43  
44  
45  
46  
47  
48  
49  
50  
51  
52  
53  
54  
55  
56  
57  
58  
59  
60
- C.50 Minimum number of nurses and technicians required in catheterization laboratory before patient is transported from emergency department?
- Interventional cardiologist must be present
  - Interventional cardiologist may not be present but need presence of 1 staff person
  - Interventional cardiologist may not be present but need presence of 2-4 staff person
  - No set number
  - Unknown
- C.51 Elective catheterization cases rescheduled for emergency PCI?
- Yes
  - No
  - It depends
  - Unknown
- C.52 If interventionalist is present, number of staff required to begin PCI?
- 1
  - 2
  - 3
  - 4
  - Unknown
- C.53 Catheterization laboratory is left so that next PCI can begin promptly?
- Yes
  - No
  - No standard policy
  - Unknown
- C.54 Cardiology fellows participate in performing PCI?
- No
  - Yes
  - Unknown
- C.55 Staff in critical care area are routinely cross-trained to cover catheterization laboratory?
- No
  - Yes
  - Unknown
- C.56 Location of catheterization laboratory?
- Elevator required to travel from emergency department
  - Same floor as emergency department
- C.57 An attending cardiologist is always at the hospital?
- No
  - Yes
  - Unknown

1  
2  
3  
4  
5  
6  
7  
8  
9  
10  
11  
12  
13  
14  
15  
16  
17  
18  
19  
20  
21  
22  
23  
24  
25  
26  
27  
28  
29  
30  
31  
32  
33  
34  
35  
36  
37  
38  
39  
40  
41  
42  
43  
44  
45  
46  
47  
48  
49  
50  
51  
52  
53  
54  
55  
56  
57  
58  
59  
60  
C.58

Informed Consent before primary PCI?

- Not necessary
- Only orally obtained informed consent is needed
- One written informed consent form is needed
- More than one written informed consent form is needed
- Unknown

C.59

Prepayment before primary PCI?

- No
- Yes, please specify the average amount approximately \_\_\_ (“-1” if unknown)
- Unknown

C.60

Does your hospital measure the following time intervals? *[Check all that apply]*

- Door to ECG
- Door to needle
- Door to balloon
- None above
- Unknown

C.61

Do your hospital feedback the time intervals to someone? *[Check all that apply]*

- No
- Yes, to physician staff involved in the care
- Yes, to nursing staff involved in the care
- Yes, to pharmacy staff involved in the care
- Yes, to other staff involved in the care
- Unknown

1  
2  
3  
4 C.62 Do your hospital report the analyze results about the time intervals regularly? *[Check all that apply]*

- 5  
6  No
- 7  
8  Yes, to departments involved in the care (the emergency department, the cardiology department)
- 9  
10  Yes, to other department in your hospital
- 11  
12  Yes, to other institutions outside your hospital
- 13  
14  Unknown

15  
16  
17 **D. Organizational learning characteristics**

18  
19 **Instructions:** This section focuses on the organizational learning and measurements to improve  
20 AMI care, including supportive environment and leadership, experimentation and training,  
21 knowledge acquisition, reflection and performance monitoring, etc. Please draw on your own  
22 experiences in your current role working with clinical staff and administration. For all  
23 questions, please reflect upon them during the 1-year period from 1/1/2011 to 12/31/2011.

24 Although some questions in this section look similar, there are differences between them and  
25 you should treat each one as a separate question. The best approach is to answer each question  
26 fairly quickly. That is, don't try to count up the number of times you felt a particular way, but  
27 rather indicate the alternative that seems most reasonable.

28 The definition of "workgroup" below is the department, unit, ward, or group caring AMI  
29 patients that you are working at.

30 This section adopts 7-point (from highly inaccurate to highly accurate). If you think the options  
31 are difficult to understand or distinguish, please grade the accuracy here using actual numbers,  
32 while 1 is the lowest (highly inaccurate), 7 is the highest (highly accurate), then choose the  
33 corresponding option.

- 34  
35  
36 D.1 In this workgroup, people value new ideas.
- 37  
38  highly inaccurate  inaccurate  somewhat inaccurate  not sure  somewhat accurate  accurate
- 39  
40  highly accurate
- 41  
42 D.2 Clinicians are encouraged to creatively solve problems related to AMI care processes. (60)
- 43  
44  Never  Rarely  Sometimes  Usually  Always
- 45  
46 D.3 Innovative ideas about AMI care are shared widely in the hospital. (61)
- 47  
48  Never  Rarely  Sometimes  Usually  Always
- 49  
50 D.4 Differences in opinions are welcomed in this workgroup.
- 51  
52  highly inaccurate  inaccurate  somewhat inaccurate  not sure  somewhat accurate  accurate
- 53  
54  highly accurate
- 55  
56  
57  
58  
59  
60



- 1  
2  
3  
4  
5  
6  
7  
8  
9  
10  
11  
12  
13  
14  
15  
16  
17  
18  
19  
20  
21  
22  
23  
24  
25  
26  
27  
28  
29  
30  
31  
32  
33  
34  
35  
36  
37  
38  
39  
40  
41  
42  
43  
44  
45  
46  
47  
48  
49  
50  
51  
52  
53  
54  
55  
56  
57  
58  
59  
60
- D.5 In this workgroup, people are open to alternative ways of getting work done.
- highly inaccurate
  - inaccurate
  - somewhat inaccurate
  - not sure
  - somewhat accurate
  - accurate
  - highly accurate
- D.6 People in this workgroup are eager to share information about what doesn't work as well as to share information about what does work.
- highly inaccurate
  - inaccurate
  - somewhat inaccurate
  - not sure
  - somewhat accurate
  - accurate
  - highly accurate
- D.7 This workgroup frequently compares its performance to: Best-in-class organizations.
- highly inaccurate
  - inaccurate
  - somewhat inaccurate
  - not sure
  - somewhat accurate
  - accurate
  - highly accurate
- D.8 This workgroup frequently compares its performance to: Other similar workgroups.
- highly inaccurate
  - inaccurate
  - somewhat inaccurate
  - not sure
  - somewhat accurate
  - accurate
  - highly accurate
- D.9 This workgroup consistently collects information on technological trends.
- highly inaccurate
  - inaccurate
  - somewhat inaccurate
  - not sure
  - somewhat accurate
  - accurate
  - highly accurate
- D.10 If you make a mistake in this workgroup, it is often held against you. (Among clinicians taking care of patients with AMI, there is a tendency to blame individuals for errors in patient care). (66)
- Never
  - Rarely
  - Sometimes
  - Usually
  - Always
- D.11 Clinicians caring for patients with AMI are easily able to address problems and tough issues with their department heads/chiefs. (56)
- Never
  - Rarely
  - Sometimes
  - Usually
  - Always
- D.12 Department heads/chiefs are easily able to address problems and tough issues with senior level administration.(57)
- Never
  - Rarely
  - Sometimes
  - Usually
  - Always
- D.13 Nurses are comfortable checking with physicians if they have concerns about patient care.(65)
- Never
  - Rarely
  - Sometimes
  - Usually
  - Always

- 1  
2  
3  
4  
5  
6  
7  
8  
9  
10  
11  
12  
13  
14  
15  
16  
17  
18  
19  
20  
21  
22  
23  
24  
25  
26  
27  
28  
29  
30  
31  
32  
33  
34  
35  
36  
37  
38  
39  
40  
41  
42  
43  
44  
45  
46  
47  
48  
49  
50  
51  
52  
53  
54  
55  
56  
57  
58  
59  
60
- D.14 Clinicians involved in the care of patients with AMI value each others' skills and talents (e.g., physicians value nurses' skills and talents and vice-versa).(58)
- Never  Rarely  Sometimes  Usually  Always
- D.15 Clinicians involved in the care of patients with AMI avoid sharing responsibility for medical errors.
- Never  Rarely  Sometimes  Usually  Always. (59)
- Never  Rarely  Sometimes  Usually  Always
- D.16 Were physicians explicitly encouraged to disclose medical errors to patients or their family members? (7)
- Never  Rarely  Sometimes  Usually  Always
- D.17 This workgroup engages in productive conflict and debate during discussions.
- highly inaccurate  inaccurate  somewhat inaccurate  not sure  somewhat accurate  accurate
- highly accurate
- D.18 In this workgroup, we frequently identify and discuss underlying assumptions that might affect key decisions.
- highly inaccurate  inaccurate  somewhat inaccurate  not sure  somewhat accurate  accurate
- highly accurate
- D.19 The hospital has the resources and information it needs to reduce 30-day mortality rates in patients with AMI. (51)
- Never  Rarely  Sometimes  Usually  Always
- D.20 Senior-level administration is supportive of efforts to improve AMI care. (52)
- Never  Rarely  Sometimes  Usually  Always
- D.21 There is simply no time for reflection in this workgroup.
- highly inaccurate  inaccurate  somewhat inaccurate  not sure  somewhat accurate  accurate
- highly accurate
- D.22 In this workgroup, people are too busy to invest time in improvement.
- highly inaccurate  inaccurate  somewhat inaccurate  not sure  somewhat accurate  accurate
- highly accurate

- 1  
2  
3  
4 D.23 My manager(s) establish(es) forums for and provide(s) time and resources for identifying problems  
5 and organizational challenges.  
6  
7  
8  highly inaccurate  inaccurate  somewhat inaccurate  not sure  somewhat accurate  accurate  
9  
10  highly accurate
- 11  
12 D.24 My manager(s) establish(es) forums for and provide(s) time and resources for reflecting and  
13 improving on past performance.  
14  
15  
16  highly inaccurate  inaccurate  somewhat inaccurate  not sure  somewhat accurate  accurate  
17  
18  highly accurate
- 19  
20 D.25 My manager(s) listen(s) attentively.  
21  
22  
23  highly inaccurate  inaccurate  somewhat inaccurate  not sure  somewhat accurate  accurate  
24  
25  highly accurate
- 26  
27 D.26 My manager(s) invite(s) input from others in discussions.  
28  
29  
30  highly inaccurate  inaccurate  somewhat inaccurate  not sure  somewhat accurate  accurate  
31  
32  highly accurate
- 33  
34 D.27 This workgroup experiments frequently with new product/service offerings.  
35  
36  
37  highly inaccurate  inaccurate  somewhat inaccurate  not sure  somewhat accurate  accurate  
38  
39  highly accurate
- 40  
41 D.28 This workgroup experiments frequently with new ways of working.  
42  
43  
44  highly inaccurate  inaccurate  somewhat inaccurate  not sure  somewhat accurate  accurate  
45  
46  highly accurate
- 47  
48 D.29 This workgroup frequently employs pilot projects or simulations when trying our new ideas.  
49  
50  
51  highly inaccurate  inaccurate  somewhat inaccurate  not sure  somewhat accurate  accurate  
52  
53  highly accurate
- 54  
55 D.30 This workgroup has a formal process for conducting and evaluating experiments or new ideas.  
56  
57  
58  highly inaccurate  inaccurate  somewhat inaccurate  not sure  somewhat accurate  accurate  
59  
60  highly accurate

- 1  
2  
3  
4  
5  
6  
7  
8  
9  
10  
11  
12  
13  
14  
15  
16  
17  
18  
19  
20  
21  
22  
23  
24  
25  
26  
27  
28  
29  
30  
31  
32  
33  
34  
35  
36  
37  
38  
39  
40  
41  
42  
43  
44  
45  
46  
47  
48  
49  
50  
51  
52  
53  
54  
55  
56  
57  
58  
59  
60
- D.31 Experienced employees in this workgroup receive training when new initiatives are launched.
- highly inaccurate  inaccurate  somewhat inaccurate  not sure  somewhat accurate  accurate
- highly accurate
- D.32 Experienced employees in this workgroup receive training when shifting to a new position.
- highly inaccurate  inaccurate  somewhat inaccurate  not sure  somewhat accurate  accurate
- highly accurate
- D.33 Newly hired employees in this workgroup receive adequate training.
- highly inaccurate  inaccurate  somewhat inaccurate  not sure  somewhat accurate  accurate
- highly accurate
- D.34 Did your hospital provide training to EMS providers about AMI care? (17)
- Yes, about monthly
- Yes, about quarterly
- Yes, about annually
- Yes, other: \_\_\_\_\_
- No
- Unknown
- D.35 This workgroup has forums for meeting with and learning from: Experts from outside the organization.
- highly inaccurate  inaccurate  somewhat inaccurate  not sure  somewhat accurate  accurate
- highly accurate
- D.36 This workgroup has forums for meeting with and learning from: Experts from other departments/teams/divisions.
- highly inaccurate  inaccurate  somewhat inaccurate  not sure  somewhat accurate  accurate
- highly accurate
- D.37 This workgroup has forums for meeting with and learning from: Customers/clients.
- highly inaccurate  inaccurate  somewhat inaccurate  not sure  somewhat accurate  accurate
- highly accurate

- 1  
2  
3  
4  
5  
6  
7  
8  
9  
10  
11  
12  
13  
14  
15  
16  
17  
18  
19  
20  
21  
22  
23  
24  
25  
26  
27  
28  
29  
30  
31  
32  
33  
34  
35  
36  
37  
38  
39  
40  
41  
42  
43  
44  
45  
46  
47  
48  
49  
50  
51  
52  
53  
54  
55  
56  
57  
58  
59  
60
- D.38 This workgroup regularly conducts post-audits, after-action reviews, and debriefings.
- highly inaccurate
  - inaccurate
  - somewhat inaccurate
  - not sure
  - somewhat accurate
  - accurate
  - highly accurate
- D.39 Did your hospital have regular ‘morbidity and mortality’ conferences (or another educational session) for discussing individual cases involving patients with AMI? (5)
- Never
  - Rarely
  - Sometimes
  - Usually
  - Always
- D.40 Did your hospital review the deaths of patients with AMI? (4a)
- No, we did not review these cases (**go to D44**)
  - Yes, we reviewed **only** deaths with potential quality issues (i.e., unexpected deaths)
  - Yes, we reviewed *all* deaths
  - Other, please specify: \_\_\_\_\_
  - Unknown
- D.41 Did your hospital have a **designated person or group** to review the deaths of patients with AMI (i.e., on an individual case level) that occurred during hospitalization? (4)
- Never
  - Rarely
  - Sometimes
  - Usually
  - Always
- D.42 How long after the occurrence of the death were the cases typically reviewed? (4b)
- Within one week of the death
  - Within one month of the death
  - Within 3 months of the death
  - Other, please specify: \_\_\_\_\_
  - We did not have a set timeframe for reviewing these cases
  - Unknown

- 1  
2  
3  
4  
5  
6  
7  
8  
9  
10  
11  
12  
13  
14  
15  
16  
17  
18  
19  
20  
21  
22  
23  
24  
25  
26  
27  
28  
29  
30  
31  
32  
33  
34  
35  
36  
37  
38  
39  
40  
41  
42  
43  
44  
45  
46  
47  
48  
49  
50  
51  
52  
53  
54  
55  
56  
57  
58  
59  
60
- D.43 Who usually reviewed these cases? (4c)
- a. Senior management of the hospital
- Never  Rarely  Sometimes  Usually  Always
- b. Cardiology chiefs
- Never  Rarely  Sometimes  Usually  Always
- c. Nursing directors
- Never  Rarely  Sometimes  Usually  Always
- d. Other physicians participating in the care of patients with AMI
- Never  Rarely  Sometimes  Usually  Always
- e. Quality Improvement/Quality Management department staff
- Never  Rarely  Sometimes  Usually  Always
- D.44 Did your hospital have a **designated person or group** to review any of the following **adverse events** in patients with AMI (i.e., on an individual case level)? (6)
- a. Sentinel events (unexpected occurrence involving death or serious physical or psychological injury) that occurred during hospitalization
- Never  Rarely  Sometimes  Usually  Always
- b. Unexpected transfers from a floor (non-monitored unit) to an intensive care unit
- Never  Rarely  Sometimes  Usually  Always
- c. Catastrophic complications that occurred immediately after discharge from the hospital
- Never  Rarely  Sometimes  Usually  Always
- D.45 How long after the occurrence of these adverse events were the cases typically reviewed? (6a)
- Within one week of the adverse event
- Within one month of the adverse event
- Within 3 months of the adverse event
- Other, please specify: \_\_\_\_\_
- We did not have a set timeframe for reviewing these cases
- Unknown

- 1  
2  
3  
4  
5  
6  
7  
8  
9  
10  
11  
12  
13  
14  
15  
16  
17  
18  
19  
20  
21  
22  
23  
24  
25  
26  
27  
28  
29  
30  
31  
32  
33  
34  
35  
36  
37  
38  
39  
40  
41  
42  
43  
44  
45  
46  
47  
48  
49  
50  
51  
52  
53  
54  
55  
56  
57  
58  
59  
60
- D.46 Who usually reviewed these cases? (6b)
- a. Senior management of the hospital
- Never  Rarely  Sometimes  Usually  Always
- b. Cardiology chiefs
- Never  Rarely  Sometimes  Usually  Always
- c. Nursing directors
- Never  Rarely  Sometimes  Usually  Always
- d. Other physicians participating in the care of patients with AMI
- Never  Rarely  Sometimes  Usually  Always
- e. Quality Improvement/Quality Management department staff
- Never  Rarely  Sometimes  Usually  Always
- f. Other, please specify: \_\_\_\_
- D.47 Did your hospital use root cause analysis or a similar method to understand the following problems in AMI care?
- a. Poor adherence to the core medication (i.e., anti-platelet agents) measures
- Never  Rarely  Sometimes  Usually  Always
- b. Delay to fibrinolytic therapy or percutaneous coronary intervention (PCI)
- Never  Rarely  Sometimes  Usually  Always
- D.48 Did your hospital review data on **30-day mortality rates** (deaths occurring within 30 days of admission, including both inpatient and post-discharge deaths) in patients admitted with AMI (Check all that apply) (10)
- Yes, through the medical insurance data system
- Yes, through a regional database system
- Yes, we internally collect our own data on deaths
- Yes, other, please specify: \_\_\_\_
- No [**Skip to D52**]
- Unknown

- 1  
2  
3  
4  
5  
6  
7  
8  
9  
10  
11  
12  
13  
14  
15  
16  
17  
18  
19  
20  
21  
22  
23  
24  
25  
26  
27  
28  
29  
30  
31  
32  
33  
34  
35  
36  
37  
38  
39  
40  
41  
42  
43  
44  
45  
46  
47  
48  
49  
50  
51  
52  
53  
54  
55  
56  
57  
58  
59  
60
- D.49 How quickly were **mortality rates** in patients with AMI available to your hospital (i.e., what was the most current data available to your hospital)? (10a)
- Within 6 months of care delivery
  - 6 months to 1 year after care delivery
  - 1 - 2 years after care delivery
  - Less frequently than 2 years of care delivery
  - Unknown
- D.50 Did your hospital regularly compare its performance to other hospitals on either **inpatient** in patients with AMI? (14)
- Never  Rarely  Sometimes  Usually  Always
- D.51 Did your hospital have **efforts** to improve any of the following inpatient acute myocardial infarction (AMI) quality measures? (1)
- a. Adherence to the core medication (i.e., anti-platelet agents) measures
- Never  Rarely  Sometimes  Usually  Always
- b. Time to fibrinolytic therapy or percutaneous coronary intervention (PCI)
- Never  Rarely  Sometimes  Usually  Always
- D.52 Beyond these quality measures, did your hospital initiate **efforts** to improve any of the following in patients admitted with AMI? (2)
- a. Inpatient mortality in patients with AMI
- Never  Rarely  Sometimes  Usually  Always
- b. **Post-discharge** mortality (death occurring after discharge, but within 30 days of admission) in patients with AMI
- Never  Rarely  Sometimes  Usually  Always
- c. Readmission within 30 days from prior admission in patients with AMI
- Never  Rarely  Sometimes  Usually  Always



- 1  
2  
3  
4  
5  
6  
7  
8  
9  
10  
11  
12  
13  
14  
15  
16  
17  
18  
19  
20  
21  
22  
23  
24  
25  
26  
27  
28  
29  
30  
31  
32  
33  
34  
35  
36  
37  
38  
39  
40  
41  
42  
43  
44  
45  
46  
47  
48  
49  
50  
51  
52  
53  
54  
55  
56  
57  
58  
59  
60
- D.53 Did your hospital have a quality improvement **team(s)** devoted to improving: (3)
- a. Inpatient mortality in patients with AMI
- Never  Rarely  Sometimes  Usually  Always
- b. Post-discharge mortality (death occurring after discharge, but within 30 days of admission) in patients with AMI
- Never  Rarely  Sometimes  Usually  Always
- D.54 3a. Please indicate members of either the inpatient or post-discharge mortality **team(s)**.
- a. Senior management of the hospital
- Never  Rarely  Sometimes  Usually  Always
- b. Hospital governing board
- Never  Rarely  Sometimes  Usually  Always
- c. Chief of cardiology
- Never  Rarely  Sometimes  Usually  Always
- d. Nursing directors
- Never  Rarely  Sometimes  Usually  Always
- e. Other physicians participating in the care of patients with AMI
- Never  Rarely  Sometimes  Usually  Always
- f. Quality Improvement/Quality Management department staff
- Never  Rarely  Sometimes  Usually  Always
- g. Other please specify: \_\_\_\_\_
- D.55 Nurses are engaged in efforts to improve AMI care. (53)
- Never  Rarely  Sometimes  Usually  Always
- D.56 Cardiologists are engaged in efforts to improve AMI care. (54)
- Never  Rarely  Sometimes  Usually  Always
- D.57 Emergency medicine physicians are engaged in efforts to improve AMI care. (55)
- Never  Rarely  Sometimes  Usually  Always

- 1  
2  
3  
4  
5  
6  
7  
8  
9  
10  
11  
12  
13  
14  
15  
16  
17  
18  
19  
20  
21  
22  
23  
24  
25  
26  
27  
28  
29  
30  
31  
32  
33  
34  
35  
36  
37  
38  
39  
40  
41  
42  
43  
44  
45  
46  
47  
48  
49  
50  
51  
52  
53  
54  
55  
56  
57  
58  
59  
60
- D.58 Did your hospital have one or more physician champions focused on improving either **inpatient** or **30-day mortality** in patients with AMI? (12)
- Never  Rarely  Sometimes  Usually  Always
- D.59 Did your hospital have one or more nurse champions focused on improving either **inpatient** or **30-day mortality** in patients with AMI? (13)
- Never  Rarely  Sometimes  Usually  Always
- D.60 After we make changes to improve AMI care, we fail to evaluate their effectiveness. (67)
- Never  Rarely  Sometimes  Usually  Always
- D.61 Did cardiology and emergency department staff meet together to review care for patients with AMI? (15)
- Yes, about monthly
- Yes, about quarterly
- Yes, about annually
- Yes, other: \_\_\_\_\_
- No [**Skip to D63**]
- Unknown
- D.62 What was typically discussed at these meetings? (15a).
- a. Care of patients with ST-elevation myocardial infarction (STEMI)
- Never  Rarely  Sometimes  Usually  Always
- b. Care of patients with Unstable Angina/**non**-STEMI (NSTEMI)
- Never  Rarely  Sometimes  Usually  Always
- c. Care of patients with chest pain, in general
- Never  Rarely  Sometimes  Usually  Always

- 1  
2  
3  
4  
5  
6  
7  
8  
9  
10  
11  
12  
13  
14  
15  
16  
17  
18  
19  
20  
21  
22  
23  
24  
25  
26  
27  
28  
29  
30  
31  
32  
33  
34  
35  
36  
37  
38  
39  
40  
41  
42  
43  
44  
45  
46  
47  
48  
49  
50  
51  
52  
53  
54  
55  
56  
57  
58  
59  
60
- D.63 Did clinicians from your hospital meet with emergency medical system (EMS) providers to review the care of patients with AMI? (16)
- Yes, about monthly
  - Yes, about quarterly
  - Yes, about annually
  - Yes, other: \_\_\_\_\_
  - No
  - Unknown
- D.64 There is good coordination among the different departments involved with the care of patients with AMI. (62)
- Never  Rarely  Sometimes  Usually  Always
- D.65 Departments caring for patients with AMI (e.g., cardiology, emergency medicine) communicate easily with each other.(64)
- Never  Rarely  Sometimes  Usually  Always
- D.66 Clinicians caring for patients with AMI share new evidence-based approaches with the AMI team.(63)
- Never  Rarely  Sometimes  Usually  Always
- D.67 Which best describes the quality of your interaction with hospitals **that referred patients to you with AMI?**(18)
- Very collaborative (we shared data along with strategies for improving AMI care)  Somewhat collaborative (we communicated regularly, but we did not share data and strategies)
  - Not collaborative (we had no or minimal contact with the referring hospital/s)
  - Not applicable [**Skip to D69**]

1  
2  
3  
4 D.68 Did your hospital routinely give feedback to the referring hospital/s on any of the following?

5 (18a.)

6  
7 a. Time to transfer

8  
9  Never  Rarely  Sometimes  Usually  Always

10  
11 b. AMI-related procedures performed

12  
13  Never  Rarely  Sometimes  Usually  Always

14  
15 c. Patient outcome

16  
17  Never  Rarely  Sometimes  Usually  Always

18  
19 d. Other please specify: \_\_\_\_\_

20  
21  
22 D.69 Which best describes the quality of your interaction with hospitals **that you referred patients to**  
23 **with AMI?** (19)

24  
25  Very collaborative (we shared data along with strategies for improving AMI care)  Somewhat  
26 collaborative (we communicated regularly, but we did not share data and strategies)

27  
28  Not collaborative (we had no or minimal contact with hospitals in our region)

29  
30  Not applicable

31  
32  
33  
34 D.70 Was your hospital part of a regional effort or consortium of hospitals to improve AMI care? (20)

35  
36  Never  Rarely  Sometimes  Usually  Always

### C. Definition of In-hospital Complications

#### 1) Re-infarction

Indicate if there is physician documentation of recurrent myocardial infarction during hospitalization.

#### 2) Cardiogenic shock

Indicate if there is physician documentation of cardiogenic shock during hospitalization.

#### 3) Ischemic stroke

Indicate if there are physician documentations of new-onset ischemia stroke and stroke-related symptoms during hospitalization. The stroke-related symptoms include: trouble walking/loss of balance/incoordination, one-sided numbness or hemi-anesthesia, one-sided facial numbness or hemi-anesthesia, mouth askew and drooling, dysarthria or slurred speech, loss of vision or blurred vision in one or both eyes, dizziness with vomiting, severe headache and vomiting, unconsciousness, and hyperspasmia.

#### 4) Congestive heart failure

Indicate if there is physician documentation of heart failure during hospital stay. This include those without a history of heart failure but develop heart failure during hospitalization, and those with a history of heart failure as a chronic comorbidity and develop worsening heart failure during hospitalization.

**D. Baseline characteristics of patients with hypokalaemia**

| Characteristics                   | Overall    | Use N(%)  | Non-Use(%) | P value |
|-----------------------------------|------------|-----------|------------|---------|
| <b>Patient characteristics</b>    |            |           |            |         |
| Age                               |            |           |            | 0.005   |
| <55                               | 753(19.9)  | 170(20)   | 583(19.8)  |         |
| 55-64                             | 873(23)    | 225(26.5) | 648(22)    |         |
| 65-74                             | 1135(29.9) | 260(30.6) | 875(29.8)  |         |
| >=75                              | 1029(27.2) | 195(22.9) | 834(28.4)  |         |
| Gender                            |            |           |            | 0.621   |
| Female                            | 1508(39.8) | 332(39.1) | 1176(40)   |         |
| Male                              | 2282(60.2) | 518(60.9) | 1764(60)   |         |
| Hypertension                      | 2318(61.2) | 547(64.4) | 1771(60.2) | 0.060   |
| Diabetes                          | 655(17.3)  | 131(15.4) | 524(17.8)  | 0.101   |
| Dyslipidemia                      | 212(5.6)   | 38(4.5)   | 174(5.9)   | 0.106   |
| Currently smoking                 | 1170(30.9) | 286(33.6) | 884(30.1)  | 0.057   |
| Prior ischemic stroke             | 452(11.9)  | 102(12)   | 350(11.9)  | 0.940   |
| Prior myocardial infarction       | 325(8.6)   | 91(10.7)  | 234(8)     | 0.012   |
| Prior CABG/PCI                    | 97(2.6)    | 23(2.7)   | 74(2.5)    | 0.759   |
| Chest discomfort                  | 3380(89.2) | 764(89.9) | 2616(89)   | 0.455   |
| Left branch block at presentation | 59(1.6)    | 16(1.9)   | 43(1.5)    | 0.384   |
| Cardiac arrest at presentation    | 80(2.1)    | 28(3.3)   | 52(1.8)    | 0.006   |
| Cardiogenic shock at presentation | 306(8.1)   | 83(9.8)   | 223(7.6)   | 0.040   |
| Acute stroke at presentation      | 102(2.7)   | 16(1.9)   | 86(2.9)    | 0.098   |
| Heart rate at presentation, bpm   |            |           |            | 0.457   |
| <50                               | 163(4.3)   | 36(4.2)   | 127(4.3)   |         |
| 50-110                            | 3331(87.9) | 739(86.9) | 2592(88.2) |         |
| >110                              | 296(7.8)   | 75(8.8)   | 221(7.5)   |         |
| SBP at presentation, mmHg         |            |           |            | 0.046   |
| <120                              | 1263(33.3) | 314(36.9) | 949(32.3)  |         |
| 120-139                           | 1096(28.9) | 223(26.2) | 873(29.7)  |         |

|                                 |            |           |            |        |
|---------------------------------|------------|-----------|------------|--------|
| 140-159                         | 771(20.3)  | 162(19.1) | 609(20.7)  |        |
| >=160                           | 660(17.4)  | 151(17.8) | 509(17.3)  |        |
| Reperfusion therapies           |            |           |            | <0.001 |
| No reperfusion                  | 557(14.7)  | 156(18.4) | 401(13.6)  |        |
| Fibrinolytic therapy            | 2809(74.1) | 585(68.8) | 2224(75.6) |        |
| Primary PCI                     | 424(11.2)  | 109(12.8) | 315(10.7)  |        |
| <b>Hospital characteristics</b> |            |           |            |        |
| Teaching hospital               | 3042(80.3) | 707(83.2) | 2335(79.4) | 0.015  |
| PCI capable hospital            | 2455(64.8) | 581(68.4) | 1874(63.7) | 0.013  |
| Hospital level                  |            |           |            | 0.047  |
| Secondary or lower              | 1507(39.8) | 313(36.8) | 1194(40.6) |        |
| Tertiary hospital               | 2283(60.2) | 537(63.2) | 1746(59.4) |        |
| Economic geographic region      |            |           |            | 0.682  |
| Eastern                         | 798(21.1)  | 184(21.6) | 614(20.9)  |        |
| Central                         | 2163(57.1) | 474(55.8) | 1689(57.4) |        |
| Western                         | 829(21.9)  | 192(22.6) | 637(21.7)  |        |
| Urban/Rural                     |            |           |            | 0.023  |
| Rural                           | 1739(45.9) | 361(42.5) | 1378(46.9) |        |
| Urban                           | 2051(54.1) | 489(57.5) | 1562(53.1) |        |

### E. Predictors of the use of IV magnesium sulphate

| Variable                       | Unadjusted      |         | Adjusted        |         |
|--------------------------------|-----------------|---------|-----------------|---------|
|                                | OR (95%CI)      | P value | OR (95%CI)      | P value |
| New onset of heart failure     | 1.86(1.51-2.28) | <0.0001 | 1.69(1.37-2.09) | <0.0001 |
| Cardiac arrest at presentation | 3.81(2.5-5.82)  | <0.0001 | 3.38(2.19-5.21) | <0.0001 |
| Aspirin within 24-hour         | 1.7(1.51-1.93)  | <0.0001 | 1.43(1.22-1.67) | <0.0001 |
| Statins within 24-hour         | 1.64(1.45-1.85) | <0.0001 | 1.33(1.13-1.57) | 0.0005  |
| <b>Reperfusion therapies</b>   |                 |         |                 |         |
| None                           | -               |         | -               |         |
| Fibrinolytic therapy           | 1.57(1.33-1.85) | <0.0001 | 1.6(1.35-1.9)   | <0.0001 |
| Primary PCI                    | 1.65(1.42-1.92) | <0.0001 | 1.69(1.44-1.98) | <0.0001 |





**G. Comparisons between patients with and without IV magnesium sulfate therapy after propensity score matching**

| Characteristics                   | Use N(%)   | Non-Use(%) | P value |
|-----------------------------------|------------|------------|---------|
| <b>Patient characteristics</b>    |            |            |         |
| Age                               |            |            |         |
| 55-64                             | 1072(24.4) | 1037(23.6) | .794    |
| 65-74                             | 1290(29.4) | 1283(29.2) |         |
| <55                               | 938(21.3)  | 959(21.8)  |         |
| ≥75                               | 1094(24.9) | 1115(25.4) |         |
| Gender                            |            |            |         |
| Female                            | 1346(30.6) | 1299(29.6) | .274    |
| Male                              | 3048(69.4) | 3095(70.4) |         |
| Hypertension                      | 2247(51.1) | 2196(50)   | .277    |
| Diabetes                          | 889(20.2)  | 878(20)    | .77     |
| Dyslipidemia                      | 235(5.3)   | 244(5.6)   | .672    |
| Currently smoking                 | 1496(34)   | 1470(33.5) | .558    |
| Number of risk factors            |            |            |         |
| 1                                 | 2055(46.8) | 1997(45.4) | .445    |
| 2                                 | 1049(23.9) | 1047(23.8) |         |
| ≥3                                | 232(5.3)   | 229(5.2)   |         |
| None                              | 1058(24.1) | 1121(25.5) |         |
| Prior ischemic stroke             | 546(12.4)  | 484(11)    | .040    |
| Prior myocardial infarction       | 416(9.5)   | 382(8.7)   | .207    |
| Prior CABG/PCI                    | 104(2.4)   | 107(2.4)   | .834    |
| Chest discomfort                  | 4021(91.5) | 4046(92.1) | .331    |
| Left branch block at presentation | 65(1.5)    | 44(1.0)    | .043    |
| Cardiac arrest at presentation    | 81(1.8)    | 79(1.8)    | .873    |
| Cardiogenic shock at presentation | 279(6.3)   | 236(5.4)   | .051    |
| Acute stroke at presentation      | 77(1.8)    | 66(1.5)    | .354    |
| Heart rate at presentation, bpm   |            |            | .733    |
| <50                               | 177(4.0)   | 183(4.2)   |         |
| 50-110                            | 3886(88.4) | 3898(88.7) |         |
| >110                              | 331(7.5)   | 313(7.1)   |         |
| SBP at presentation, mmHg         |            |            | .621    |
| <120                              | 1565(35.6) | 1607(36.6) |         |
| 120-139                           | 1299(29.6) | 1307(29.7) |         |
| 140-159                           | 913(20.8)  | 899(20.5)  |         |
| ≥160                              | 617(14)    | 581(13.2)  |         |
| <b>Medication within 24 hours</b> |            |            |         |
| Aspirin                           | 2688(61.2) | 2686(61.1) | .965    |

|    |                                        |            |            |      |
|----|----------------------------------------|------------|------------|------|
| 1  |                                        |            |            |      |
| 2  |                                        |            |            |      |
| 3  |                                        |            |            |      |
| 4  | Statins                                | 2398(54.6) | 2442(55.6) | .345 |
| 5  | ACE inhibitors or angiotensin receptor | 2541(57.8) | 2567(58.4) | .574 |
| 6  | Beta-blockers                          | 1768(40.2) | 1748(39.8) |      |
| 7  |                                        |            |            |      |
| 8  | Clopidogrel                            | 1845(42)   | 1894(43.1) | .290 |
| 9  |                                        |            |            | .941 |
| 10 | Reperfusion therapies                  |            |            |      |
| 11 | No reperfusion                         | 3130(71.2) | 3131(71.3) |      |
| 12 | Fibrinolytic therapy                   | 746(17.0)  | 754(17.2)  |      |
| 13 | Primary PCI                            | 518(11.8)  | 509(11.6)  |      |
| 14 |                                        |            |            |      |
| 15 | <b>Hospital characteristics</b>        |            |            |      |
| 16 | Teaching hospital                      | 3462(78.8) | 3530(80.3) | .072 |
| 17 | PCI-capable hospital                   | 2768(63.0) | 2788(63.5) | .650 |
| 18 |                                        |            |            | .451 |
| 19 | Hospital level                         |            |            |      |
| 20 | Secondary or lower                     | 1576(35.9) | 1610(36.6) |      |
| 21 | Tertiary                               | 2818(64.1) | 2784(63.4) |      |
| 22 |                                        |            |            |      |
| 23 | Economic geographic region             |            |            |      |
| 24 | Central                                | 1115(25.4) | 1186(27.0) | .191 |
| 25 | Eastern                                | 2360(53.7) | 2288(52.1) |      |
| 26 | Western                                | 919(20.9)  | 920(20.9)  |      |
| 27 |                                        |            |            |      |
| 28 | Urban/Rural                            |            |            |      |
| 29 | Rural                                  | 1724(39.2) | 1721(39.2) | .948 |
| 30 | Urban                                  | 2670(60.8) | 2673(60.8) |      |
| 31 |                                        |            |            |      |
| 32 |                                        |            |            |      |
| 33 |                                        |            |            |      |
| 34 |                                        |            |            |      |
| 35 |                                        |            |            |      |
| 36 |                                        |            |            |      |
| 37 |                                        |            |            |      |
| 38 |                                        |            |            |      |
| 39 |                                        |            |            |      |
| 40 |                                        |            |            |      |
| 41 |                                        |            |            |      |
| 42 |                                        |            |            |      |
| 43 |                                        |            |            |      |
| 44 |                                        |            |            |      |
| 45 |                                        |            |            |      |
| 46 |                                        |            |            |      |
| 47 |                                        |            |            |      |
| 48 |                                        |            |            |      |
| 49 |                                        |            |            |      |
| 50 |                                        |            |            |      |
| 51 |                                        |            |            |      |
| 52 |                                        |            |            |      |
| 53 |                                        |            |            |      |
| 54 |                                        |            |            |      |
| 55 |                                        |            |            |      |
| 56 |                                        |            |            |      |
| 57 |                                        |            |            |      |
| 58 |                                        |            |            |      |
| 59 |                                        |            |            |      |
| 60 |                                        |            |            |      |

**H. Trends different dosage of intravenous magnesium sulfate therapy in 2001, 2006, 2011 and 2015 in five economic-geographic regions.**

**Single dosage of intravenous magnesium sulfate therapy**

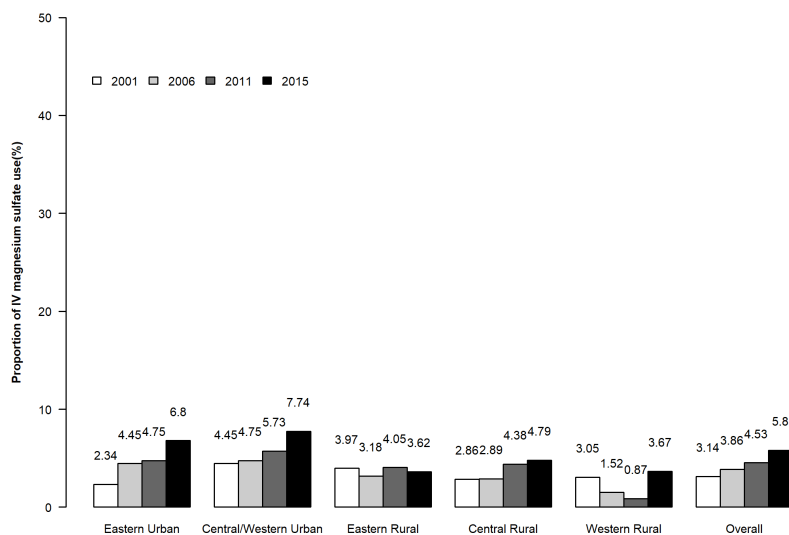

**Multiple dosage of intravenous magnesium sulfate therapy**

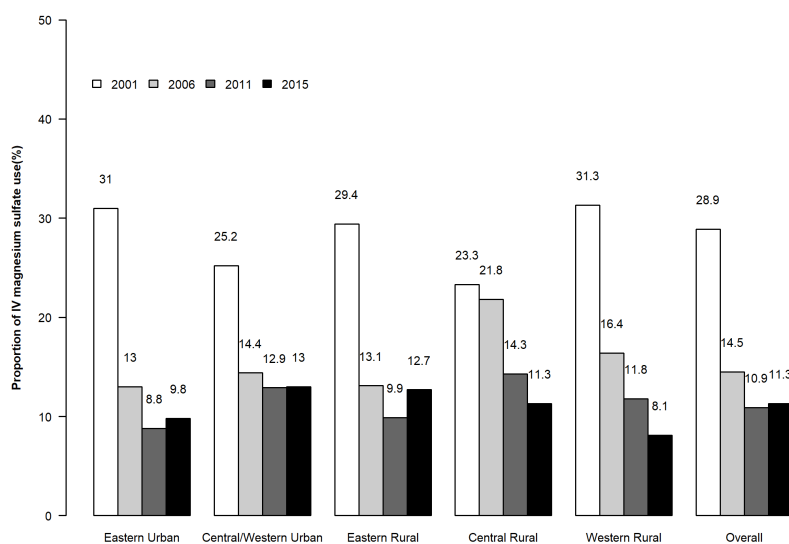

I. Different dosage of IV magnesium sulfate use in 2001, 2006, 2011 and 2015 among all hospitals.

Single dose of IV magnesium sulfate

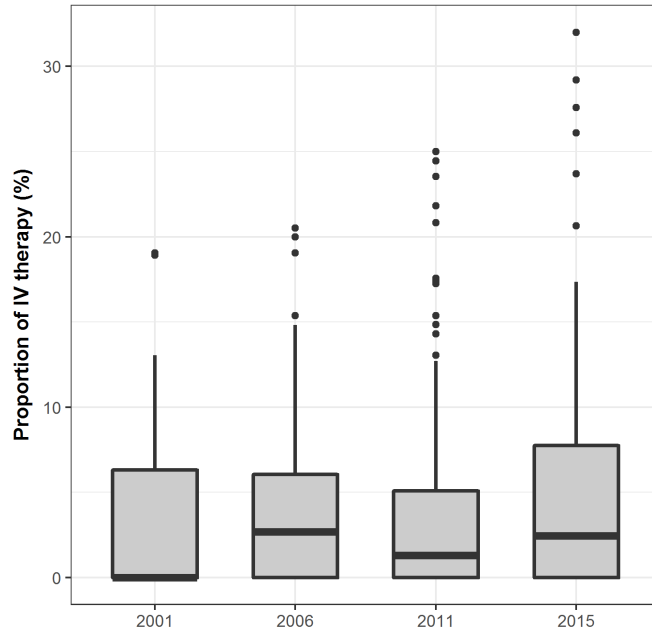

Multiple doses of IV magnesium sulfate

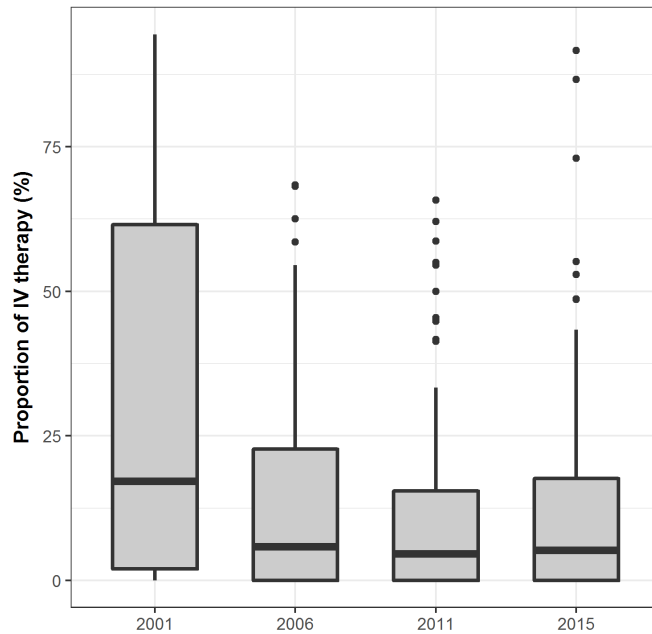

**J. In-hospital outcomes between patients with different dosage of and without IV magnesium sulphate.**

**Single dose compared with no-use of IV magnesium sulphate**

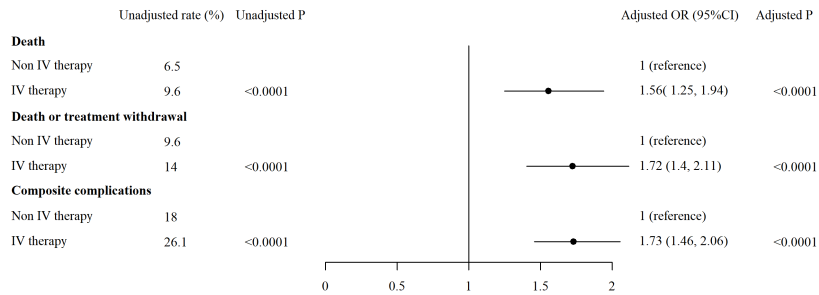

**Multiple doses compared with no-use of IV magnesium sulphate**

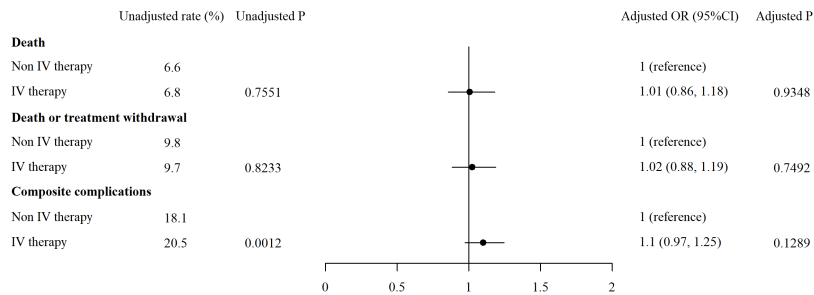

1  
2  
3  
4  
5  
6  
7  
8  
9  
10  
11  
12  
13  
14  
15  
16  
17  
18  
19  
20  
21  
22  
23  
24  
25  
26  
27  
28  
29  
30  
31  
32  
33  
34  
35  
36  
37  
38  
39  
40  
41  
42  
43  
44  
45  
46  
47  
48  
49  
50  
51  
52  
53  
54  
55  
56  
57  
58  
59  
60STROBE Statement—Checklist of items that should be included in reports of *case-control studies*

|                              | Item No | Recommendation                                                                                                                                                                                    | Page No |
|------------------------------|---------|---------------------------------------------------------------------------------------------------------------------------------------------------------------------------------------------------|---------|
| <b>Title and abstract</b>    | 1       | (a) Indicate the study's design with a commonly used term in the title or the abstract                                                                                                            | 3       |
|                              |         | (b) Provide in the abstract an informative and balanced summary of what was done and what was found                                                                                               | 3       |
| <b>Introduction</b>          |         |                                                                                                                                                                                                   |         |
| Background/rationale         | 2       | Explain the scientific background and rationale for the investigation being reported                                                                                                              | 5       |
| Objectives                   | 3       | State specific objectives, including any prespecified hypotheses                                                                                                                                  | 5       |
| <b>Methods</b>               |         |                                                                                                                                                                                                   |         |
| Study design                 | 4       | Present key elements of study design early in the paper                                                                                                                                           | 6       |
| Setting                      | 5       | Describe the setting, locations, and relevant dates, including periods of recruitment, exposure, follow-up, and data collection                                                                   | 6, 7    |
| Participants                 | 6       | (a) Give the eligibility criteria, and the sources and methods of case ascertainment and control selection. Give the rationale for the choice of cases and controls                               | 7       |
|                              |         | (b) For matched studies, give matching criteria and the number of controls per case                                                                                                               |         |
| Variables                    | 7       | Clearly define all outcomes, exposures, predictors, potential confounders, and effect modifiers. Give diagnostic criteria, if applicable                                                          | 7       |
| Data sources/<br>measurement | 8*      | For each variable of interest, give sources of data and details of methods of assessment (measurement). Describe comparability of assessment methods if there is more than one group              | 7       |
| Bias                         | 9       | Describe any efforts to address potential sources of bias                                                                                                                                         | 9       |
| Study size                   | 10      | Explain how the study size was arrived at                                                                                                                                                         | 6       |
| Quantitative variables       | 11      | Explain how quantitative variables were handled in the analyses. If applicable, describe which groupings were chosen and why                                                                      | 8, 9    |
| Statistical methods          | 12      | (a) Describe all statistical methods, including those used to control for confounding                                                                                                             | 8       |
|                              |         | (b) Describe any methods used to examine subgroups and interactions                                                                                                                               | 8       |
|                              |         | (c) Explain how missing data were addressed                                                                                                                                                       |         |
|                              |         | (d) If applicable, explain how matching of cases and controls was addressed                                                                                                                       | 9       |
|                              |         | (e) Describe any sensitivity analyses                                                                                                                                                             |         |
| <b>Results</b>               |         |                                                                                                                                                                                                   |         |
| Participants                 | 13*     | (a) Report numbers of individuals at each stage of study—eg numbers potentially eligible, examined for eligibility, confirmed eligible, included in the study, completing follow-up, and analysed | 10      |
|                              |         | (b) Give reasons for non-participation at each stage                                                                                                                                              | 23      |
|                              |         | (c) Consider use of a flow diagram                                                                                                                                                                | 23      |
| Descriptive data             | 14*     | (a) Give characteristics of study participants (eg demographic, clinical, social) and information on exposures and potential confounders                                                          | 21, 22  |
|                              |         | (b) Indicate number of participants with missing data for each variable of interest                                                                                                               |         |
| Outcome data                 | 15*     | Report numbers in each exposure category, or summary measures of exposure                                                                                                                         | 11, 25  |

|    |                          |    |                                                                                                                                                                                                              |
|----|--------------------------|----|--------------------------------------------------------------------------------------------------------------------------------------------------------------------------------------------------------------|
| 1  |                          |    |                                                                                                                                                                                                              |
| 2  |                          |    |                                                                                                                                                                                                              |
| 3  | Main results             | 16 | (a) Give unadjusted estimates and, if applicable, confounder-adjusted estimates and their precision (eg, 95% confidence interval). Make clear which confounders were adjusted for and why they were included |
| 4  |                          |    | 25                                                                                                                                                                                                           |
| 5  |                          |    | 26                                                                                                                                                                                                           |
| 6  |                          |    |                                                                                                                                                                                                              |
| 7  |                          |    | (b) Report category boundaries when continuous variables were categorized                                                                                                                                    |
| 8  |                          |    | 21,                                                                                                                                                                                                          |
| 9  |                          |    | 22                                                                                                                                                                                                           |
| 10 |                          |    |                                                                                                                                                                                                              |
| 11 |                          |    | (c) If relevant, consider translating estimates of relative risk into absolute risk for a meaningful time period                                                                                             |
| 12 | Other analyses           | 17 | Report other analyses done—eg analyses of subgroups and interactions, and sensitivity analyses                                                                                                               |
| 13 |                          |    |                                                                                                                                                                                                              |
| 14 |                          |    |                                                                                                                                                                                                              |
| 15 |                          |    |                                                                                                                                                                                                              |
| 16 | <b>Discussion</b>        |    |                                                                                                                                                                                                              |
| 17 | Key results              | 18 | Summarise key results with reference to study objectives                                                                                                                                                     |
| 18 |                          |    | 12,13                                                                                                                                                                                                        |
| 19 | Limitations              | 19 | Discuss limitations of the study, taking into account sources of potential bias or imprecision. Discuss both direction and magnitude of any potential bias                                                   |
| 20 |                          |    | 14,15                                                                                                                                                                                                        |
| 21 | Interpretation           | 20 | Give a cautious overall interpretation of results considering objectives, limitations, multiplicity of analyses, results from similar studies, and other relevant evidence                                   |
| 22 |                          |    | 12,15                                                                                                                                                                                                        |
| 23 | Generalisability         | 21 | Discuss the generalisability (external validity) of the study results                                                                                                                                        |
| 24 |                          |    | 15                                                                                                                                                                                                           |
| 25 | <b>Other information</b> |    |                                                                                                                                                                                                              |
| 26 | Funding                  | 22 | Give the source of funding and the role of the funders for the present study and, if applicable, for the original study on which the present article is based                                                |
| 27 |                          |    | 16                                                                                                                                                                                                           |
| 28 |                          |    |                                                                                                                                                                                                              |

29  
30 \*Give information separately for cases and controls.

31  
32  
33 **Note:** An Explanation and Elaboration article discusses each checklist item and gives methodological background and published examples of transparent reporting. The STROBE checklist is best used in conjunction with this article (freely available on the Web sites of PLoS Medicine at <http://www.plosmedicine.org/>, Annals of Internal Medicine at <http://www.annals.org/>, and Epidemiology at <http://www.epidem.com/>). Information on the STROBE Initiative is available at <http://www.strobe-statement.org>.

34  
35  
36  
37  
38  
39  
40  
41  
42  
43  
44  
45  
46  
47  
48  
49  
50  
51  
52  
53  
54  
55  
56  
57  
58  
59  
60
